# Supplementary material
Source: PubMed Central journal article supplement (PMC8145154)
Supplement: jamapediatr-e210775-s001.pdf [file jamapediatr-e210775-s001.pdf]

## Supplementary Online Content

Abiramalatha T, Ramaswamy VV, Bandyopadhyay T, et al. Delivery room interventions for hypothermia in preterm neonates: a systematic review and network meta-analysis. *JAMA Pediatr*. Published online May 24, 2021. doi:10.1001/jamapediatrics.2021.0775

**eFigure 1.** PRISMA flow

**eFigure 2.** Mean gestational age of the enrolled neonates

**eFigure 3.** Mean birth weight of the enrolled neonates

**eFigure 4.** Risk of bias summary and graph of the included trials

**eFigure 5.** Direct evidence from the pair wise comparisons for the primary outcome: mean core body temperature (axillary or rectal) at admission or within first 2 hours of life

**eFigure 6.** Split between direct and indirect evidence for the primary outcome: mean core body temperature (axillary or rectal) at admission or within first 2 hours of life

**eFigure 7.** Sensitivity analysis by evaluating plastic bag and plastic wrap as separate interventions for the primary outcome: Mean core body temperature (axillary or rectal) at admission or within first 2 hours of life. **A.** Network plot; **B.** SUCRA plot; **C.** Forest plot depicting the network estimates [MD (95% CrI)] of the various interventions with “Routine Care” as the common comparator

**eFigure 8.** League plot depicting the network estimate [MD (95% CrI)] for sensitivity analysis by evaluating plastic bag and plastic wrap as separate interventions for the primary outcome: mean core body temperature (axillary or rectal) at admission or within first 2 hours of life

**eFigure 9.** Split between direct and indirect evidence for sensitivity analysis by evaluating plastic bag and plastic wrap as separate interventions for the primary outcome: mean core body temperature (axillary or rectal) at admission or within first 2 hours of life

**eFigure 10.** Sensitivity analysis by evaluating studies in which the mean gestational age of the included neonates was  $\leq 30$  weeks for the primary outcome: Mean core body temperature (axillary or rectal) at admission or within first 2 hours of life. **A.** Network plot; **B.** SUCRA plot; **C.** Forest plot depicting the network estimates [MD (95% CrI)] of the various interventions with “Routine Care” as the common comparator

**eFigure 11.** League plot depicting the network estimate for sensitivity analysis by evaluating studies in which the mean gestational age of the included neonates was  $\leq 30$  weeks for the primary outcome: mean core body temperature (axillary or rectal) at admission or within first 2 hours of life

**eFigure 12.** Split between direct and indirect evidence for sensitivity analysis by evaluating studies in which the mean gestational age of the included neonates was  $\leq 30$  weeks for the primary outcome: mean core body temperature (axillary or rectal) at admission or within first 2 hours of life

**eFigure 13.** Meta-regression with gestational age as covariate

**eFigure 14.** Sensitivity analysis by evaluating drying versus no drying before wrapping in a plastic bag / wrap for the primary outcome: Mean core body temperature (axillary or rectal) at

admission or within first 2 hours of life. **A.** Network plot; **B.** SUCRA plot; **C.** Forest plot depicting the network estimates [MD (95% CrI)] of the various interventions with “Routine Care” as the common comparator

**eFigure 15.** League plot depicting the network estimate for sensitivity analysis - drying versus no drying before wrapping in a plastic bag / wrap for the primary outcome: mean core body temperature (axillary or rectal) at admission or within first 2 hours of life

**eFigure 16.** League plot depicting the network estimate [RR (95% CrI)] for primary outcome moderate or severe hypothermia [defined as core body temperature (axillary or rectal) less than 36 degree Celsius] at admission or within 2 hours of life

**eFigure 17.** Direct evidence from the pair wise comparisons for the primary outcome moderate or severe hypothermia [defined as core body temperature (axillary or rectal) less than 36 degree Celsius] at admission or within 2 hours of life

**eFigure 18.** Split between direct and indirect evidence for the primary outcome moderate or severe hypothermia [defined as core body temperature (axillary or rectal) less than 36 degree Celsius] at admission or within 2 hours of life

**eFigure 19.** Sensitivity analysis by evaluating any hypothermia (defined as core body temperature less than 36.5 degree Celsius at admission or within 1-2 hours of life). **A.** Network plot; **B.** SUCRA plot; **C.** Forest plot depicting the network estimates [MD (95% CrI)] of the various interventions with “Routine Care” as the common comparator.

**eFigure 20.** League plot depicting the network estimate [RR (95% CrI)] for sensitivity analysis - any hypothermia (defined as core body temperature less than 36.5 degree Celsius at admission or within 1-2 hours of life)

**eFigure 21.** Split between direct and indirect evidence for sensitivity analysis - any hypothermia (defined as core body temperature less than 36.5 degree Celsius at admission or within 1-2 hours of life)

**eFigure 22.** Direct evidence from the pair wise comparisons for sensitivity analysis - any hypothermia (defined as core body temperature less than 36.5 degree Celsius at admission or within 1-2 hours of life)

**eFigure 23.** Mortality before discharge. **A.** Network plot; **B.** SUCRA plot; **C.** Forest plot depicting the network estimates [MD (95% CrI)] of the various interventions with “Routine Care” as the common comparator

**eFigure 24.** League plot depicting the network estimate [RR (95% CrI)] for mortality before discharge

**eFigure 25.** Split between direct and indirect evidence for mortality before discharge

**eFigure 26.** Direct evidence from the pair wise comparisons for mortality before discharge

**eFigure 27.** Hyperthermia [defined as core body temperature (axillary or rectal) more than 37.5 degree Celsius] at admission or within 2 hours of life. **A.** Network plot; **B.** SUCRA plot; **C.** Forest plot depicting the network estimates [MD (95% CrI)] of the various interventions with “Routine Care” as the common comparator

**eFigure 28.** League plot depicting the network estimate [RR (95% CrI)] for hyperthermia [defined as core body temperature (axillary or rectal) more than 37.5 degree Celsius] at admission or within 2 hours of life

**eFigure 29.** Split between direct and indirect evidence for hyperthermia [defined as core body temperature (axillary or rectal) more than 37.5 degree Celsius] at admission or within 2 hours of life

**eFigure 30.** Direct evidence from the pair wise comparisons for hyperthermia [defined as core body temperature (axillary or rectal) more than 37.5 degree Celsius] at admission or within 2 hours of life

**eFigure 31.** Major brain injury (MBI) defined as grade III-IV intraventricular hemorrhage or periventricular leukomalacia. **A.** Network plot; **B.** SUCRA plot; **C.** Forest plot depicting the network estimates [MD (95% CrI)] of the various interventions with “Routine Care” as the common comparator.

**eFigure 32.** League plot depicting the network estimate [RR (95% CrI)] for MBI defined as grade III-IV intraventricular hemorrhage or periventricular leukomalacia

**eFigure 33.** Direct Evidence from the pair wise comparisons for MBI defined as grade III-IV intraventricular hemorrhage or periventricular leukomalacia

**eFigure 34.** Funnel plots and Trim plots for pairwise comparisons - 'PBWr' versus 'Routine Care' for outcomes - Mean core body temperature, Mortality before discharge, Hyperthermia

**eTable 1.** Literature search strategy for two electronic databases

**eTable 2.** Some of the studies that were excluded for valid reasons

**eTable 3.** Network characteristics for all the outcomes and sensitivity analysis

**eTable 4.** Certainty of evidence for different comparisons for the sensitivity analyses and secondary outcomes

**eTable 5.** Summary of results of the network meta-analysis

**eReferences**

**eFigure 1. PRISMA Flow**

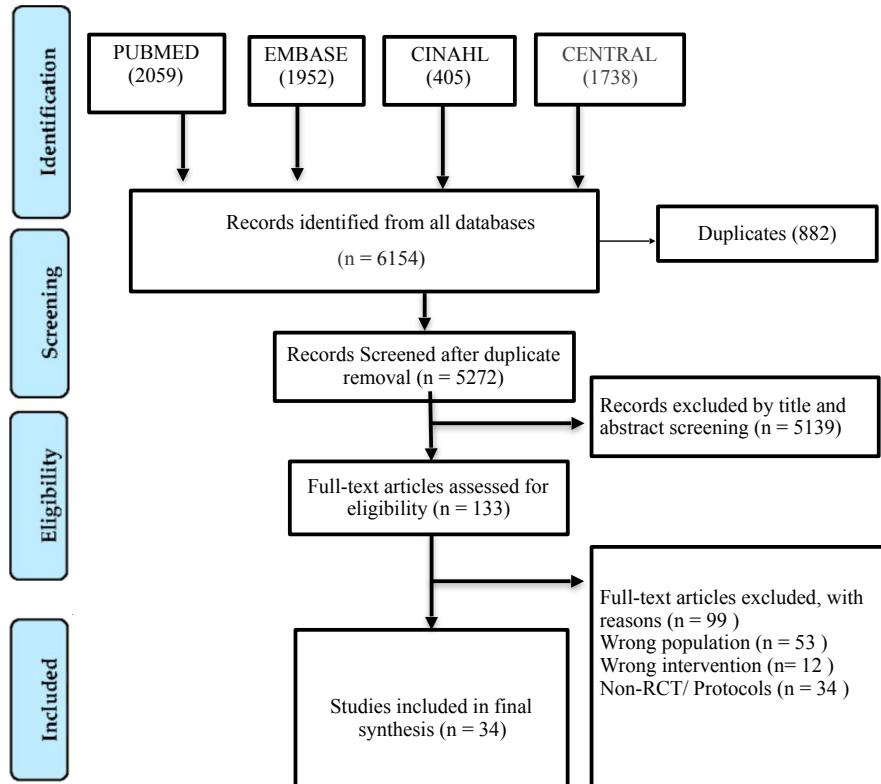

**eFigure 2.** Mean gestational age of the enrolled neonates

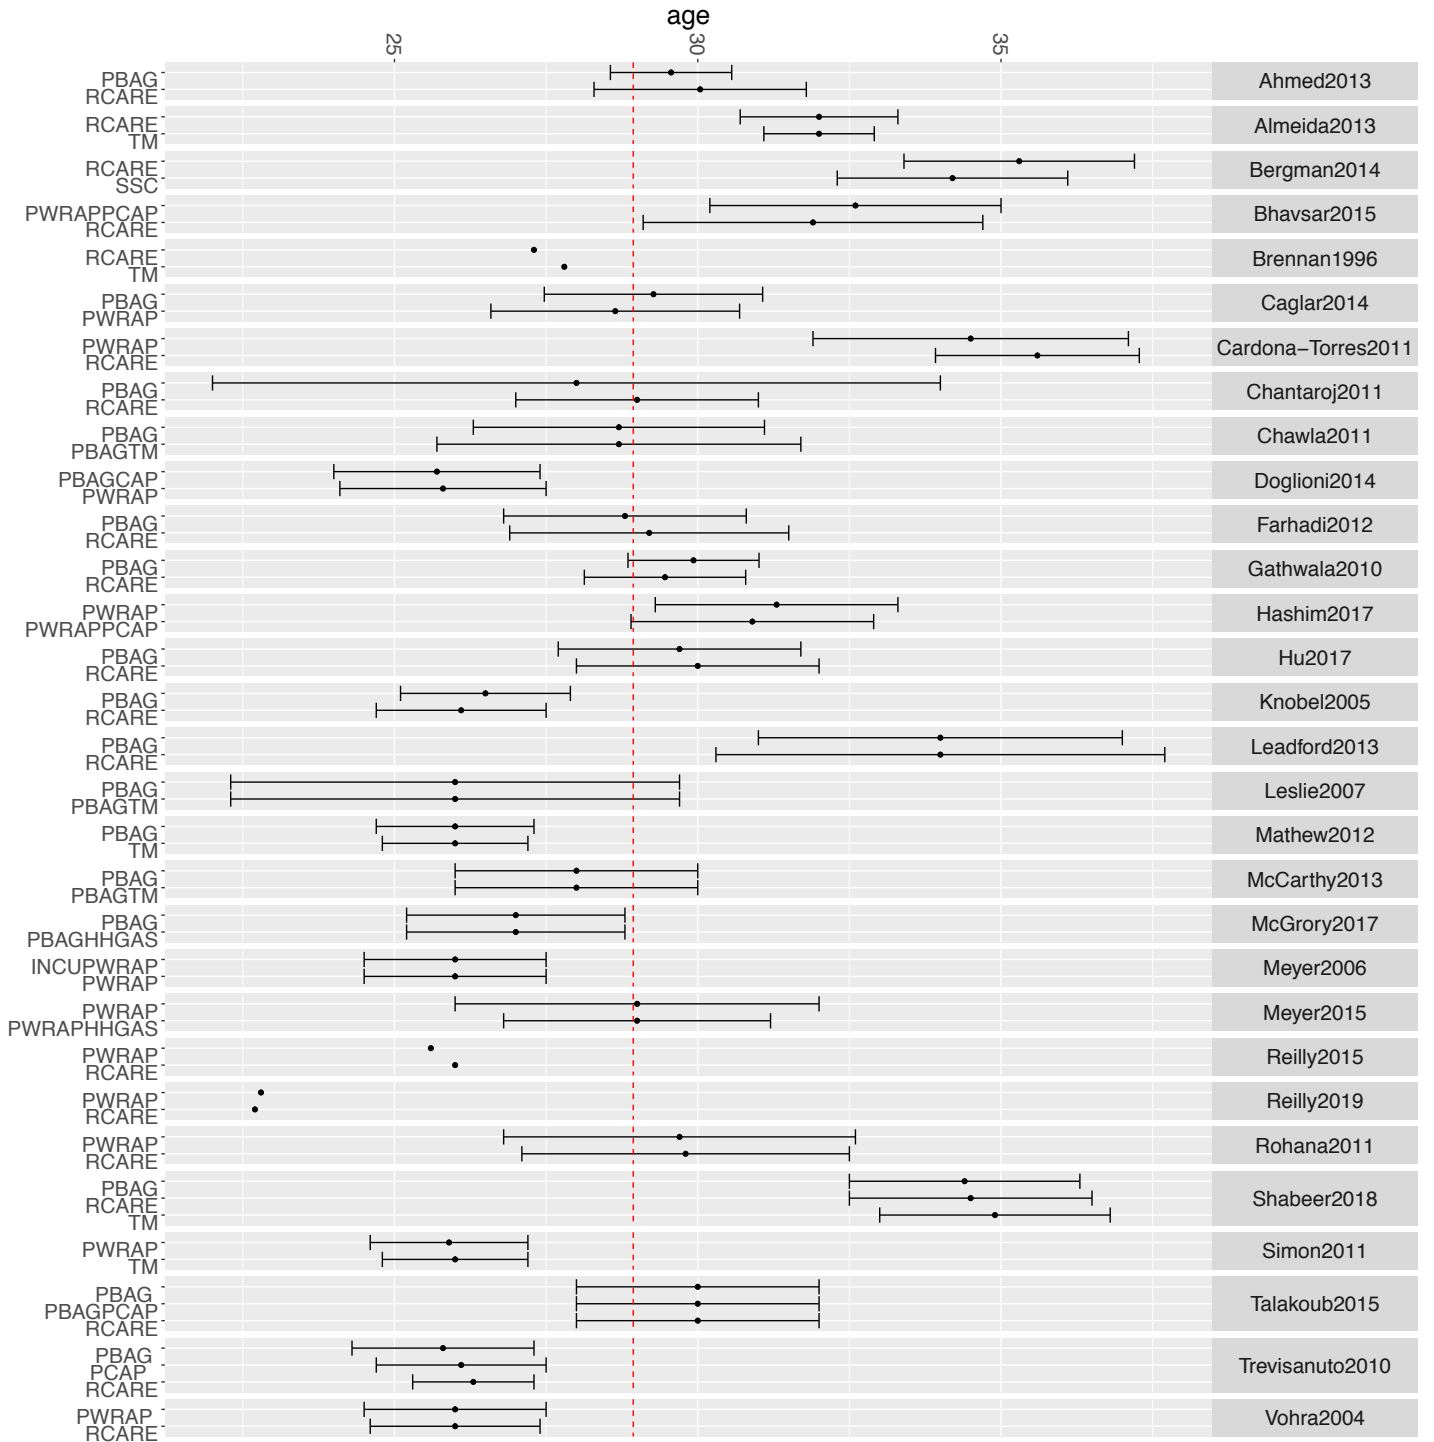

Error bars: age +/- age SD

**eFigure 3.** Mean birth weight of the enrolled neonates

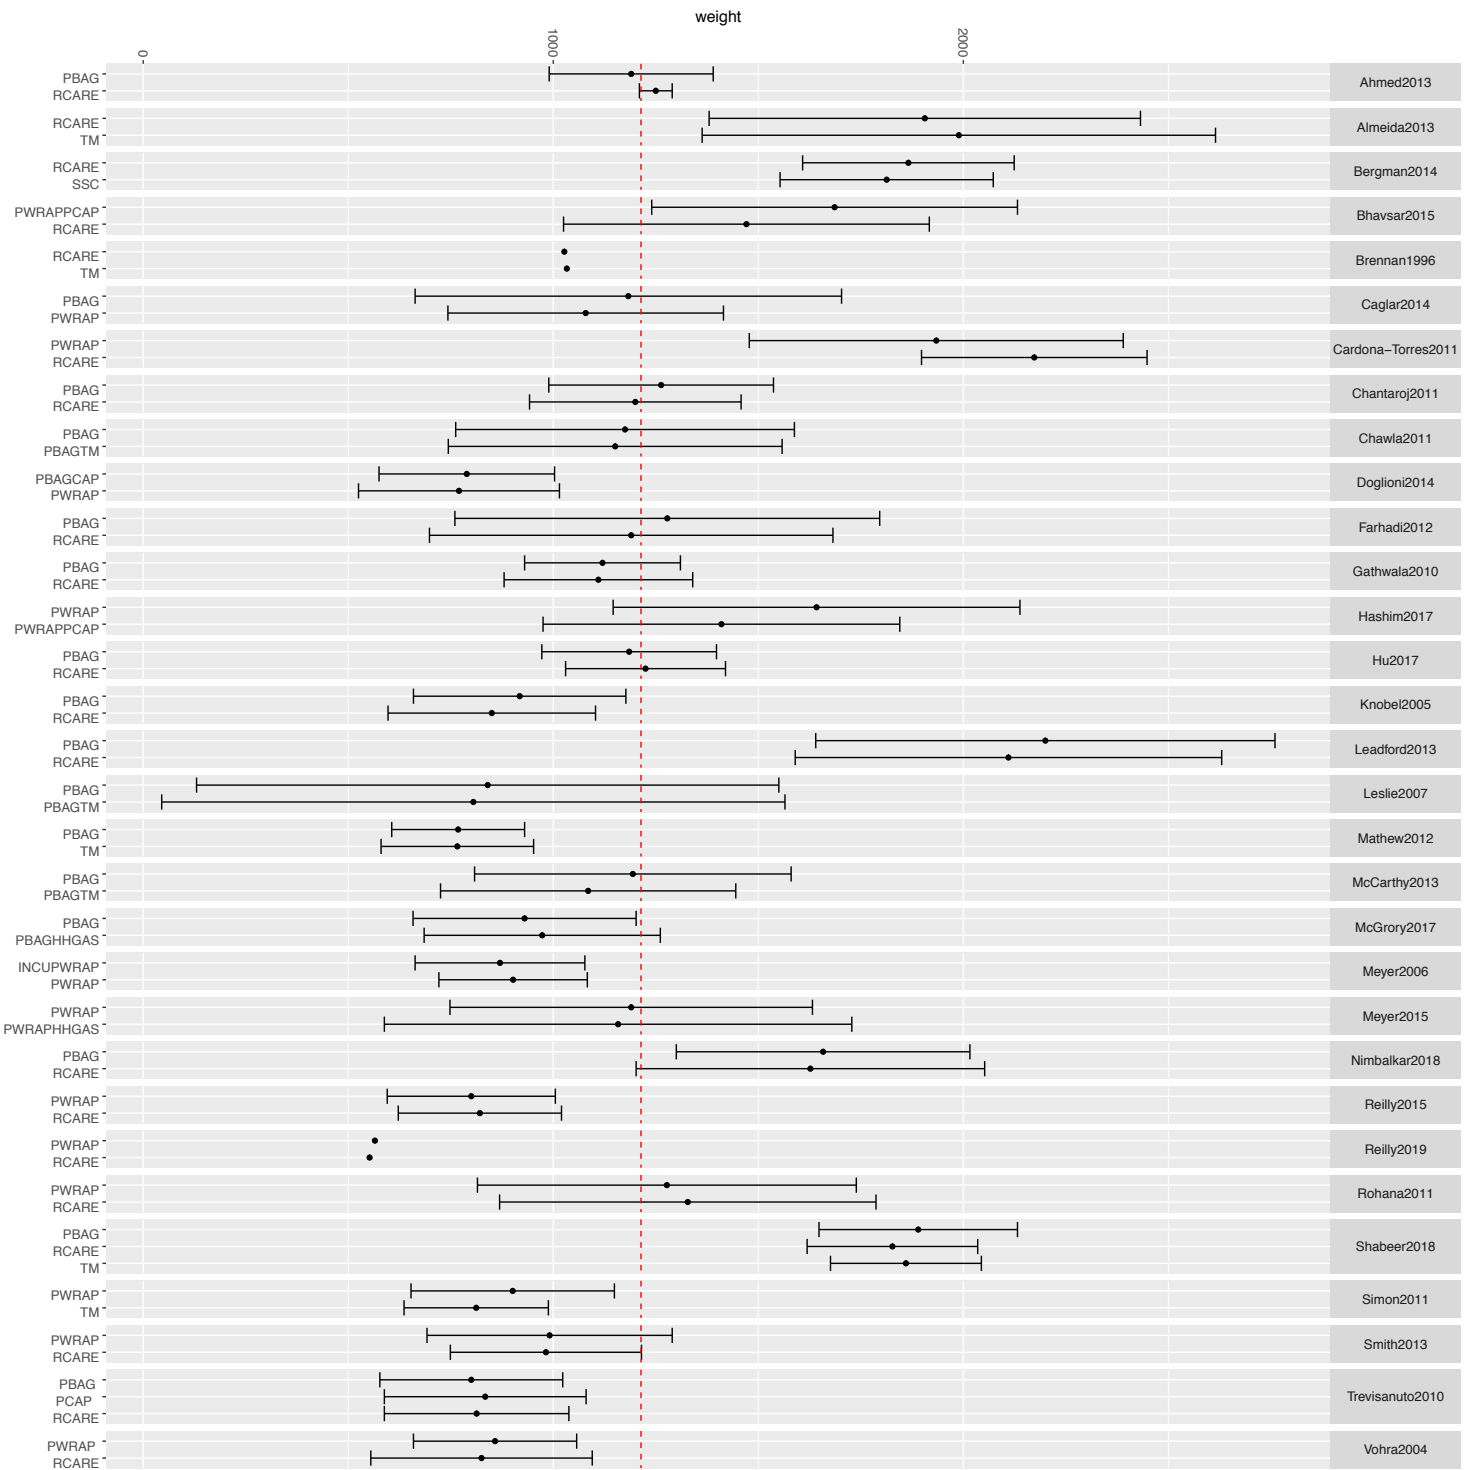

**eFigure 4.** Risk of bias summary and graph of the included trials 1-34

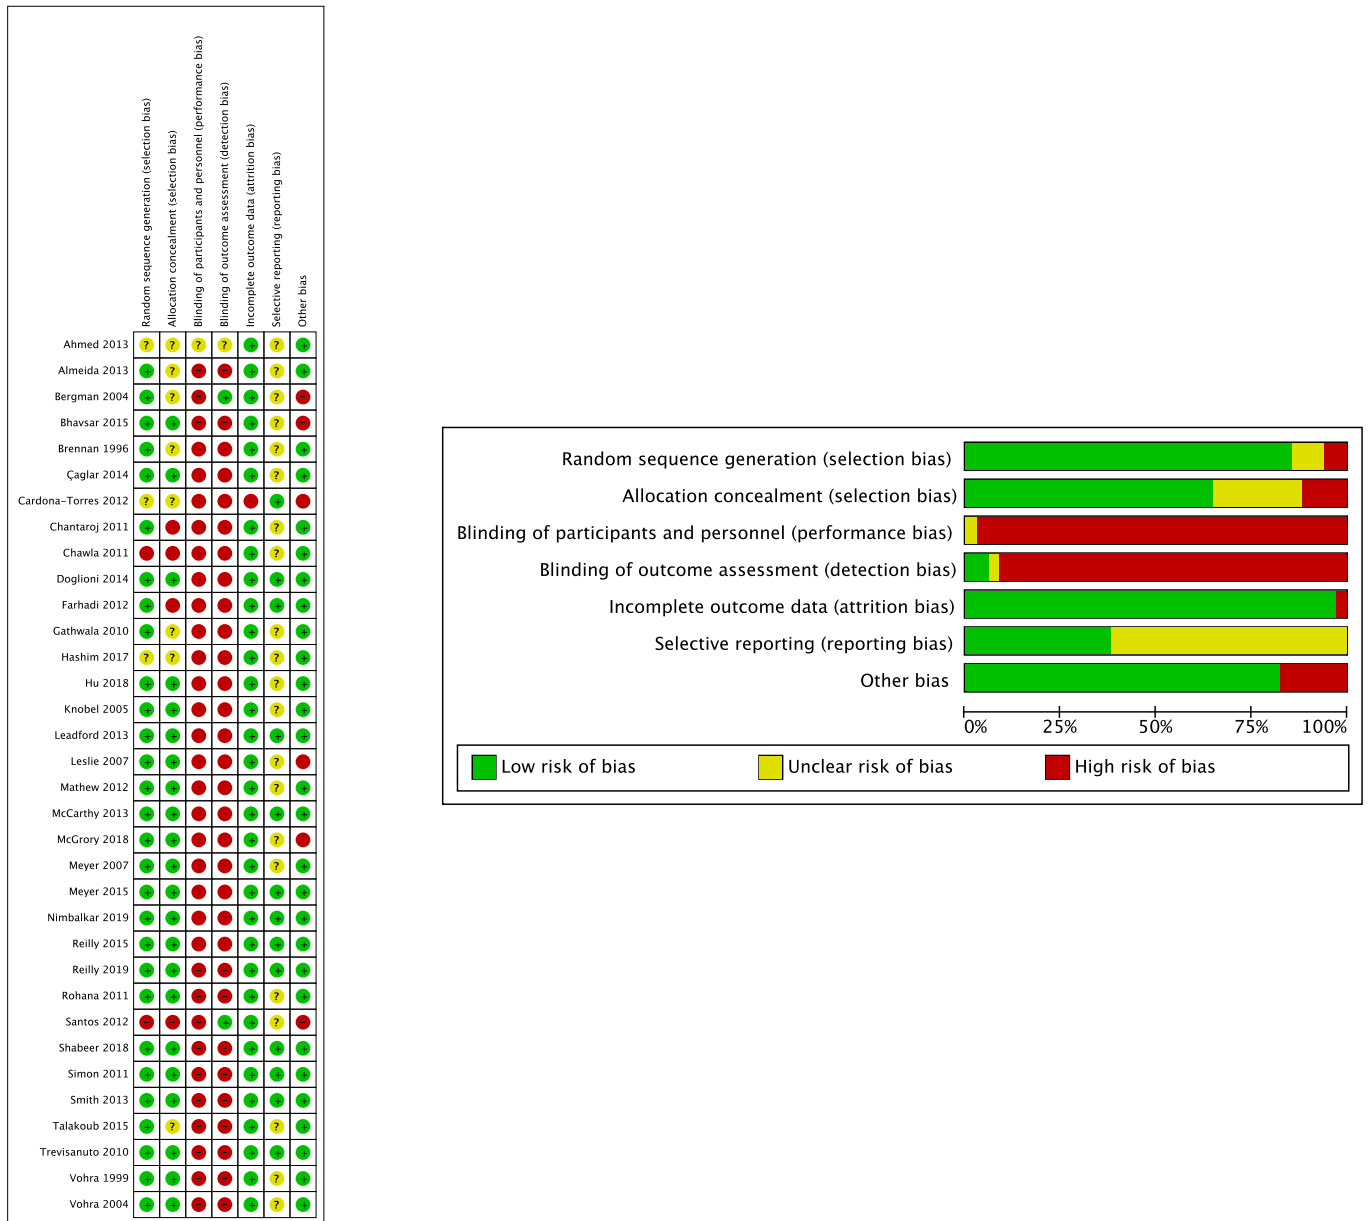

**eFigure 5.** Direct evidence from the pair wise comparisons for the primary outcome: Mean core body temperature (axillary or rectal) at admission or within first 2 hours of life

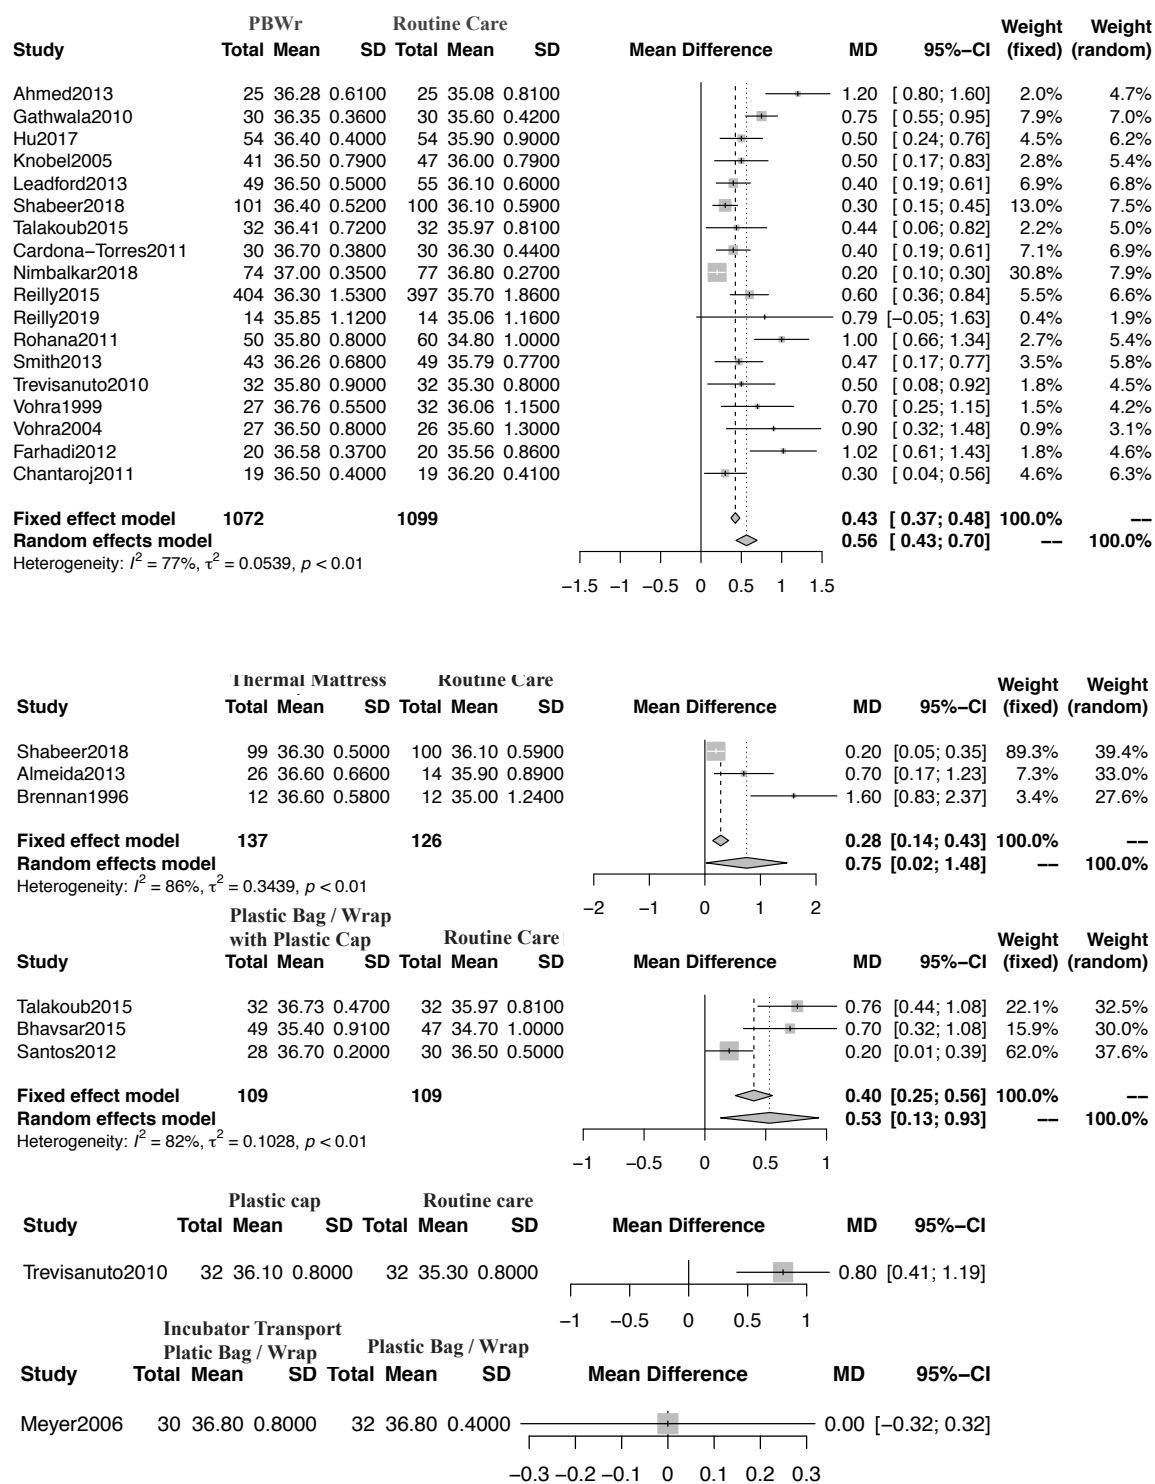



| Study           | Plastic Bag / Wrap |       | Plastic Cap |    | Mean Difference | MD     | 95%-CI              |
|-----------------|--------------------|-------|-------------|----|-----------------|--------|---------------------|
|                 | Total Mean         | SD    | Total Mean  | SD |                 |        |                     |
| Trevisanuto2010 | 32                 | 35.80 | 0.9000      | 32 | 36.10           | 0.8000 | -0.30 [-0.72; 0.12] |

| Study                       | Plastic Bag / Wrap with Thermal Mattress |       | Plastic Bag / Wrap |    | Mean Difference | MD     | 95%-CI                   | Weight (fixed) | Weight (random) |
|-----------------------------|------------------------------------------|-------|--------------------|----|-----------------|--------|--------------------------|----------------|-----------------|
|                             | Total Mean                               | SD    | Total Mean         | SD |                 |        |                          |                |                 |
| Chawla2011                  | 53                                       | 36.20 | 0.8000             | 49 | 35.70           | 0.8000 | 0.50 [0.19; 0.81]        | 45.6%          | 45.6%           |
| McCarthy2013                | 37                                       | 37.40 | 0.9000             | 35 | 37.00           | 0.5000 | 0.40 [0.07; 0.73]        | 39.5%          | 39.5%           |
| Leslie2007                  | 23                                       | 37.00 | 0.9000             | 24 | 36.70           | 1.0000 | 0.30 [-0.24; 0.84]       | 14.9%          | 14.9%           |
| <b>Fixed effect model</b>   | <b>113</b>                               |       | <b>108</b>         |    |                 |        | <b>0.43 [0.22; 0.64]</b> | <b>100.0%</b>  | <b>--</b>       |
| <b>Random effects model</b> |                                          |       |                    |    |                 |        | <b>0.43 [0.22; 0.64]</b> | <b>--</b>      | <b>100.0%</b>   |

Heterogeneity:  $I^2 = 0\%$ ,  $\tau^2 = 0$ ,  $p = 0.80$

| Study                       | Plastic Bag / Wrap with Plastic Cap |       | Plastic Bag / Wrap |    | Mean Difference | MD     | 95%-CI                   | Weight (fixed) | Weight (random) |
|-----------------------------|-------------------------------------|-------|--------------------|----|-----------------|--------|--------------------------|----------------|-----------------|
|                             | Total Mean                          | SD    | Total Mean         | SD |                 |        |                          |                |                 |
| Talakoub2015                | 32                                  | 36.73 | 0.4700             | 32 | 36.41           | 0.7200 | 0.32 [0.02; 0.62]        | 34.8%          | 34.8%           |
| Dogliani2014                | 50                                  | 36.50 | 0.6000             | 50 | 36.40           | 0.8000 | 0.10 [-0.18; 0.38]       | 40.1%          | 40.1%           |
| Hashim2017                  | 40                                  | 35.30 | 0.8000             | 40 | 35.10           | 0.8000 | 0.20 [-0.15; 0.55]       | 25.1%          | 25.1%           |
| <b>Fixed effect model</b>   | <b>122</b>                          |       | <b>122</b>         |    |                 |        | <b>0.20 [0.03; 0.38]</b> | <b>100.0%</b>  | <b>--</b>       |
| <b>Random effects model</b> |                                     |       |                    |    |                 |        | <b>0.20 [0.03; 0.38]</b> | <b>--</b>      | <b>100.0%</b>   |

Heterogeneity:  $I^2 = 0\%$ ,  $\tau^2 = 0$ ,  $p = 0.57$

| Study                       | Plastic Bag / Wrap with Heat Humid Gas |       | Plastic Bag / Wrap |     | Mean Difference | MD     | 95%-CI                    | Weight (fixed) | Weight (random) |
|-----------------------------|----------------------------------------|-------|--------------------|-----|-----------------|--------|---------------------------|----------------|-----------------|
|                             | Total Mean                             | SD    | Total Mean         | SD  |                 |        |                           |                |                 |
| Meyer2015                   | 100                                    | 36.70 | 0.4000             | 103 | 36.60           | 0.5000 | 0.10 [-0.02; 0.22]        | 70.0%          | 56.7%           |
| McGrory2017                 | 132                                    | 36.90 | 0.8000             | 141 | 36.60           | 0.8000 | 0.30 [0.11; 0.49]         | 30.0%          | 43.3%           |
| <b>Fixed effect model</b>   | <b>232</b>                             |       | <b>244</b>         |     |                 |        | <b>0.16 [0.06; 0.26]</b>  | <b>100.0%</b>  | <b>--</b>       |
| <b>Random effects model</b> |                                        |       |                    |     |                 |        | <b>0.19 [-0.01; 0.38]</b> | <b>--</b>      | <b>100.0%</b>   |

Heterogeneity:  $I^2 = 66\%$ ,  $\tau^2 = 0.0133$ ,  $p = 0.08$

| Study                       | Plastic Bag / Wrap |       | Thermal Mattress |    | Mean Difference | MD     | 95%-CI                     | Weight (fixed) | Weight (random) |
|-----------------------------|--------------------|-------|------------------|----|-----------------|--------|----------------------------|----------------|-----------------|
|                             | Total Mean         | SD    | Total Mean       | SD |                 |        |                            |                |                 |
| Shabeer2018                 | 101                | 36.40 | 0.5200           | 99 | 36.30           | 0.5000 | 0.10 [-0.04; 0.24]         | 87.2%          | 52.0%           |
| Simon2011                   | 19                 | 36.10 | 0.7000           | 17 | 36.50           | 0.7000 | -0.40 [-0.86; 0.06]        | 8.3%           | 28.3%           |
| Mathew2012                  | 21                 | 36.10 | 0.6000           | 20 | 35.80           | 1.3000 | 0.30 [-0.32; 0.92]         | 4.5%           | 19.7%           |
| <b>Fixed effect model</b>   | <b>141</b>         |       | <b>136</b>       |    |                 |        | <b>0.07 [-0.06; 0.20]</b>  | <b>100.0%</b>  | <b>--</b>       |
| <b>Random effects model</b> |                    |       |                  |    |                 |        | <b>-0.00 [-0.35; 0.34]</b> | <b>--</b>      | <b>100.0%</b>   |

Heterogeneity:  $I^2 = 58\%$ ,  $\tau^2 = 0.0539$ ,  $p = 0.09$

**eFigure 6.** Split between direct and indirect evidence for the primary outcome: Mean core body temperature (axillary or rectal) at admission or within first 2 hours of life

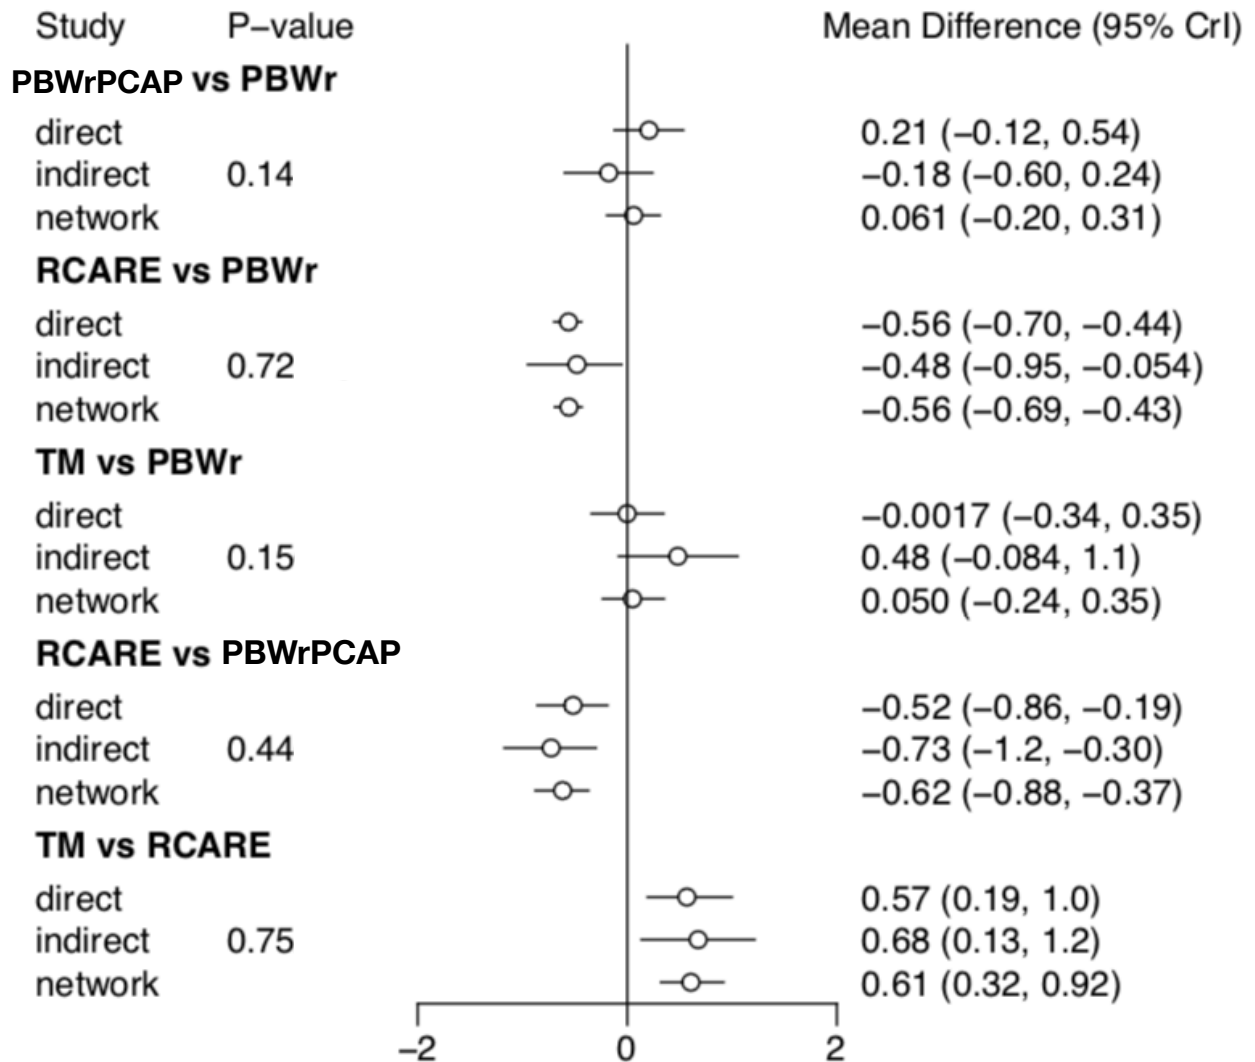

**eFigure 7.** Sensitivity analysis by evaluating plastic bag and plastic wrap as separate interventions for the primary outcome: Mean core body temperature (axillary or rectal) at admission or within first 2 hours of life. A. Network plot; B. SUCRA plot; C. Forest plot depicting the network estimates [MD (95% CrI)] of the various interventions with “Routine Care” as the common comparator

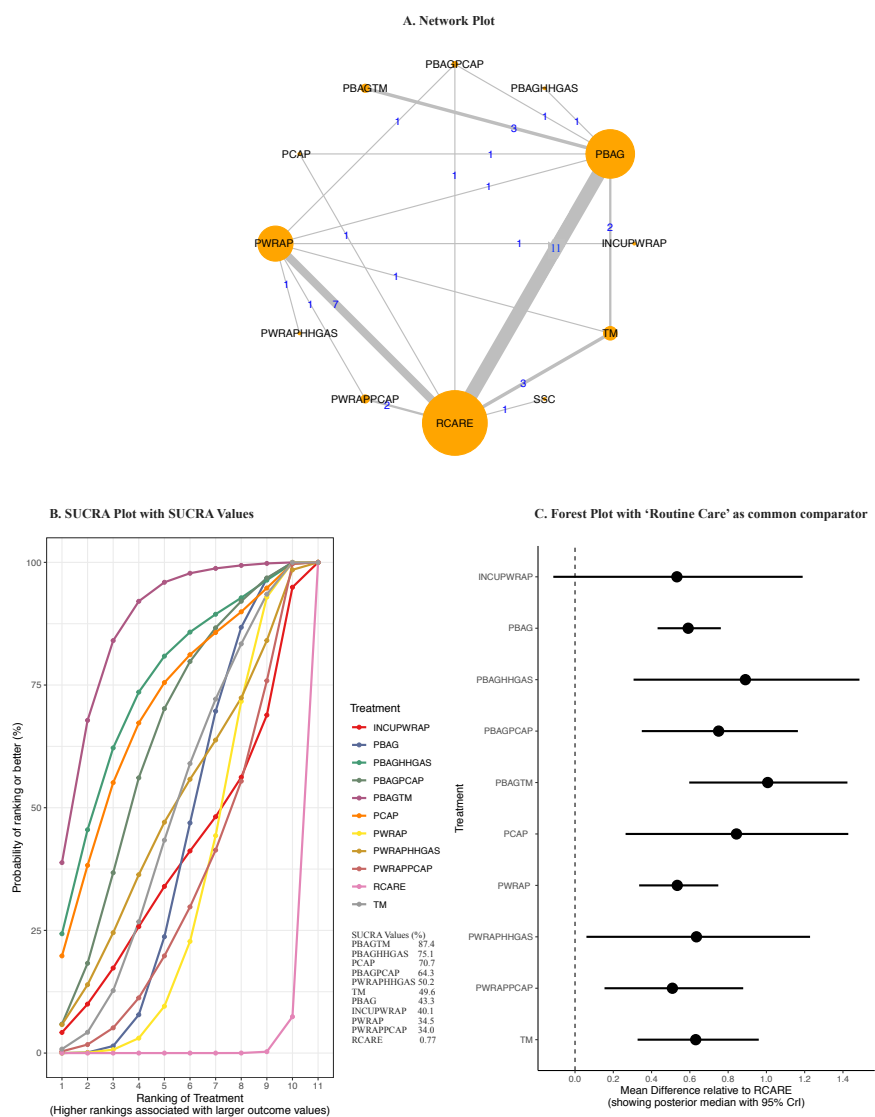

**Figure 8.** League plot depicting the network estimate [MD (95% CrI)] for sensitivity analysis by evaluating plastic bag and plastic wrap as separate interventions for the primary outcome: Mean core body temperature (axillary or rectal) at admission or within first 2 hours of life

|            | Treatment                 |                           |                           |                           |                           |                           |                              |                        |                              |                           |                              |
|------------|---------------------------|---------------------------|---------------------------|---------------------------|---------------------------|---------------------------|------------------------------|------------------------|------------------------------|---------------------------|------------------------------|
|            | PBAGTM                    | PBAGHHGAS                 | PCAP                      | PBAGPCAP                  | PWRAPHHGAS                | TM                        | PBAG                         | INCUPWRAP              | PWRAP                        | PWRAPPCAP                 | RCARE                        |
| Comparator |                           |                           |                           |                           |                           |                           |                              |                        |                              |                           |                              |
| PBAGTM     |                           | -0.12<br>(-0.80, 0.57)    | -0.16<br>(-0.86, 0.53)    | -0.26<br>(-0.82, 0.31)    | -0.37<br>(-1.07, 0.34)    | -0.37<br>(-0.86, 0.13)    | ** -0.41**<br>(-0.79, -0.03) | -0.47<br>(-1.23, 0.29) | ** -0.47**<br>(-0.92, -0.02) | -0.50<br>(-1.04, 0.05)    | ** -1.01**<br>(-1.42, -0.60) |
| PBAGHHGAS  | 0.12<br>(-0.57, 0.80)     |                           | -0.05<br>(-0.86, 0.76)    | -0.14<br>(-0.84, 0.56)    | -0.26<br>(-1.07, 0.57)    | -0.26<br>(-0.90, 0.40)    | -0.30<br>(-0.87, 0.27)       | -0.36<br>(-1.23, 0.51) | -0.36<br>(-0.97, 0.26)       | -0.38<br>(-1.07, 0.31)    | ** -0.89**<br>(-1.49, -0.31) |
| PCAP       | 0.16<br>(-0.53, 0.86)     | 0.05<br>(-0.76, 0.86)     |                           | -0.09<br>(-0.79, 0.61)    | -0.21<br>(-1.02, 0.62)    | -0.21<br>(-0.86, 0.45)    | -0.25<br>(-0.83, 0.33)       | -0.31<br>(-1.18, 0.56) | -0.31<br>(-0.92, 0.31)       | -0.33<br>(-1.01, 0.35)    | ** -0.84**<br>(-1.43, -0.26) |
| PBAGPCAP   | 0.26<br>(-0.31, 0.82)     | 0.14<br>(-0.56, 0.84)     | 0.09<br>(-0.61, 0.79)     |                           | -0.12<br>(-0.80, 0.57)    | -0.12<br>(-0.61, 0.39)    | -0.16<br>(-0.58, 0.25)       | -0.22<br>(-0.96, 0.52) | -0.22<br>(-0.62, 0.20)       | -0.24<br>(-0.77, 0.29)    | ** -0.75**<br>(-1.16, -0.35) |
| PWRAPHHGAS | 0.37<br>(-0.34, 1.07)     | 0.26<br>(-0.57, 1.07)     | 0.21<br>(-0.62, 1.02)     | 0.12<br>(-0.57, 0.80)     |                           | -0.00<br>(-0.64, 0.65)    | -0.04<br>(-0.64, 0.55)       | -0.10<br>(-0.93, 0.72) | -0.10<br>(-0.65, 0.44)       | -0.13<br>(-0.79, 0.54)    | ** -0.64**<br>(-1.23, -0.06) |
| TM         | 0.37<br>(-0.13, 0.86)     | 0.26<br>(-0.40, 0.90)     | 0.21<br>(-0.45, 0.86)     | 0.12<br>(-0.39, 0.61)     | 0.00<br>(-0.65, 0.64)     |                           | -0.04<br>(-0.37, 0.28)       | -0.10<br>(-0.82, 0.60) | -0.10<br>(-0.45, 0.24)       | -0.12<br>(-0.60, 0.34)    | ** -0.63**<br>(-0.96, -0.33) |
| PBAG       | ** 0.41**<br>(0.03, 0.79) | 0.30<br>(-0.27, 0.87)     | 0.25<br>(-0.33, 0.83)     | 0.16<br>(-0.25, 0.58)     | 0.04<br>(-0.55, 0.64)     | 0.04<br>(-0.28, 0.37)     |                              | -0.06<br>(-0.72, 0.61) | -0.06<br>(-0.30, 0.19)       | -0.08<br>(-0.47, 0.31)    | ** -0.59**<br>(-0.76, -0.43) |
| INCUPWRAP  | 0.47<br>(-0.29, 1.23)     | 0.36<br>(-0.51, 1.23)     | 0.31<br>(-0.56, 1.18)     | 0.22<br>(-0.52, 0.96)     | 0.10<br>(-0.72, 0.93)     | 0.10<br>(-0.60, 0.82)     | 0.06<br>(-0.61, 0.72)        |                        | 0.00<br>(-0.62, 0.62)        | -0.02<br>(-0.75, 0.71)    | -0.53<br>(-1.19, 0.11)       |
| PWRAP      | ** 0.47**<br>(0.02, 0.92) | 0.36<br>(-0.26, 0.97)     | 0.31<br>(-0.31, 0.92)     | 0.22<br>(-0.20, 0.62)     | 0.10<br>(-0.44, 0.65)     | 0.10<br>(-0.24, 0.45)     | 0.06<br>(-0.19, 0.30)        | -0.00<br>(-0.62, 0.62) |                              | -0.03<br>(-0.41, 0.36)    | ** -0.54**<br>(-0.75, -0.34) |
| PWRAPPCAP  | 0.50<br>(-0.05, 1.04)     | 0.38<br>(-0.31, 1.07)     | 0.33<br>(-0.35, 1.01)     | 0.24<br>(-0.29, 0.77)     | 0.13<br>(-0.54, 0.79)     | 0.12<br>(-0.34, 0.60)     | 0.08<br>(-0.31, 0.47)        | 0.02<br>(-0.71, 0.75)  | 0.03<br>(-0.36, 0.41)        |                           | ** -0.51**<br>(-0.88, -0.15) |
| RCARE      | ** 1.01**<br>(0.60, 1.42) | ** 0.89**<br>(0.31, 1.49) | ** 0.84**<br>(0.26, 1.43) | ** 0.75**<br>(0.35, 1.16) | ** 0.64**<br>(0.06, 1.23) | ** 0.63**<br>(0.33, 0.96) | ** 0.59**<br>(0.43, 0.76)    | 0.53<br>(-0.11, 1.19)  | ** 0.54**<br>(0.34, 0.75)    | ** 0.51**<br>(0.15, 0.88) |                              |

**eFigure 9.** Split between direct and indirect evidence for sensitivity analysis by evaluating plastic bag and plastic wrap as separate interventions for the primary outcome: Mean core body temperature (axillary or rectal) at admission or within first 2 hours of life

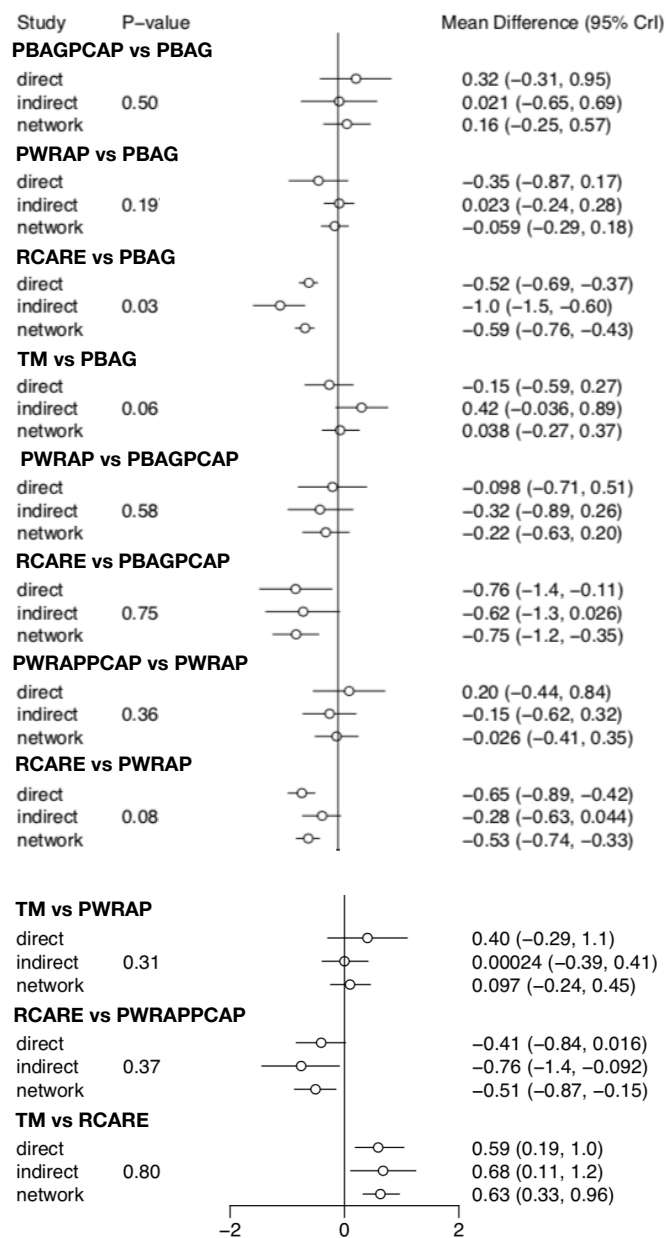

**eFigure 10.** Sensitivity analysis by evaluating studies in which the mean gestational age of the included neonates was  $\leq 30$  weeks for the primary outcome: Mean core body temperature (axillary or rectal) at admission or within first 2 hours of life. A. Network plot; B. SUCRA plot; C. Forest plot depicting the network estimates [MD (95% CrI)] of the various interventions with “Routine Care” as the common comparator

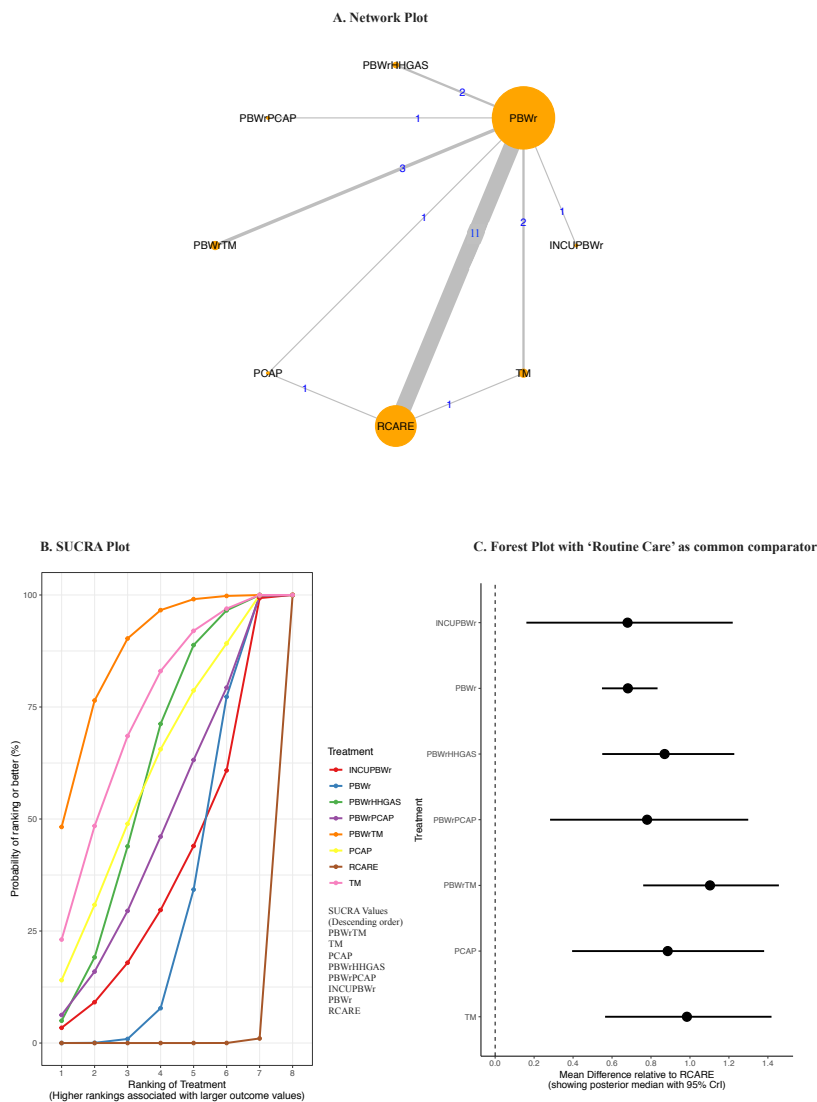

**eFigure 11.** League plot depicting the network estimates for sensitivity analysis by evaluating studies in which the mean gestational age of the included neonates was  $\leq 30$  weeks for the primary outcome: Mean core body temperature (axillary or rectal) at admission or within first 2 hours of life

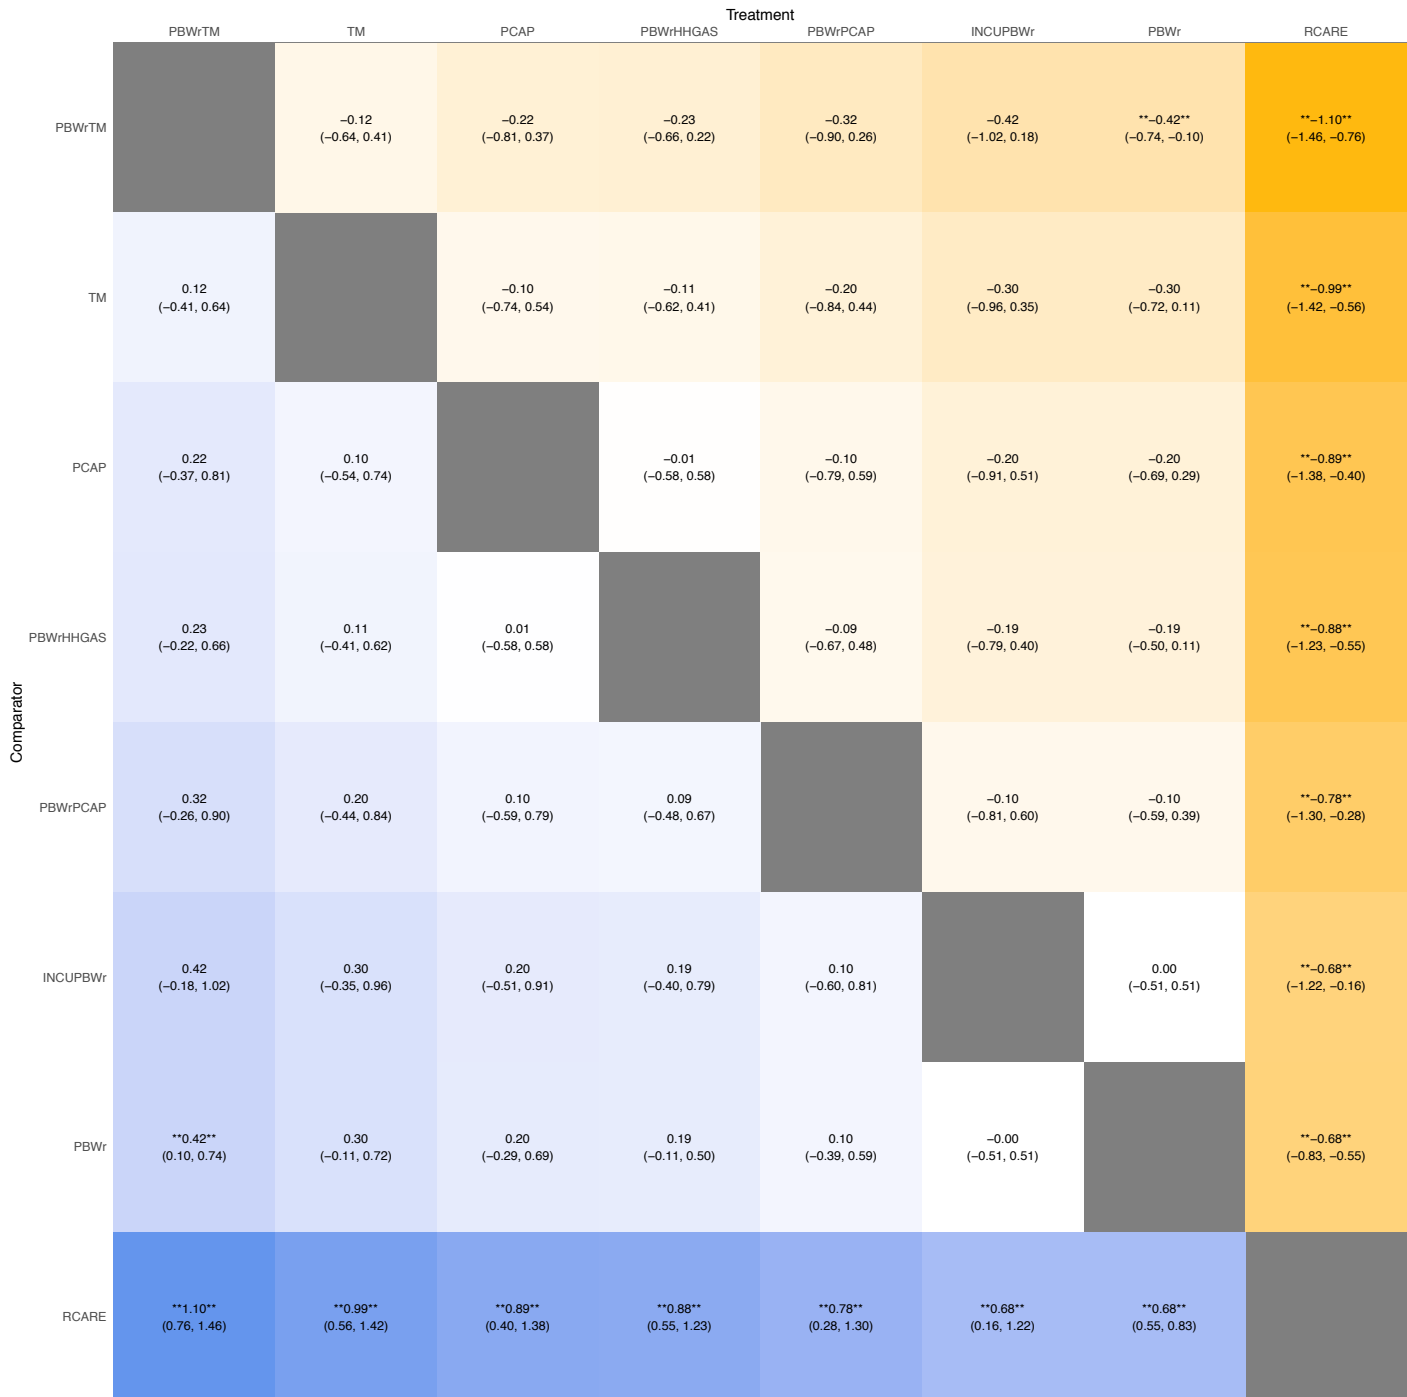

**eFigure 12.** Split between direct and indirect evidence for sensitivity analysis by evaluating studies in which the mean gestational age of the included neonates was  $\leq 30$  weeks for the primary outcome: Mean core body temperature (axillary or rectal) at admission or within first 2 hours of life

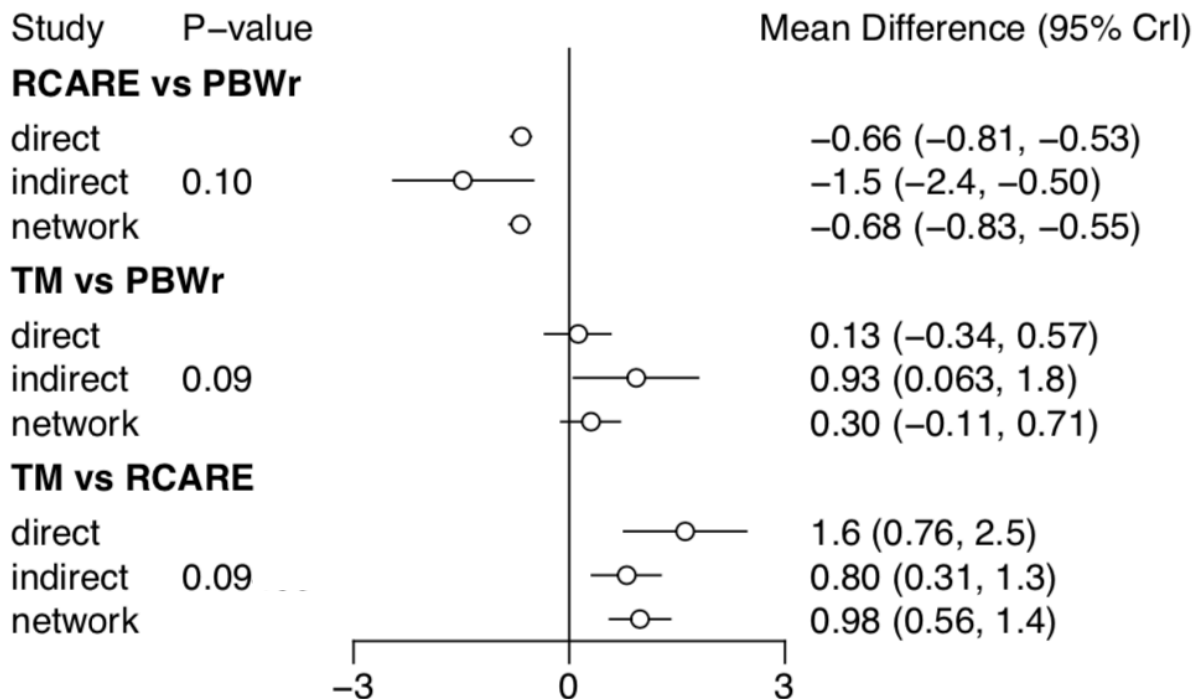



**eFigure 13.** Meta-regression with gestational age as covariate - A. Regression Plot, B. Forest Plots with 'Routine Care' as comparator for gestational age = 24 weeks, C. Forest Plots with 'Routine Care' as comparator for gestational age = 30 weeks, D. Forest Plots with 'Routine Care' as comparator for gestational age = 34 weeks,

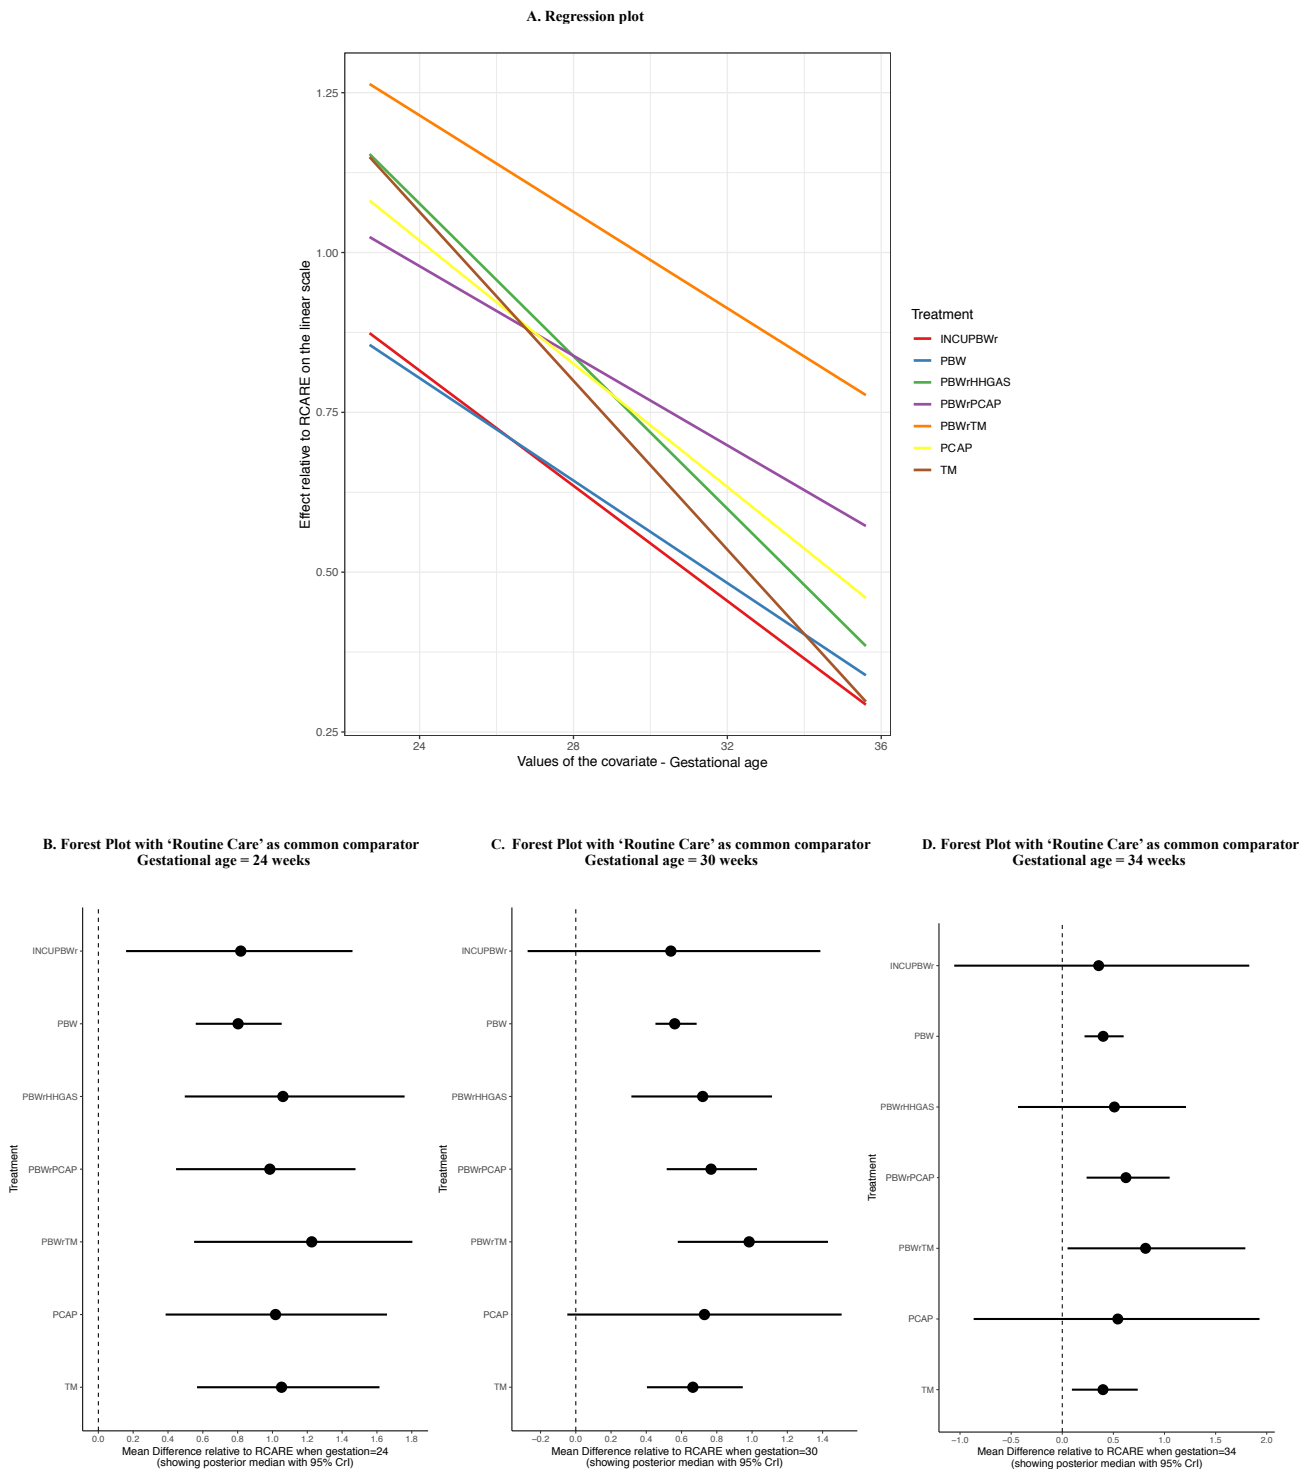

**eFigure 14.** Sensitivity analysis by evaluating drying versus no drying before wrapping in a plastic bag / wrap for the primary outcome: Mean core body temperature (axillary or rectal) at admission or within first 2 hours of life. A. Network plot; B. SUCRA plot; C. Forest plot depicting the network estimates [MD (95% CrI)] of the various interventions with “Routine Care” as the common comparator

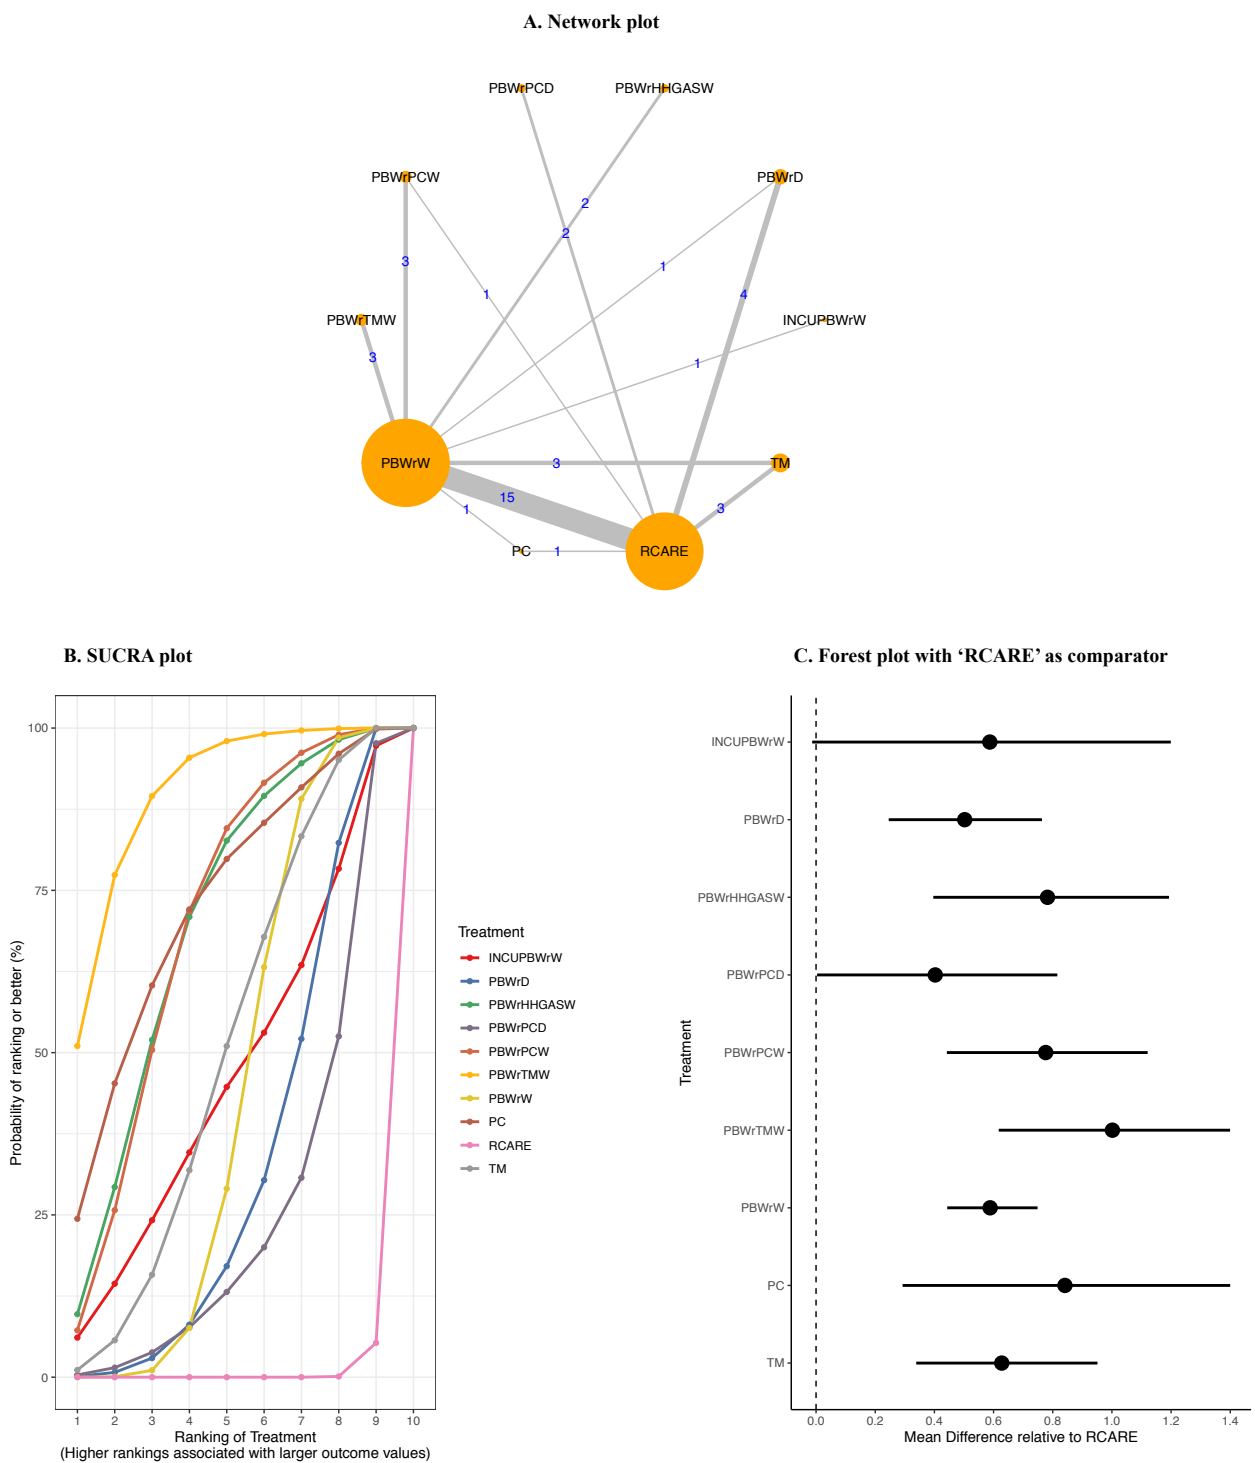

**eFigure 15.** League plot depicting the network estimates for sensitivity analysis - Drying versus no drying before wrapping in a plastic bag / wrap for the primary outcome: Mean core body temperature (axillary or rectal) at admission or within first 2 hours of life

|            |            | Treatment                        |                                  |                                  |                                  |                                  |                        |                                     |                                     |                                     |                                     |
|------------|------------|----------------------------------|----------------------------------|----------------------------------|----------------------------------|----------------------------------|------------------------|-------------------------------------|-------------------------------------|-------------------------------------|-------------------------------------|
|            |            | PBWrTMW                          | PC                               | PBWrHHGASW                       | PBWrPCW                          | TM                               | INCUPBWrW              | PBWrW                               | PBWrD                               | PBWrPCD                             | RCARE                               |
| Comparator | PBWrTMW    |                                  | -0.16<br>(-0.82, 0.50)           | -0.22<br>(-0.73, 0.30)           | -0.23<br>(-0.71, 0.25)           | -0.37<br>(-0.83, 0.10)           | -0.41<br>(-1.11, 0.28) | <b>**</b> -0.41**<br>(-0.77, -0.05) | <b>**</b> -0.50**<br>(-0.97, -0.04) | <b>**</b> -0.60**<br>(-1.16, -0.04) | <b>**</b> -1.00**<br>(-1.40, -0.62) |
|            | PC         | 0.16<br>(-0.50, 0.82)            |                                  | -0.06<br>(-0.72, 0.61)           | -0.06<br>(-0.70, 0.57)           | -0.21<br>(-0.82, 0.42)           | -0.25<br>(-1.06, 0.55) | -0.25<br>(-0.80, 0.30)              | -0.34<br>(-0.95, 0.26)              | -0.44<br>(-1.12, 0.25)              | <b>**</b> -0.84**<br>(-1.40, -0.29) |
|            | PBWrHHGASW | 0.22<br>(-0.30, 0.73)            | 0.06<br>(-0.61, 0.72)            |                                  | -0.01<br>(-0.50, 0.48)           | -0.15<br>(-0.62, 0.33)           | -0.20<br>(-0.89, 0.49) | -0.20<br>(-0.57, 0.17)              | -0.28<br>(-0.75, 0.18)              | -0.38<br>(-0.95, 0.18)              | <b>**</b> -0.79**<br>(-1.19, -0.40) |
|            | PBWrPCW    | 0.23<br>(-0.25, 0.71)            | 0.06<br>(-0.57, 0.70)            | 0.01<br>(-0.48, 0.50)            |                                  | -0.15<br>(-0.57, 0.30)           | -0.19<br>(-0.85, 0.48) | -0.19<br>(-0.50, 0.13)              | -0.27<br>(-0.70, 0.14)              | -0.37<br>(-0.90, 0.15)              | <b>**</b> -0.78**<br>(-1.12, -0.44) |
|            | TM         | 0.37<br>(-0.10, 0.83)            | 0.21<br>(-0.42, 0.82)            | 0.15<br>(-0.33, 0.62)            | 0.15<br>(-0.30, 0.57)            |                                  | -0.04<br>(-0.71, 0.61) | -0.04<br>(-0.35, 0.25)              | -0.13<br>(-0.54, 0.25)              | -0.23<br>(-0.74, 0.27)              | <b>**</b> -0.63**<br>(-0.95, -0.34) |
|            | INCUPBWrW  | 0.41<br>(-0.28, 1.11)            | 0.25<br>(-0.55, 1.06)            | 0.20<br>(-0.49, 0.89)            | 0.19<br>(-0.48, 0.85)            | 0.04<br>(-0.61, 0.71)            |                        | 0.00<br>(-0.58, 0.59)               | -0.09<br>(-0.74, 0.56)              | -0.18<br>(-0.91, 0.55)              | -0.59<br>(-1.20, 0.01)              |
|            | PBWrW      | <b>**</b> 0.41**<br>(0.05, 0.77) | 0.25<br>(-0.30, 0.80)            | 0.20<br>(-0.17, 0.57)            | 0.19<br>(-0.13, 0.50)            | 0.04<br>(-0.25, 0.35)            | -0.00<br>(-0.59, 0.58) |                                     | -0.09<br>(-0.38, 0.19)              | -0.19<br>(-0.62, 0.24)              | <b>**</b> -0.59**<br>(-0.75, -0.44) |
|            | PBWrD      | <b>**</b> 0.50**<br>(0.04, 0.97) | 0.34<br>(-0.26, 0.95)            | 0.28<br>(-0.18, 0.75)            | 0.27<br>(-0.14, 0.70)            | 0.13<br>(-0.25, 0.54)            | 0.09<br>(-0.56, 0.74)  | 0.09<br>(-0.19, 0.38)               |                                     | -0.10<br>(-0.58, 0.39)              | <b>**</b> -0.50**<br>(-0.76, -0.25) |
|            | PBWrPCD    | <b>**</b> 0.60**<br>(0.04, 1.16) | 0.44<br>(-0.25, 1.12)            | 0.38<br>(-0.18, 0.95)            | 0.37<br>(-0.15, 0.90)            | 0.23<br>(-0.27, 0.74)            | 0.18<br>(-0.55, 0.91)  | 0.19<br>(-0.24, 0.62)               | 0.10<br>(-0.39, 0.58)               |                                     | <b>**</b> -0.40**<br>(-0.82, -0.00) |
|            | RCARE      | <b>**</b> 1.00**<br>(0.62, 1.40) | <b>**</b> 0.84**<br>(0.29, 1.40) | <b>**</b> 0.79**<br>(0.40, 1.19) | <b>**</b> 0.78**<br>(0.44, 1.12) | <b>**</b> 0.63**<br>(0.34, 0.95) | 0.59<br>(-0.01, 1.20)  | <b>**</b> 0.59**<br>(0.44, 0.75)    | <b>**</b> 0.50**<br>(0.25, 0.76)    | <b>**</b> 0.40**<br>(0.00, 0.82)    |                                     |

**eFigure 16** - League plot depicting the network estimate [RR (95% CrI)] for primary outcome: Moderate or severe hypothermia [defined as core body temperature (axillary or rectal temperature) less than 36 degree Celsius] at admission or within 2 hours of life.

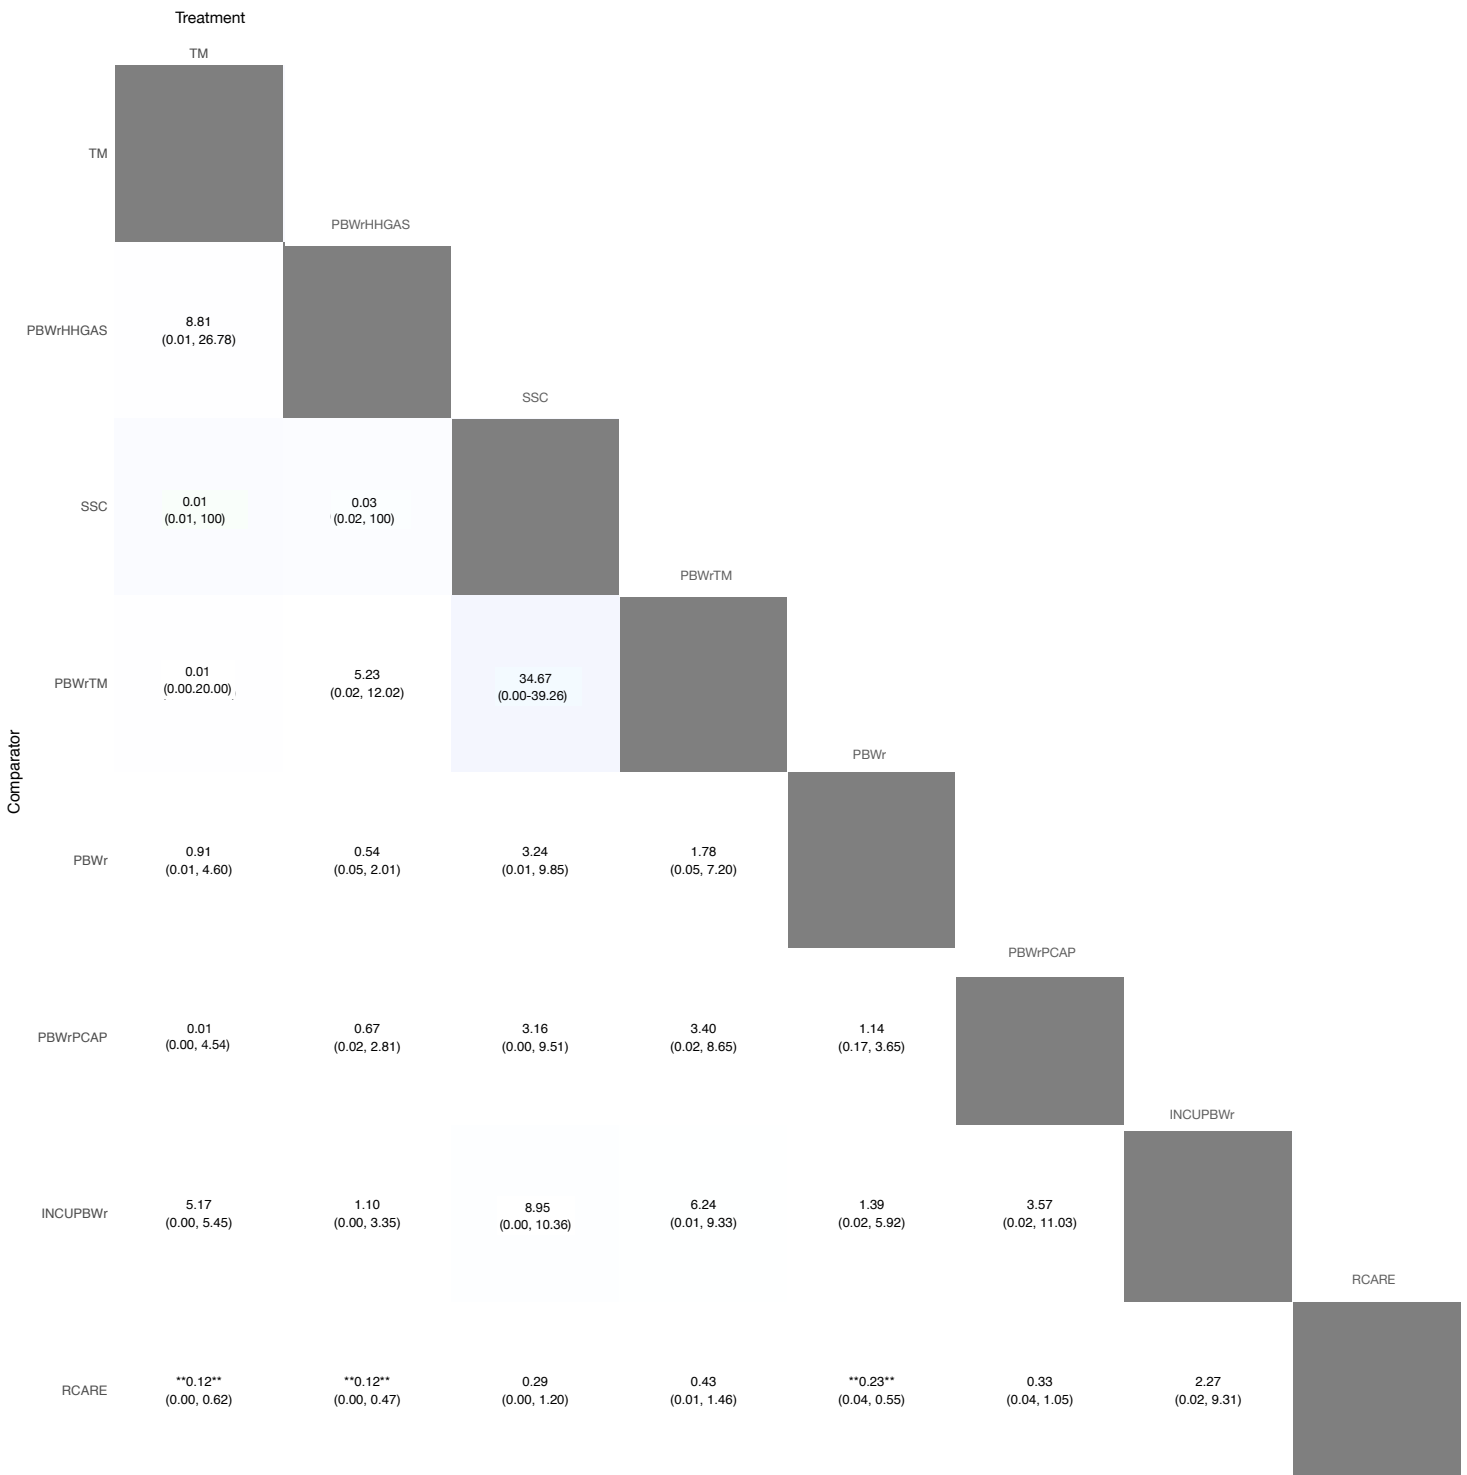

**eFigure 17.** Direct evidence from the pair wise comparisons for the primary outcome: Moderate or severe hypothermia [defined as core body temperature (axillary or rectal temperature) less than 36 degree Celsius] at admission or within 2 hours of life.

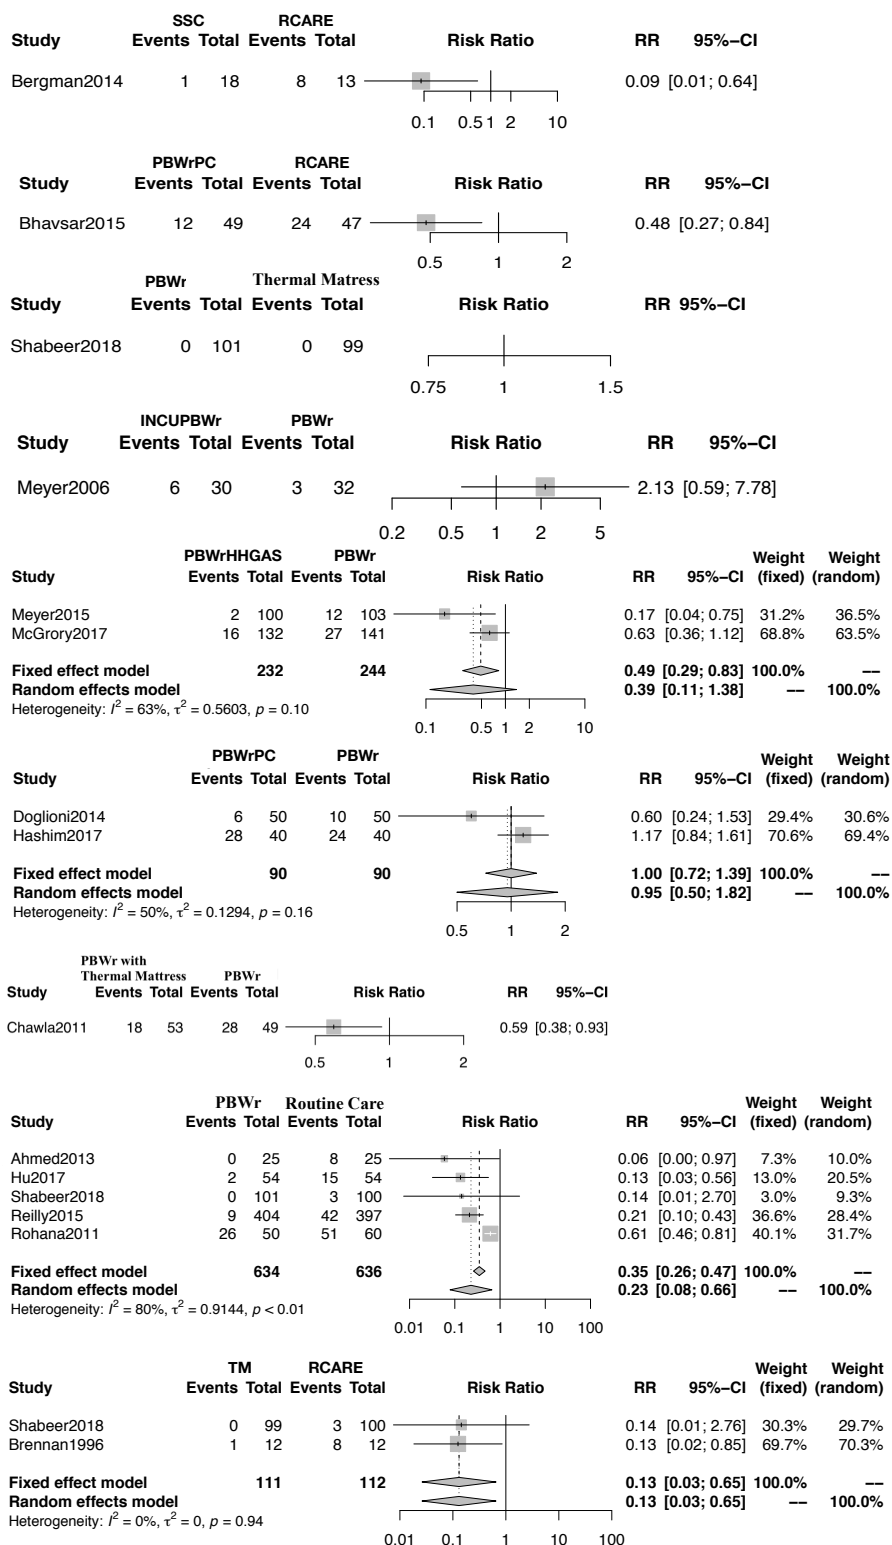

**eFigure 18.** Split between direct and indirect evidence for primary outcome: Moderate or severe hypothermia [defined as core body temperature (axillary or rectal temperature) less than 36 degree Celsius] at admission or within 2 hours of life.

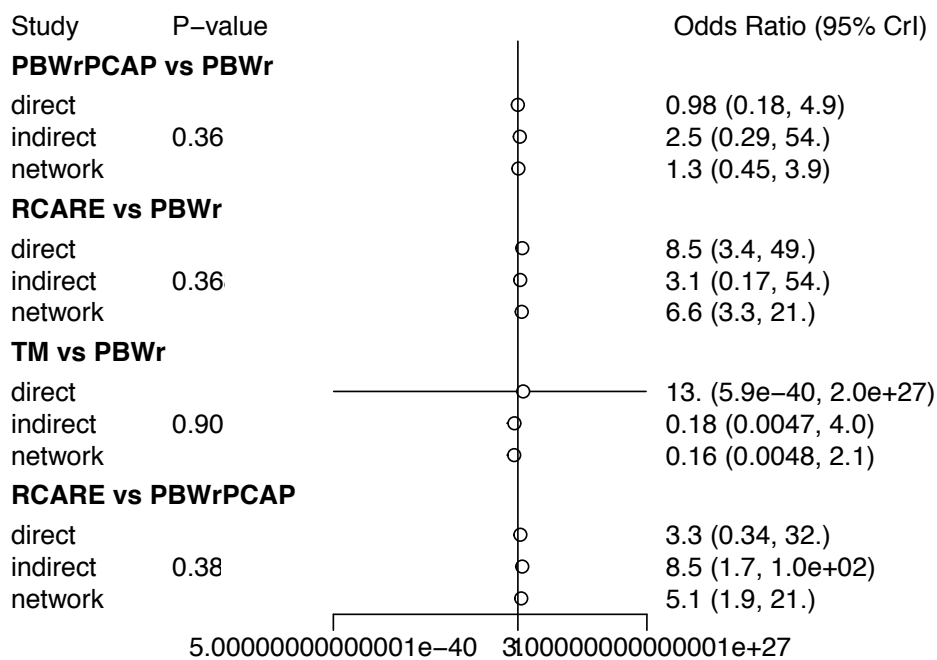

**eFigure 19.** Sensitivity analysis by evaluating any hypothermia (defined as core body temperature less than 36.5 degree Celsius at admission or within 1-2 hours of life). A. Network plot; B. SUCRA plot; C. Forest plot depicting the network estimates [MD (95% CrI)] of the various interventions with “Routine Care” as the common comparator.

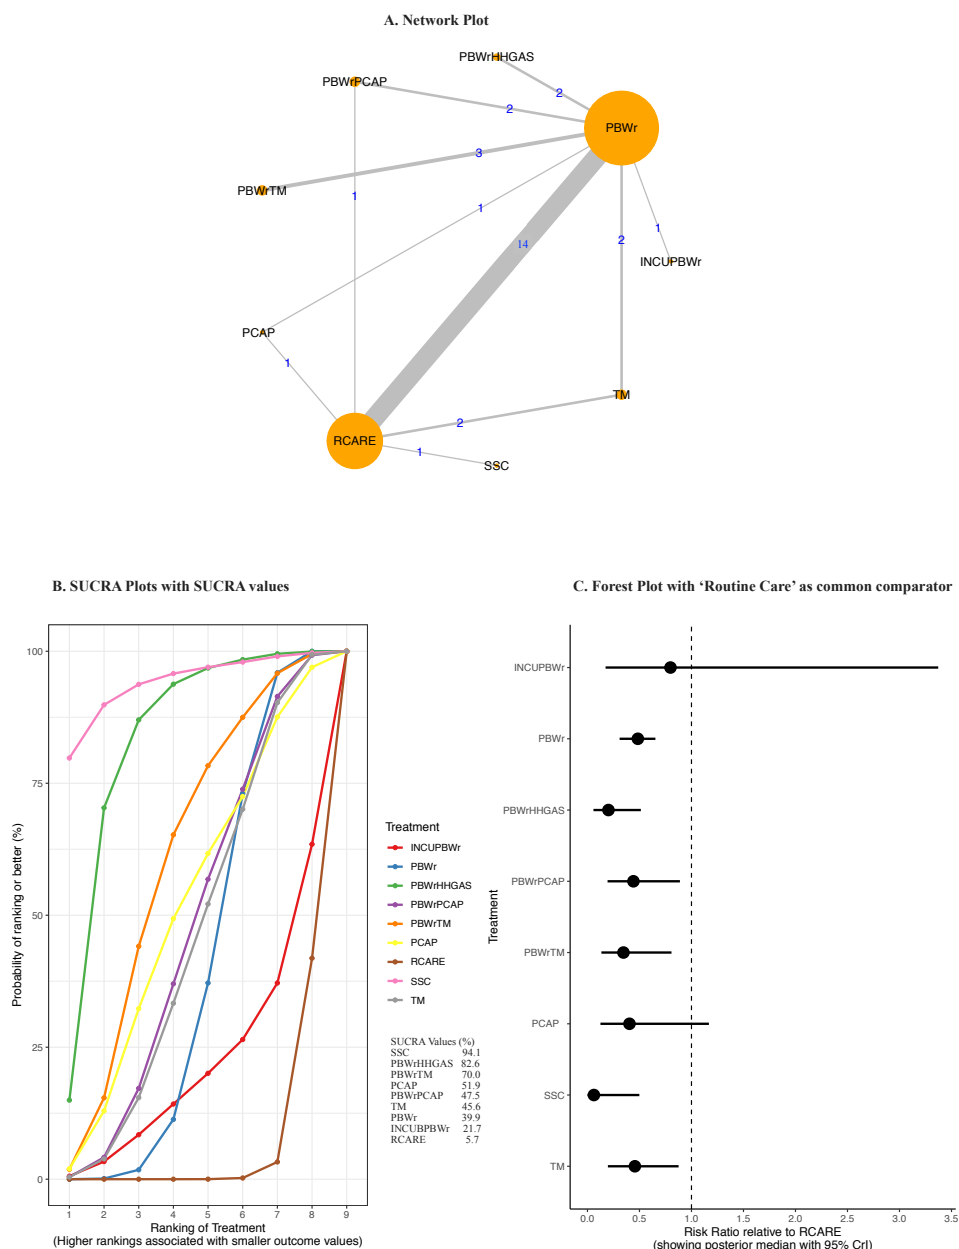

**eFigure 20** - League plot depicting the network estimate [RR (95% CrI)] for sensitivity analysis - Any hypothermia (defined as core body temperature less than 36.5 degree Celsius at admission or within 1-2 hours of life)

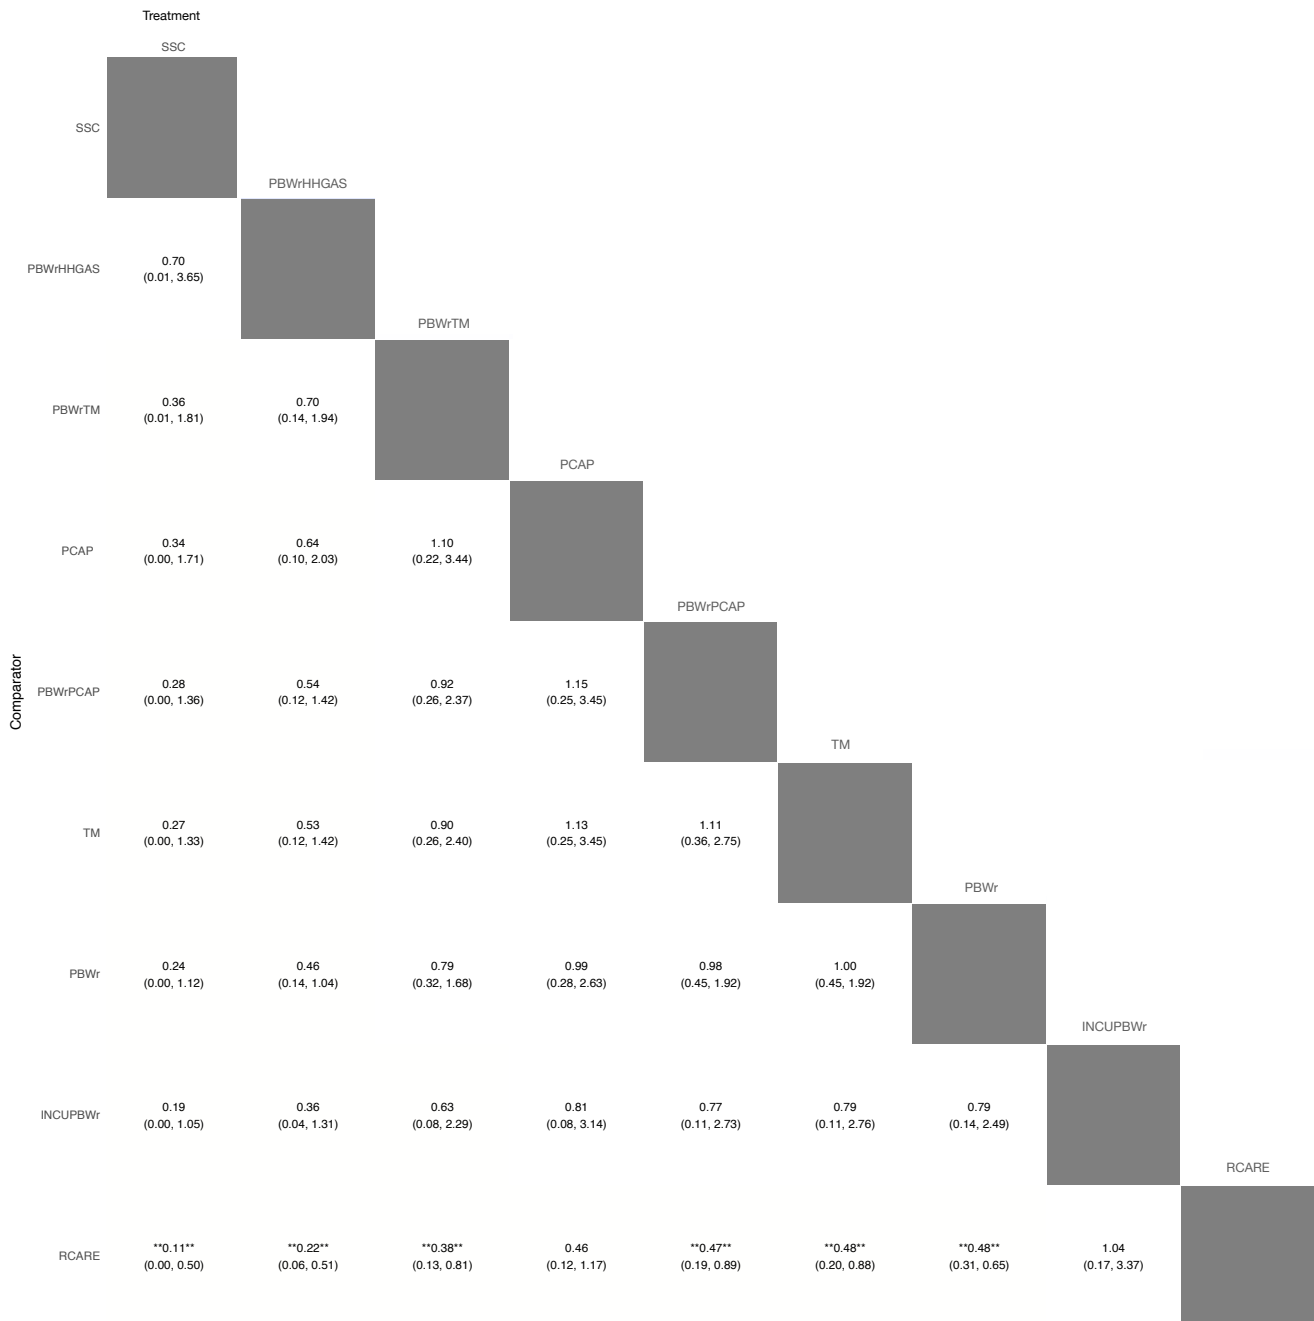



**eFigure 21.** Split between direct and indirect evidence for sensitivity analysis - Any hypothermia (defined as core body temperature less than 36.5 degree Celsius at admission or within 1-2 hours of life)

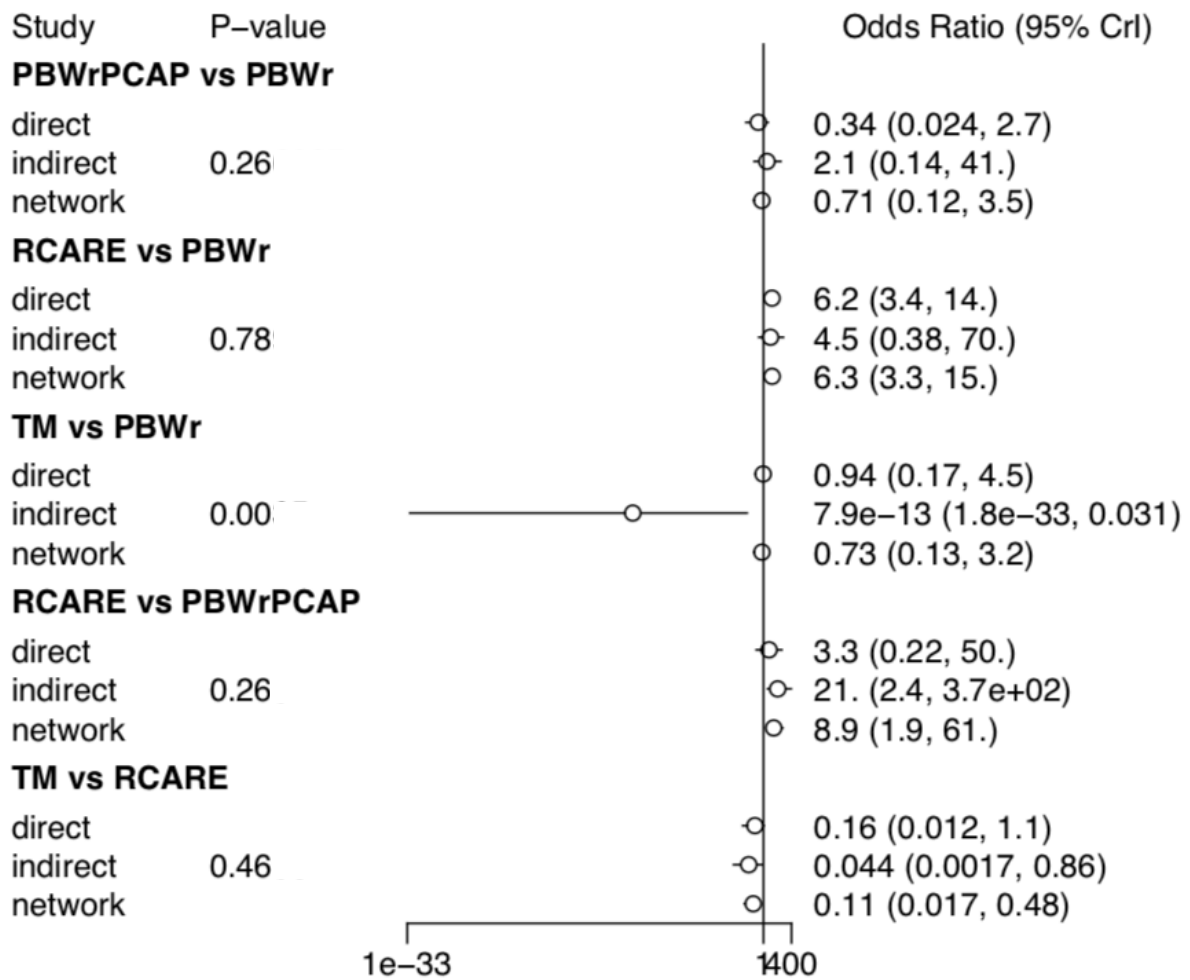

**eFigure 22.** Direct evidence from the pair wise comparisons for sensitivity analysis - Any hypothermia (defined as core body temperature less than 36.5 degree Celsius at admission or within 1-2 hours of life)

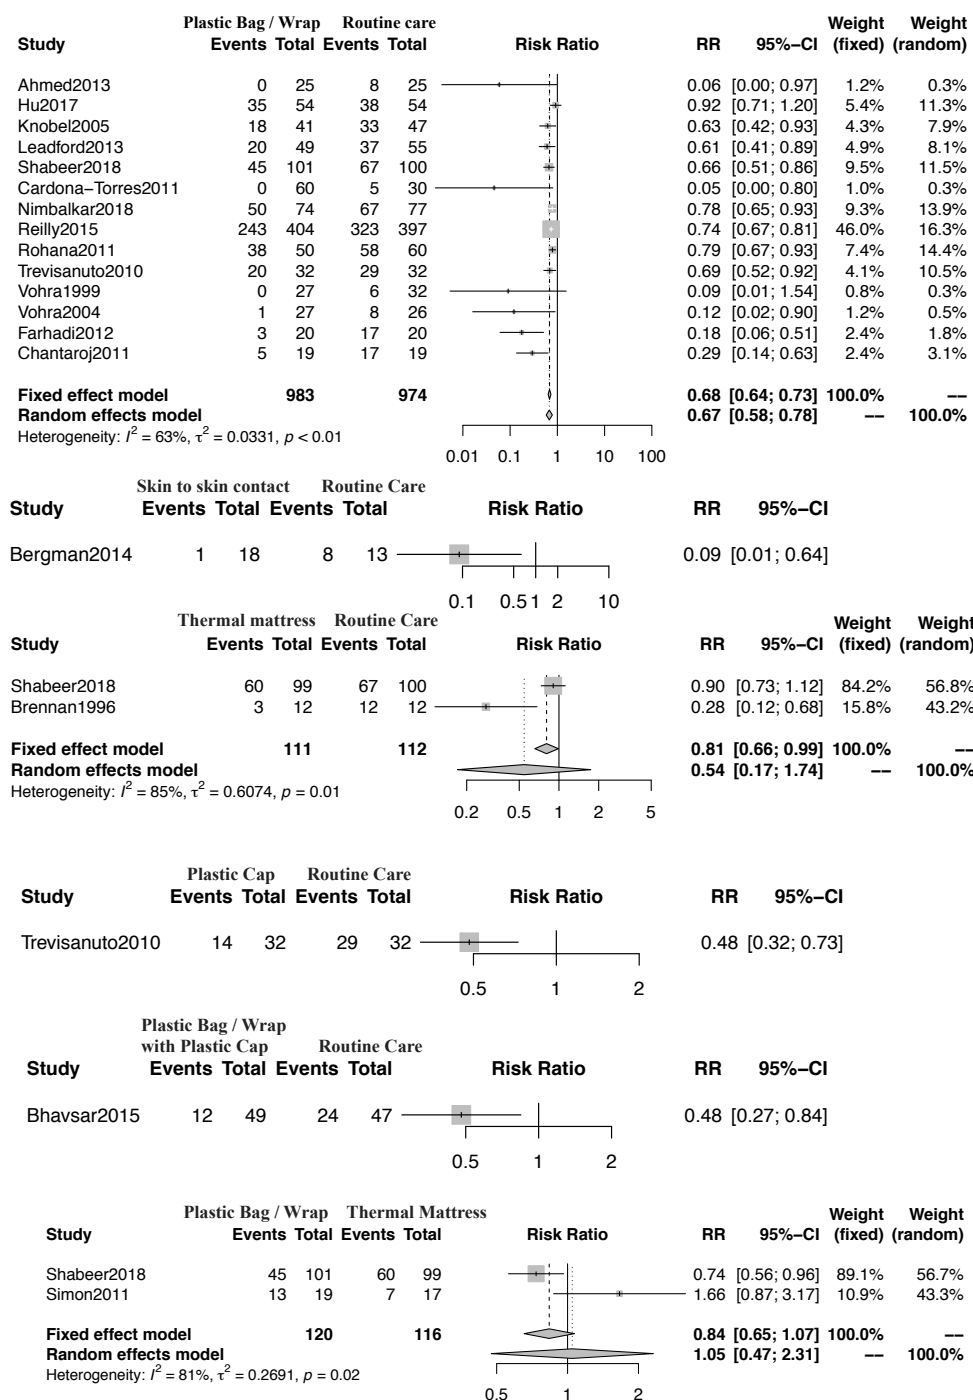

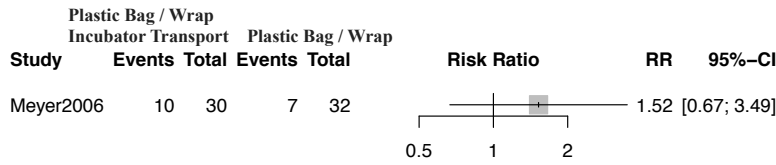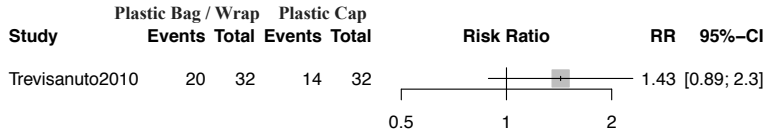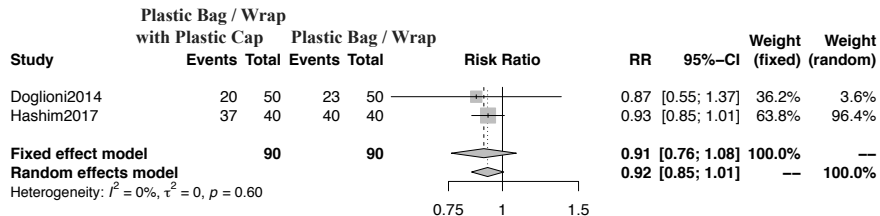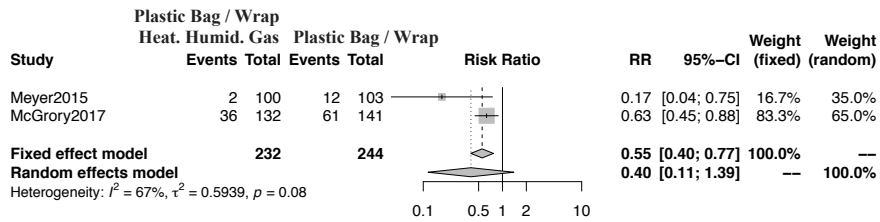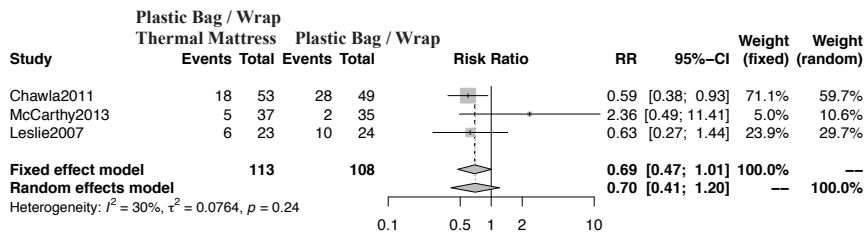

**Figure 23.** Mortality before discharge. A. Network plot; B. SUCRA plot; C. Forest plot depicting the network estimates [MD (95% CrI)] of the various interventions with “Routine Care” as the common comparator

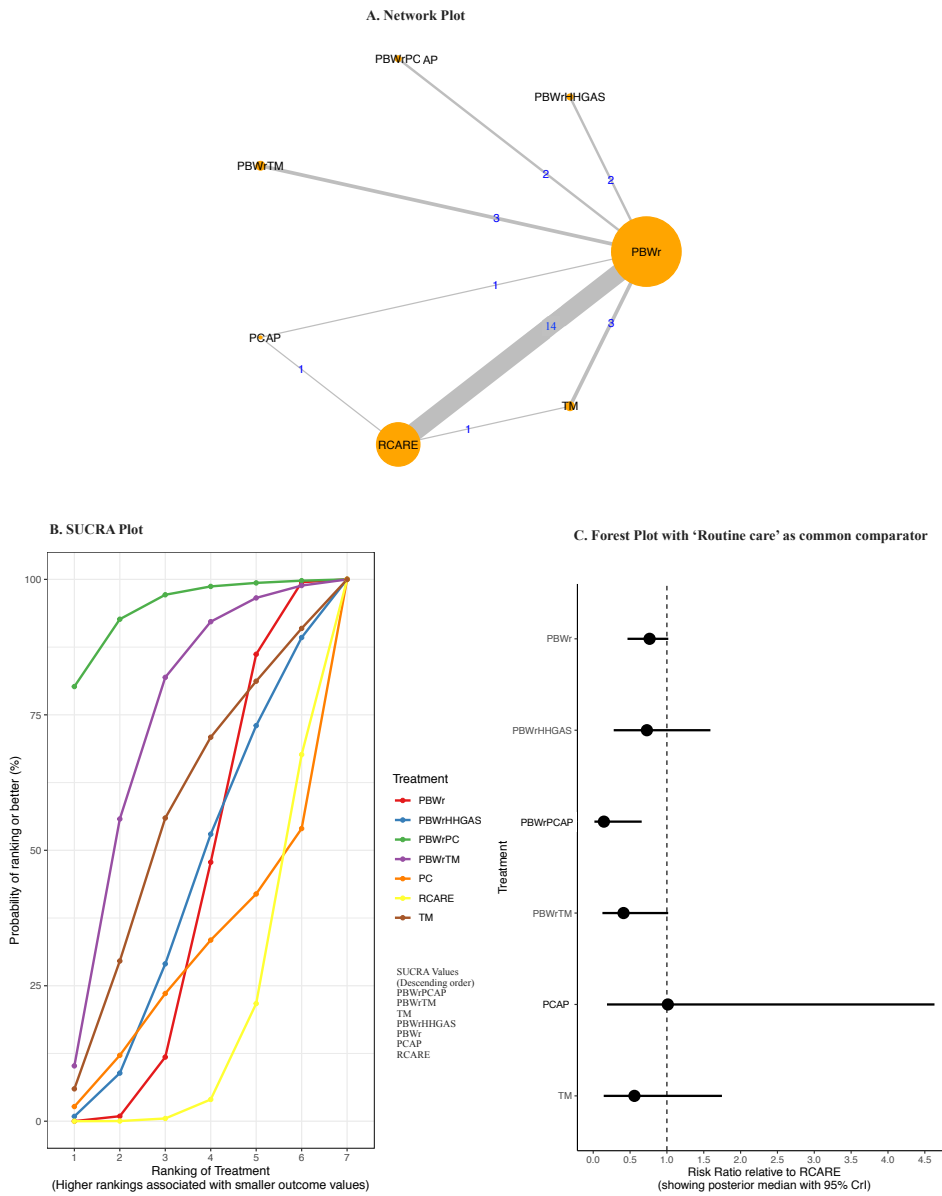

**eFigure 24** - League plot depicting the network estimate [RR (95% CrI)] for mortality before discharge.

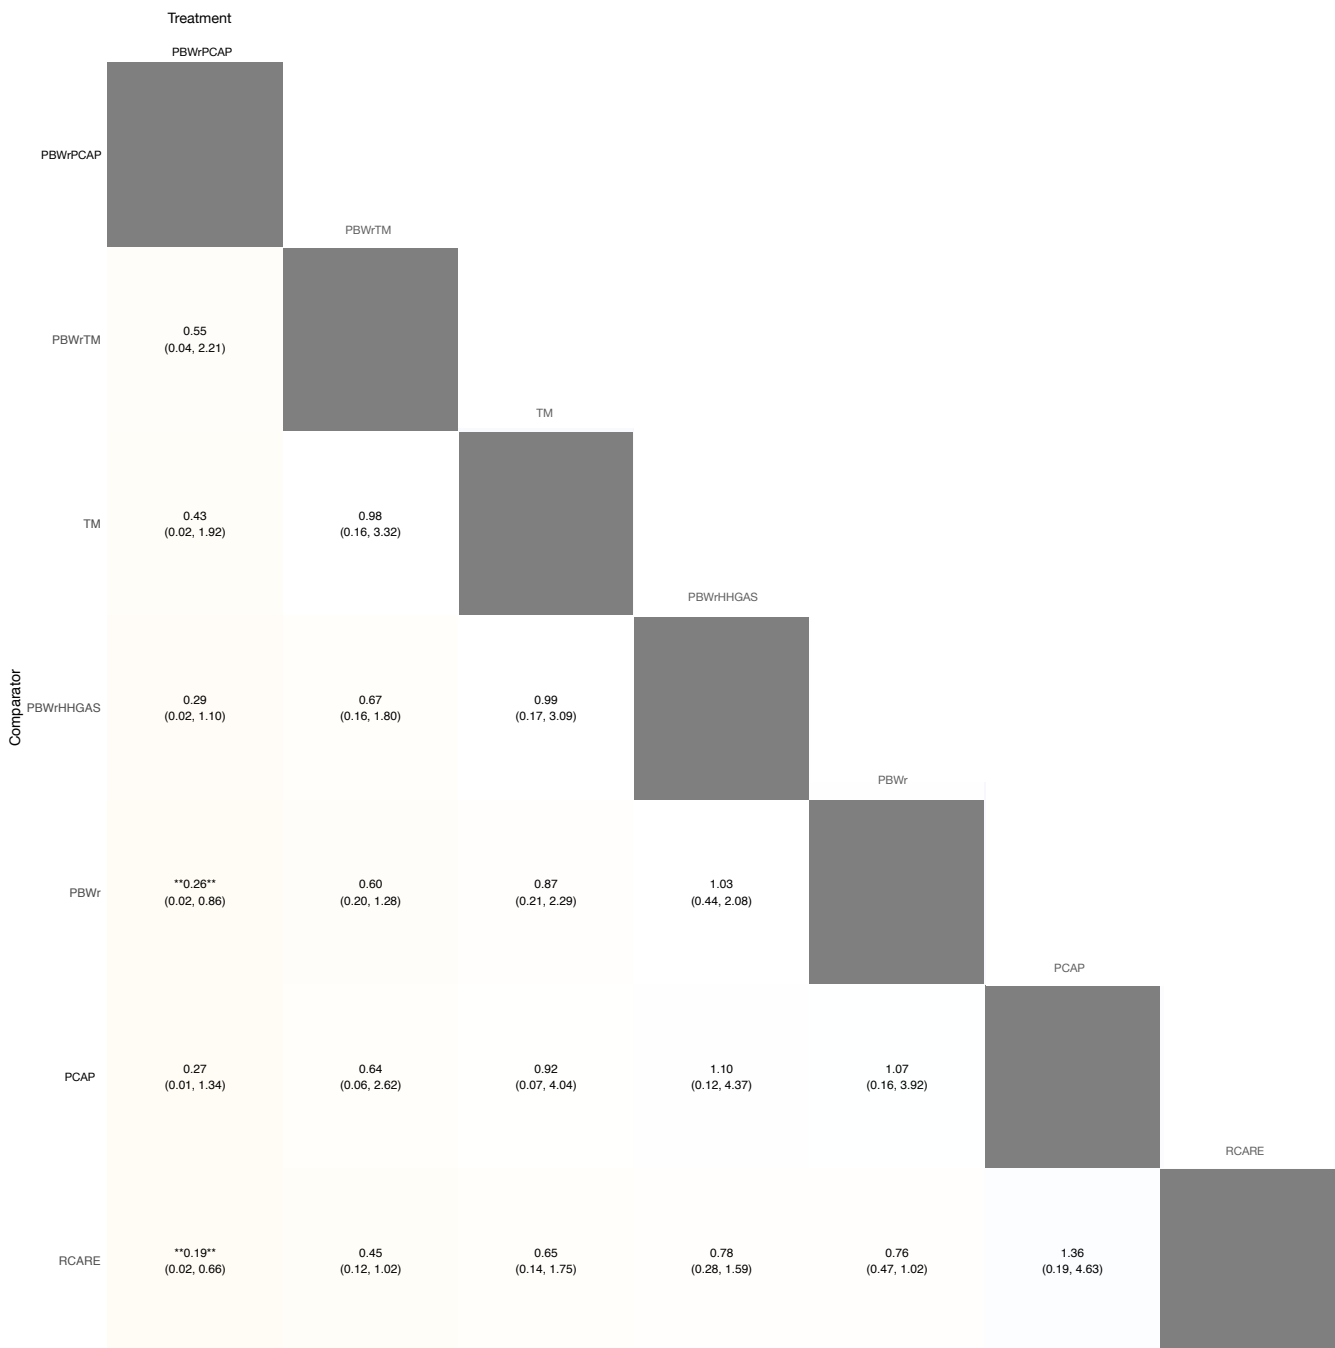

**eFigure 25.** Split between direct and indirect evidence for mortality before discharge.

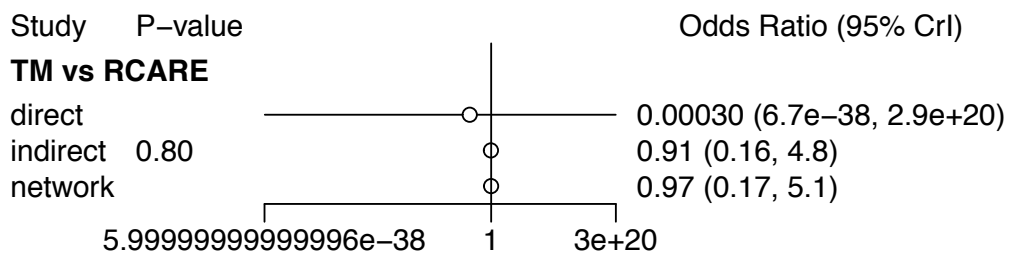

**eFigure 26.** Direct evidence from the pair wise comparisons for mortality before discharge.

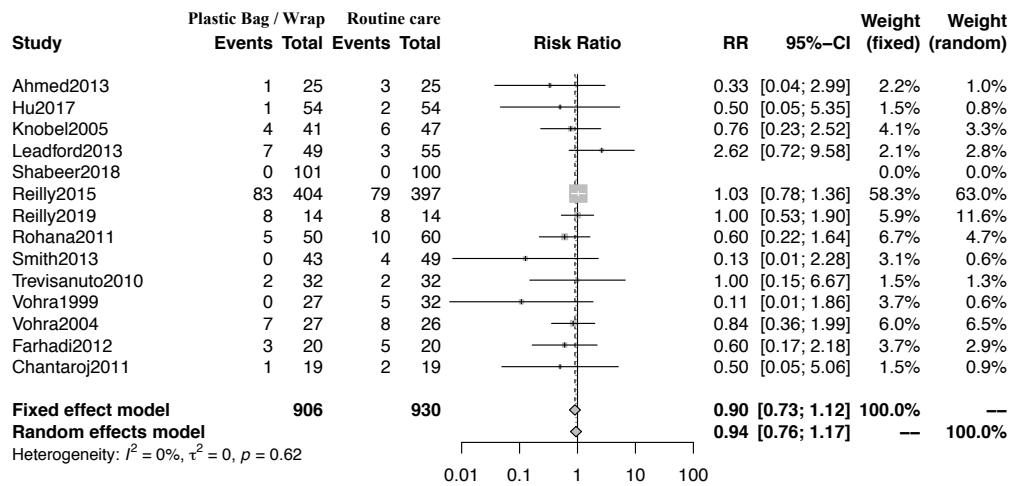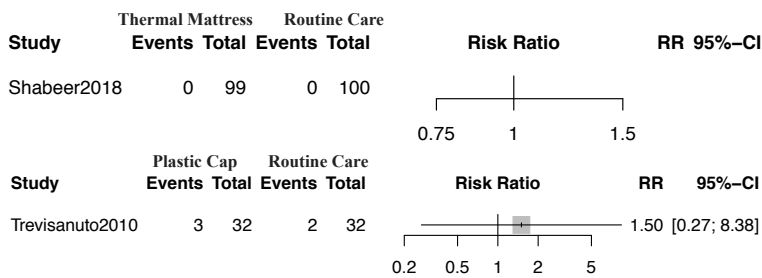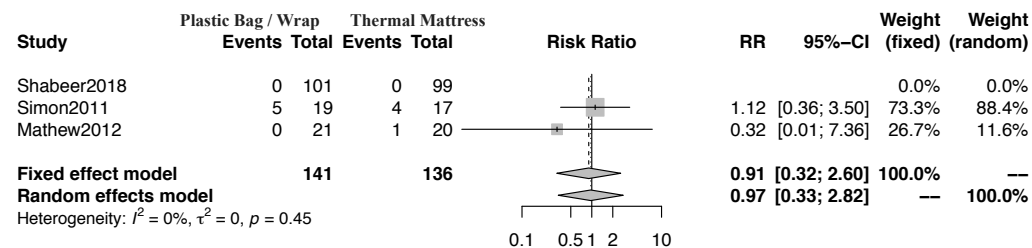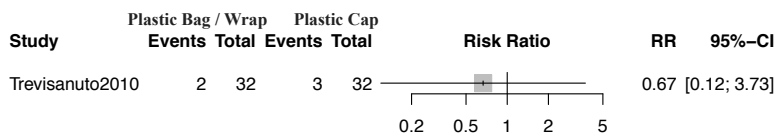

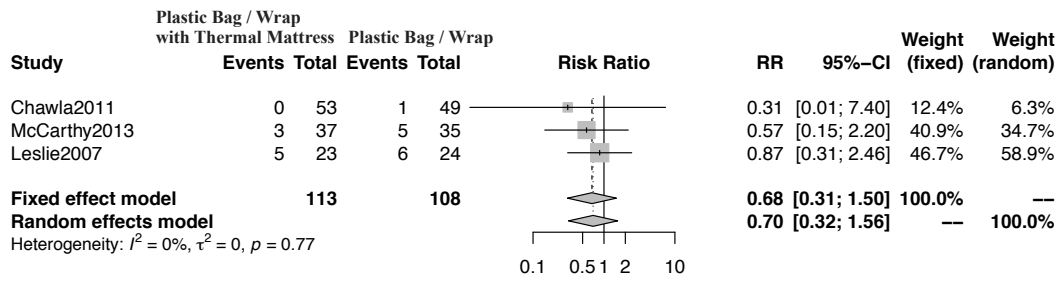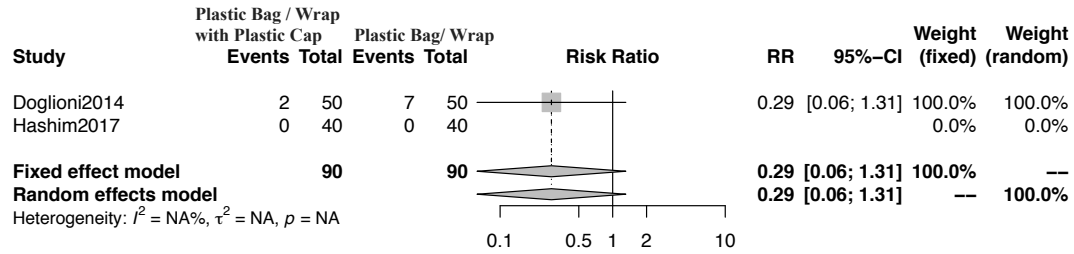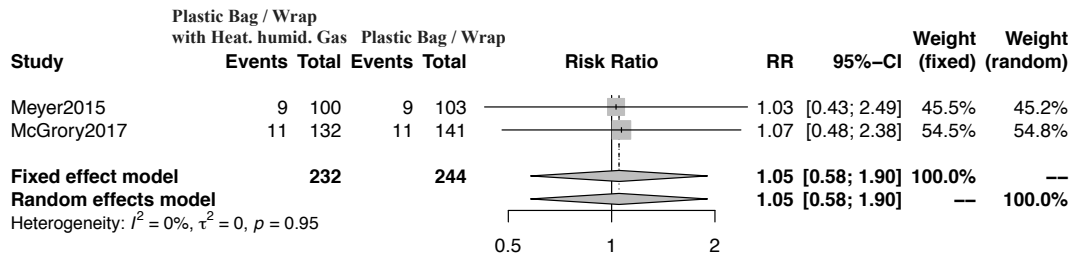



**eFigure 27.** Hyperthermia [defined as core body temperature (axillary or rectal) more than 37.5 degree Celsius] at admission or within 2 hours of life. A. Network plot; B. SUCRA plot; C. Forest plot depicting the network estimates [MD (95% CrI)] of the various interventions with “Routine Care” as the common comparator

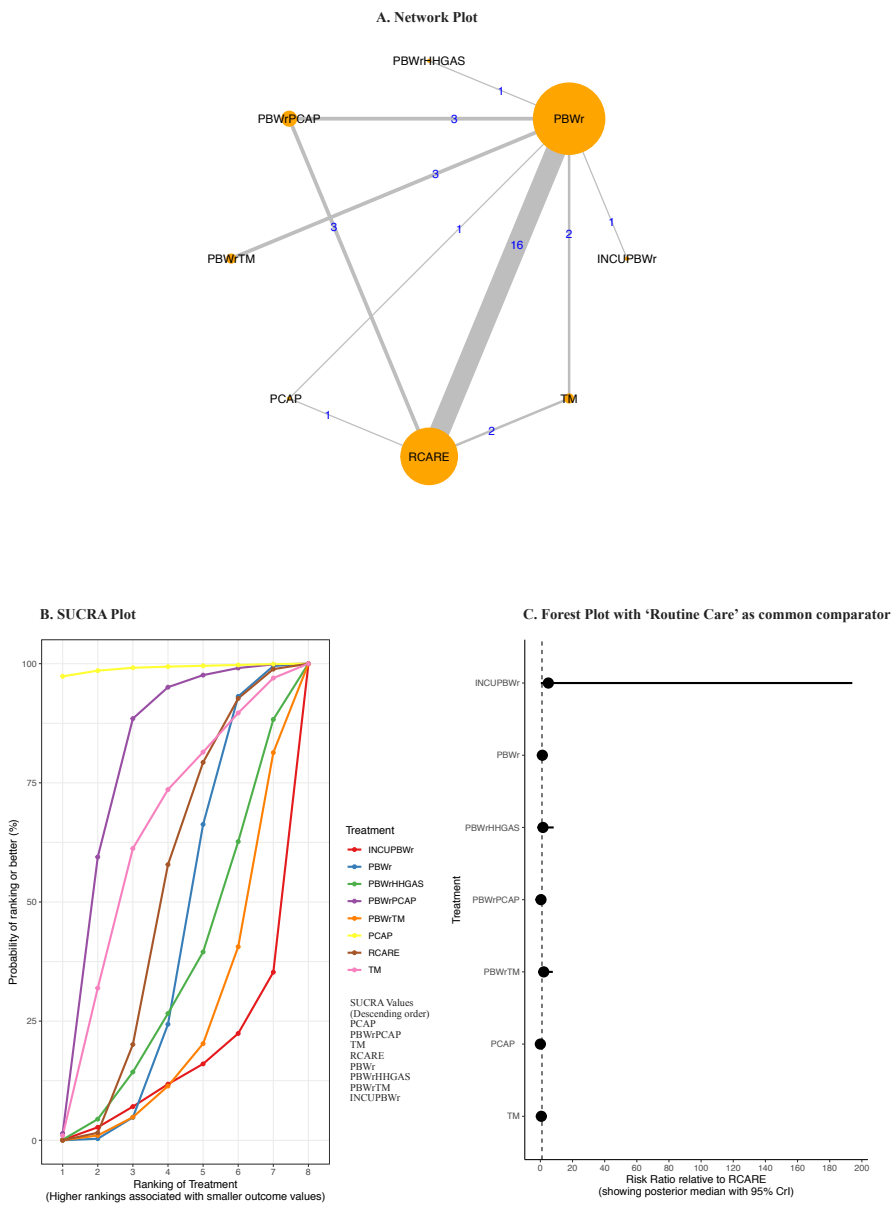

**eFigure 28** - League plot depicting the network estimate [RR (95% CrI)] for hyperthermia [defined as core body temperature (axillary or rectal) more than 37.5 degree Celsius] at admission or within 2 hours of life.

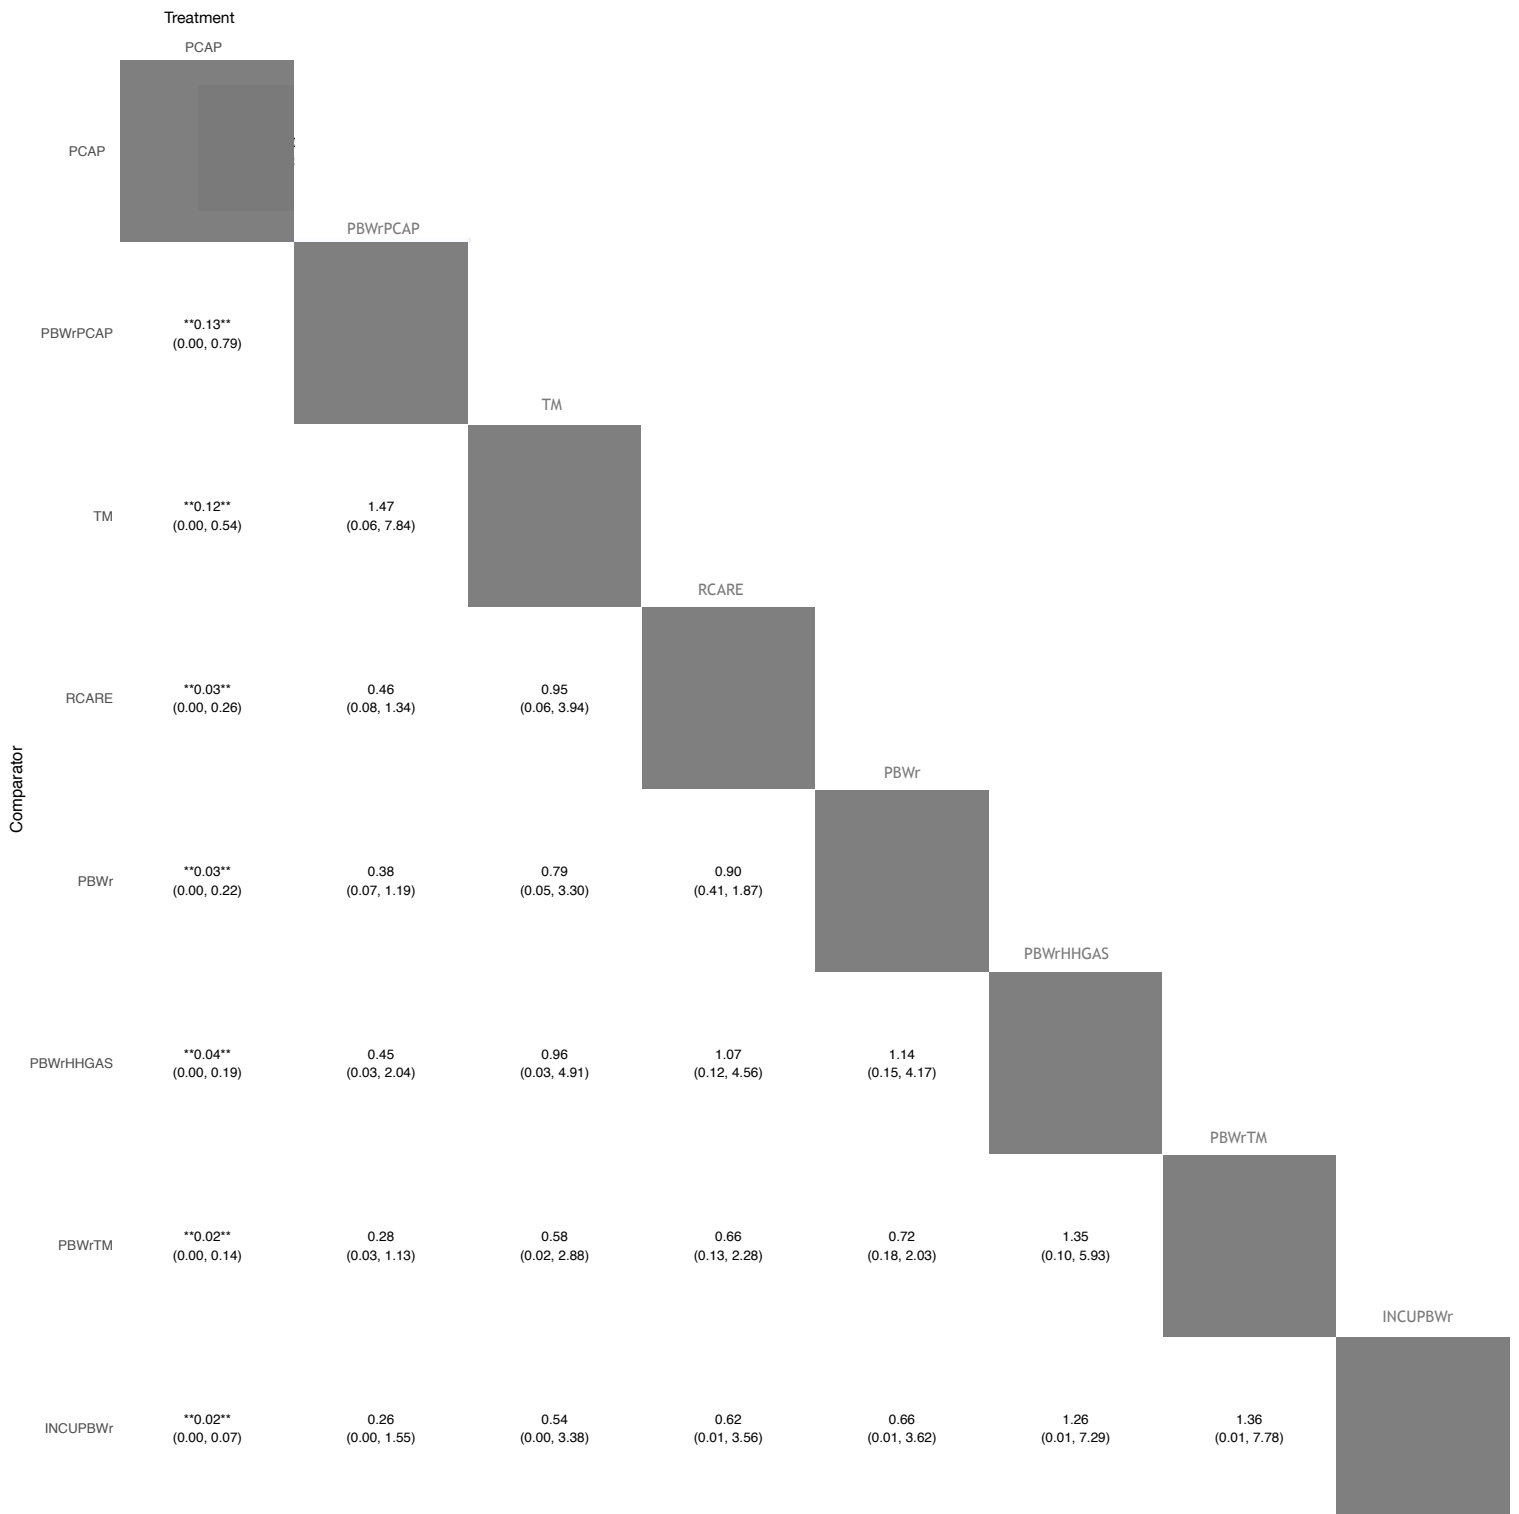

**eFigure 29.** Split between direct and indirect evidence for hyperthermia [defined as core body temperature (axillary or rectal) more than 37.5 degree Celsius] at admission or within 2 hours of life.

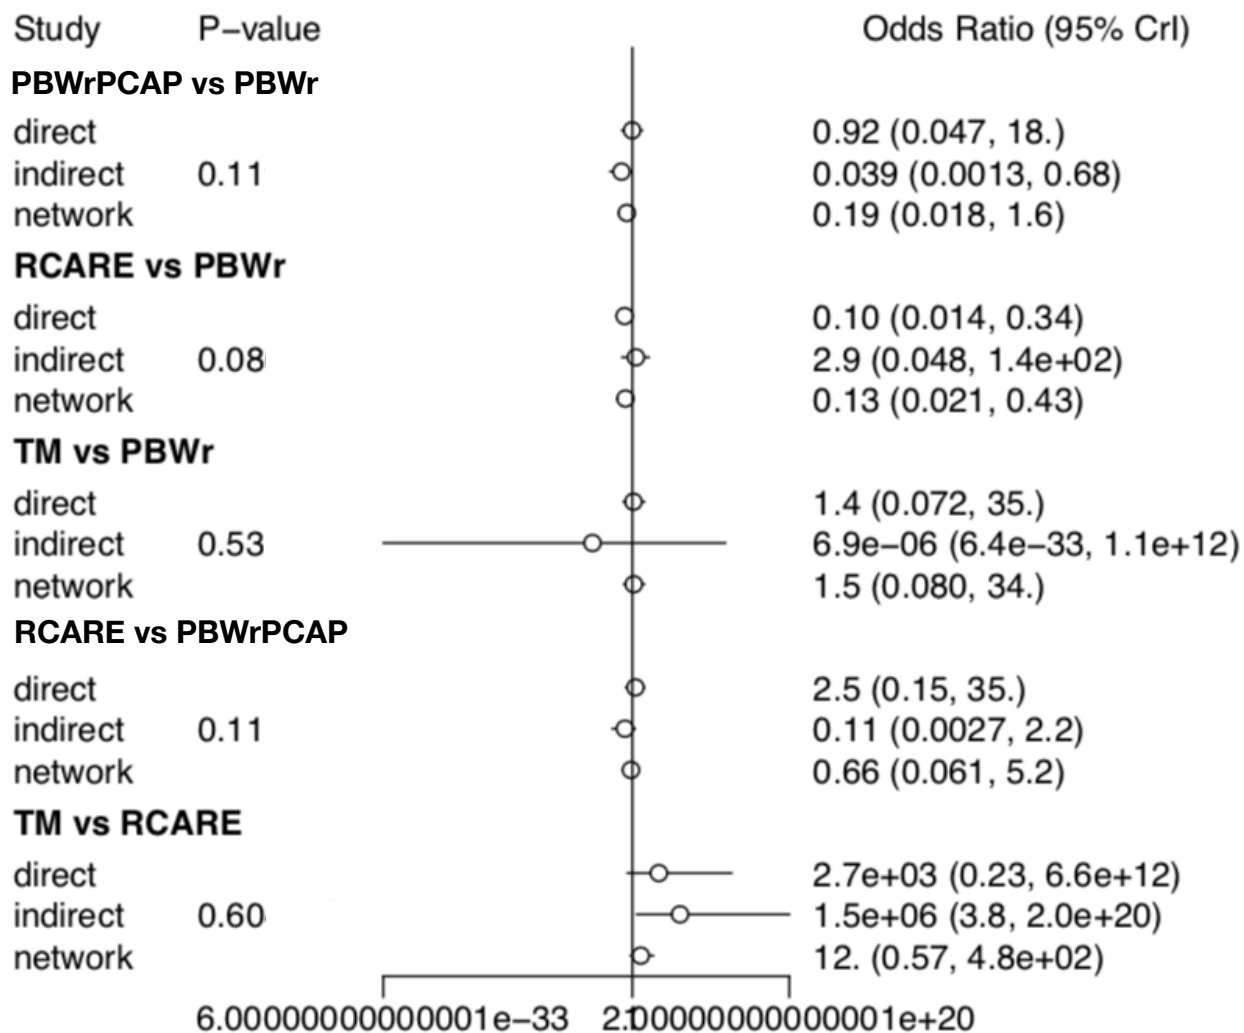

**eFigure 30.** Direct evidence from the pair wise comparisons for hyperthermia [defined as core body temperature (axillary or rectal) more than 37.5 degree Celsius] at admission or within 2 hours of life.

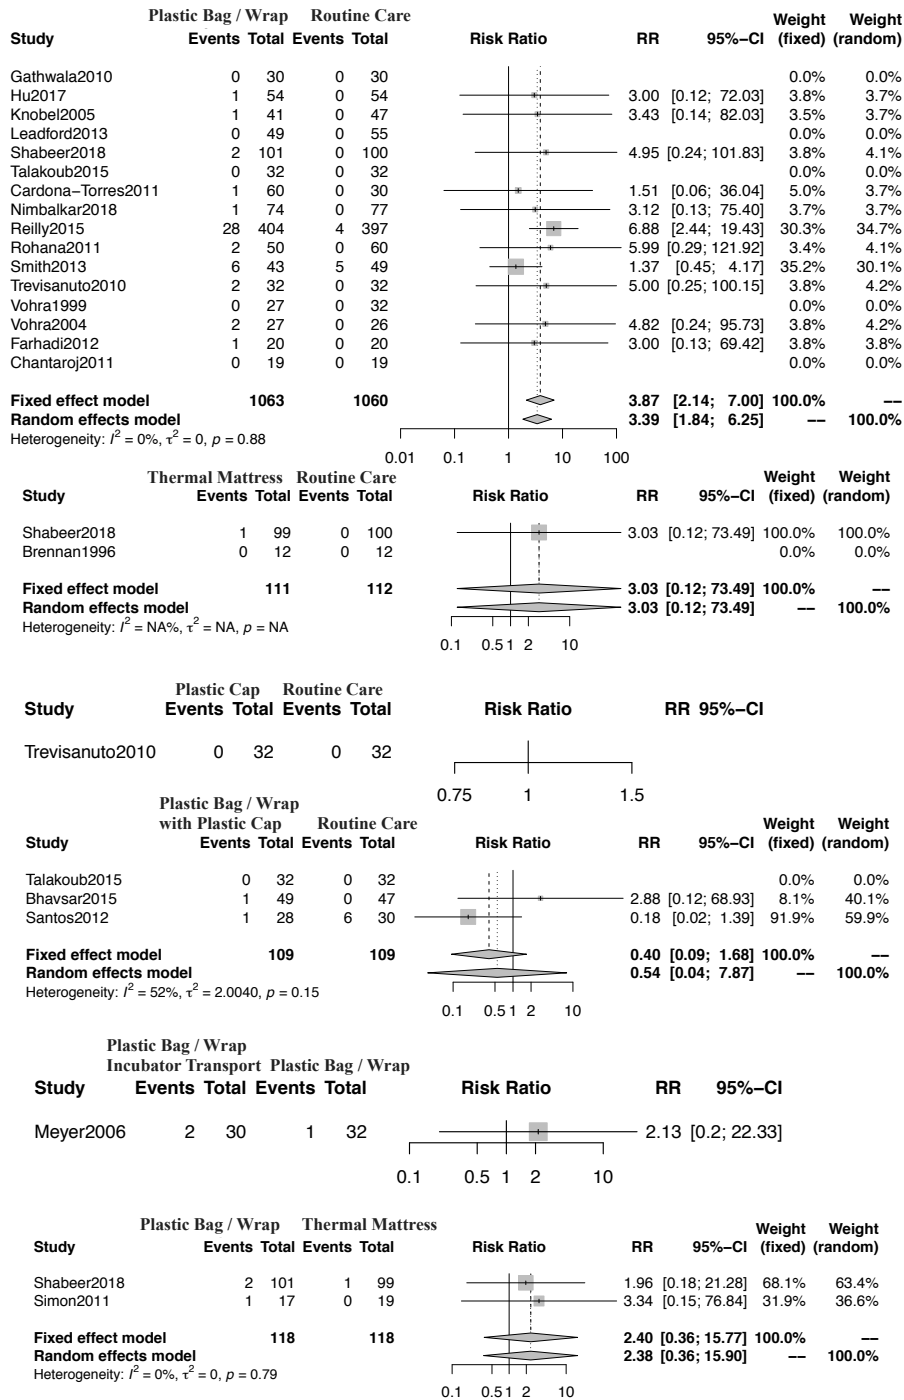

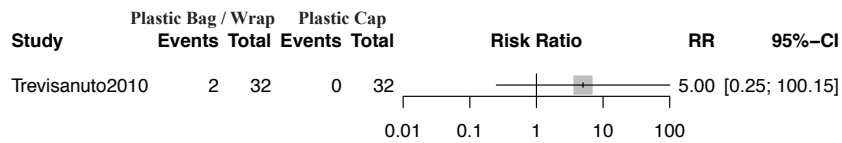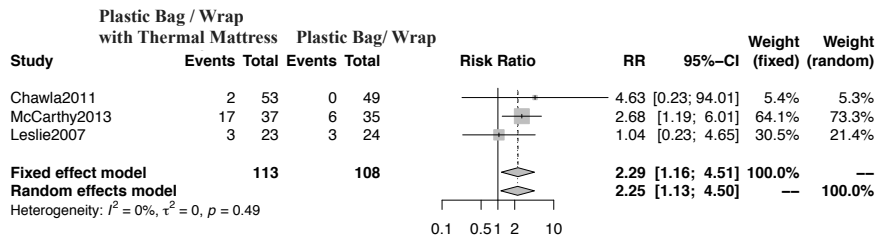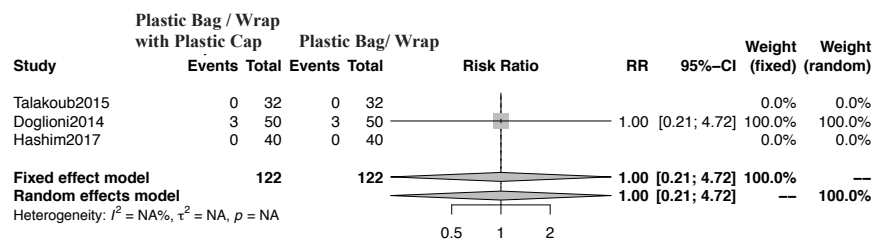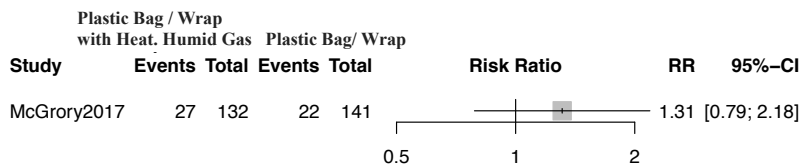

**Figure 31.** Major brain injury (MBI) defined as grade III-IV intraventricular hemorrhage or periventricular leukomalacia. A. Network plot; B. SUCRA plot; C. Forest plot depicting the network estimates [MD (95% CrI)] of the various interventions with “Routine Care” as the common comparator.

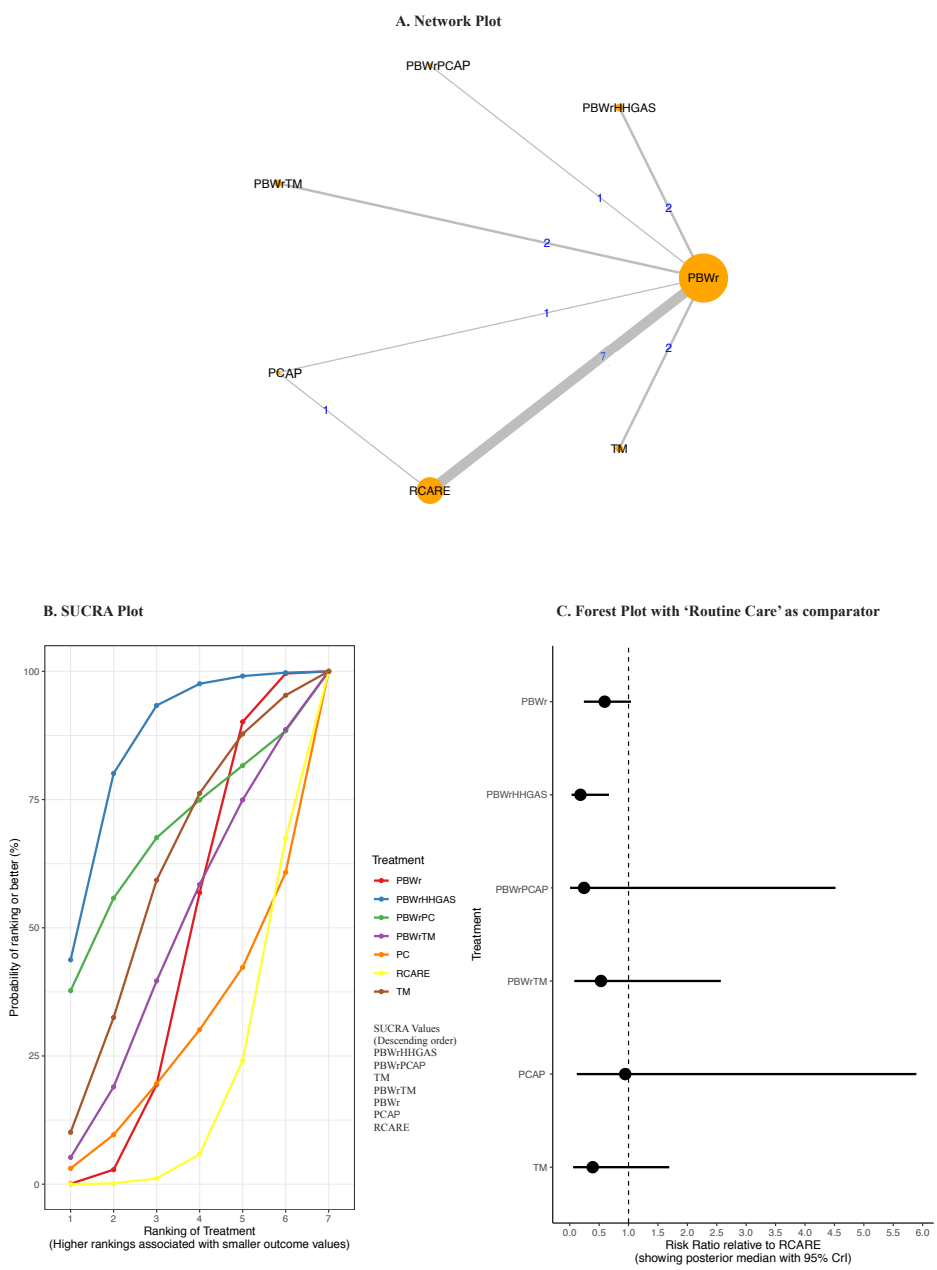

**eFigure 32-** League plot depicting the network estimate [RR (95% CrI)] for MBI [defined as grade III-IV intraventricular hemorrhage (IVH) or cystic periventricular leukomalacia (PVL)]

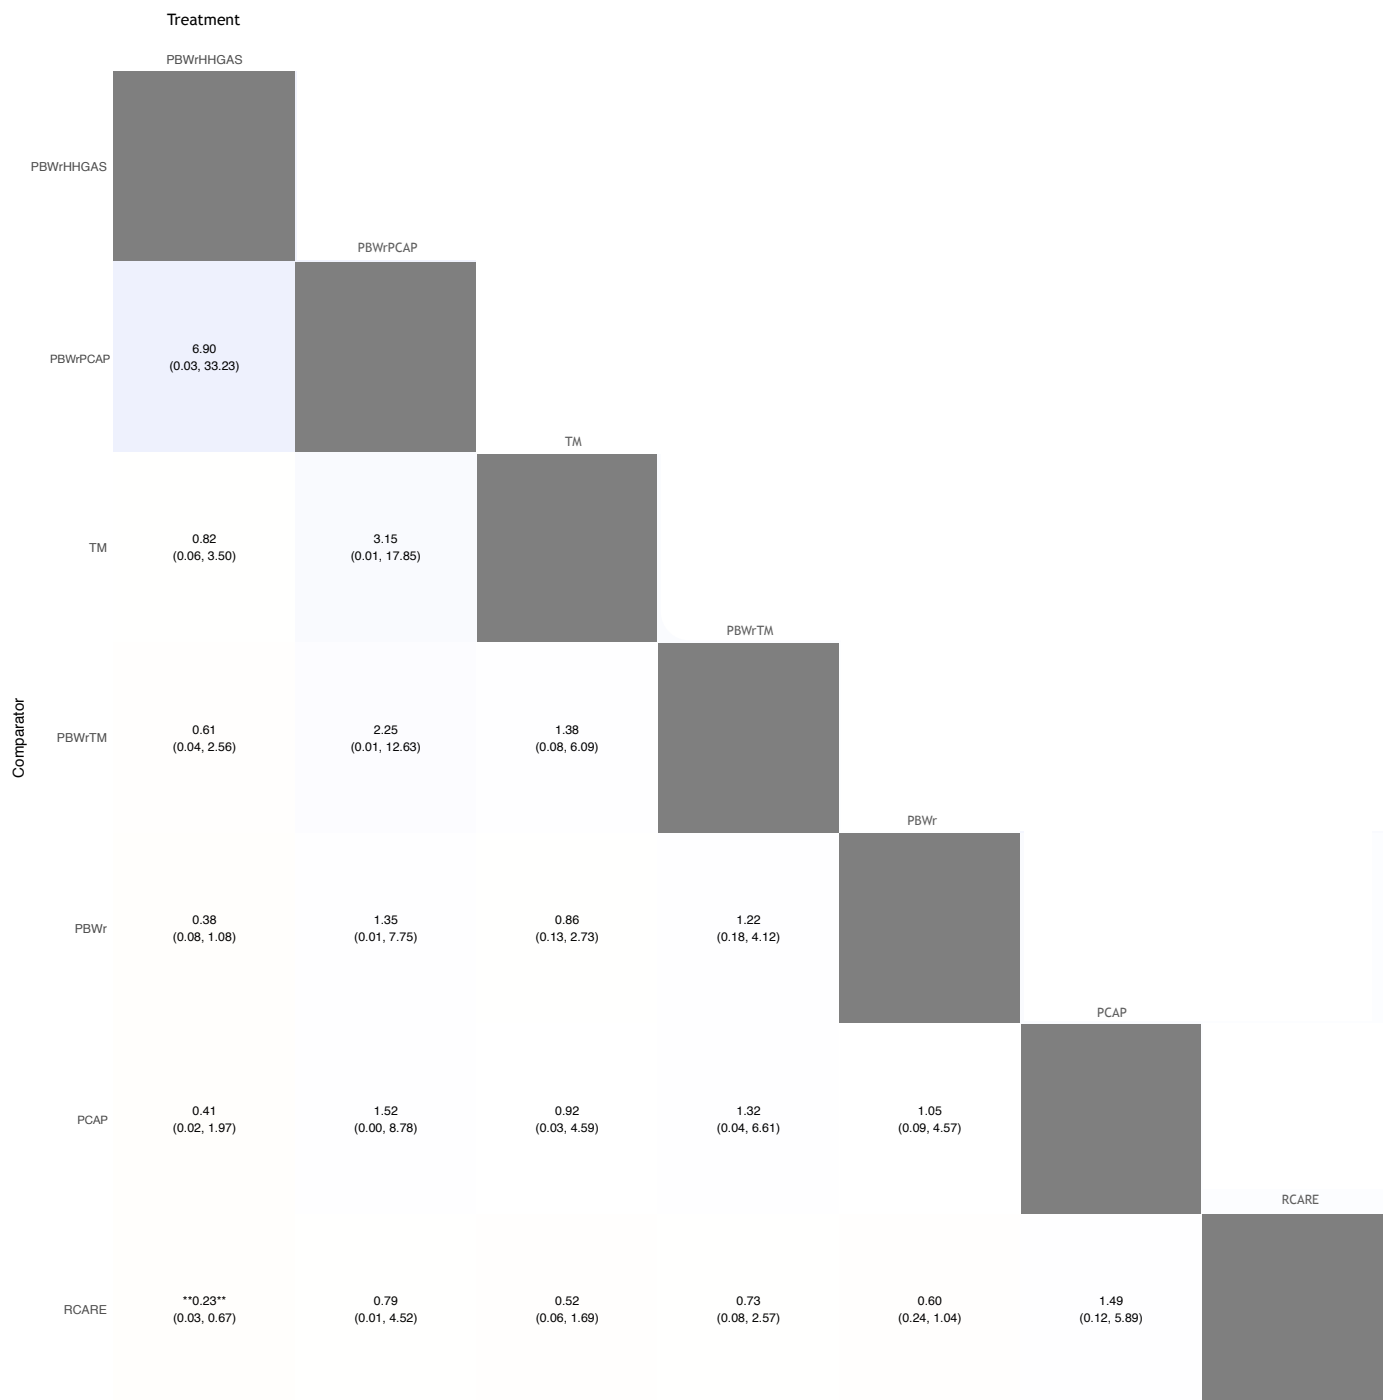

**eFigure 33.** Direct Evidence from the pair wise comparisons for MBI defined as grade III-IV intraventricular hemorrhage or periventricular leukomalacia

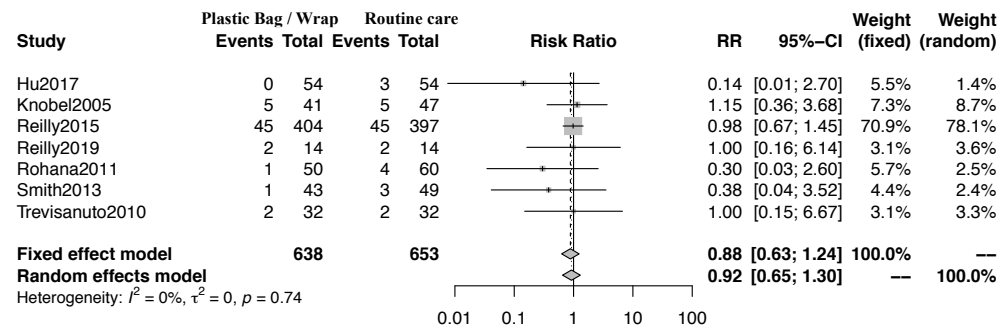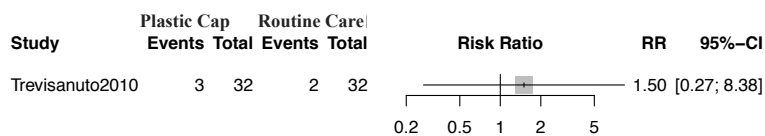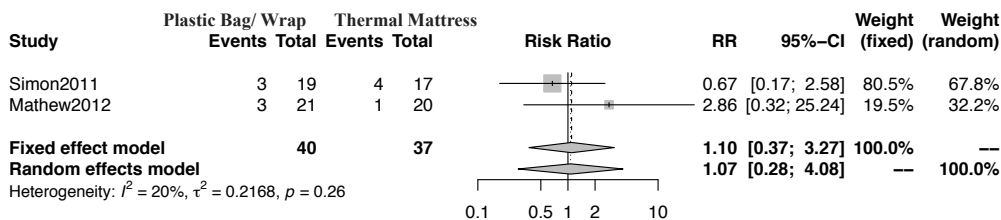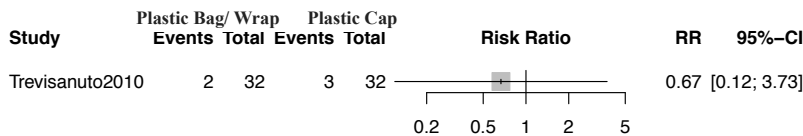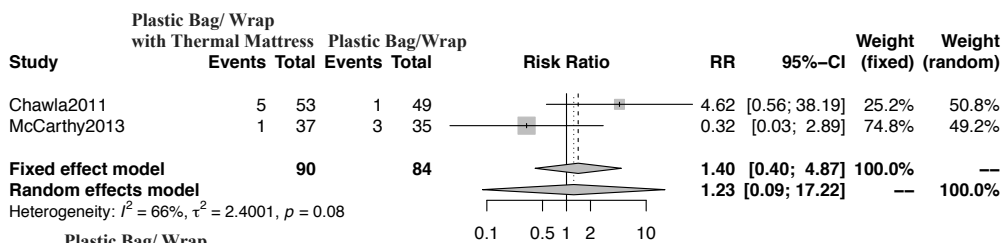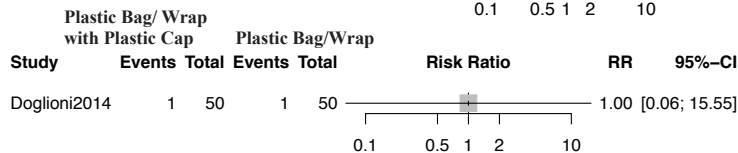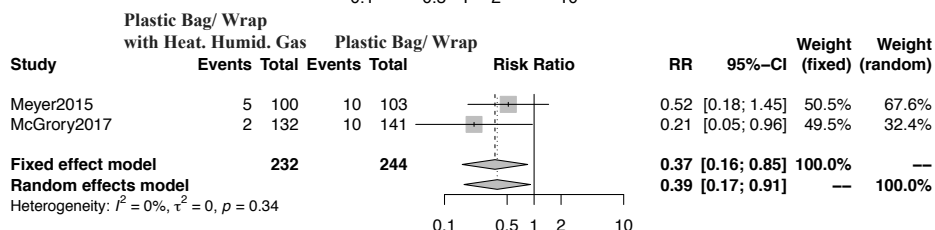



**eFigure 34.** Funnel plots and Trim-fill plots for pairwise comparisons - ‘PBWr’ versus ‘Routine Care’ for outcomes - Mean core body temperature, Mortality before discharge, Hyperthermia

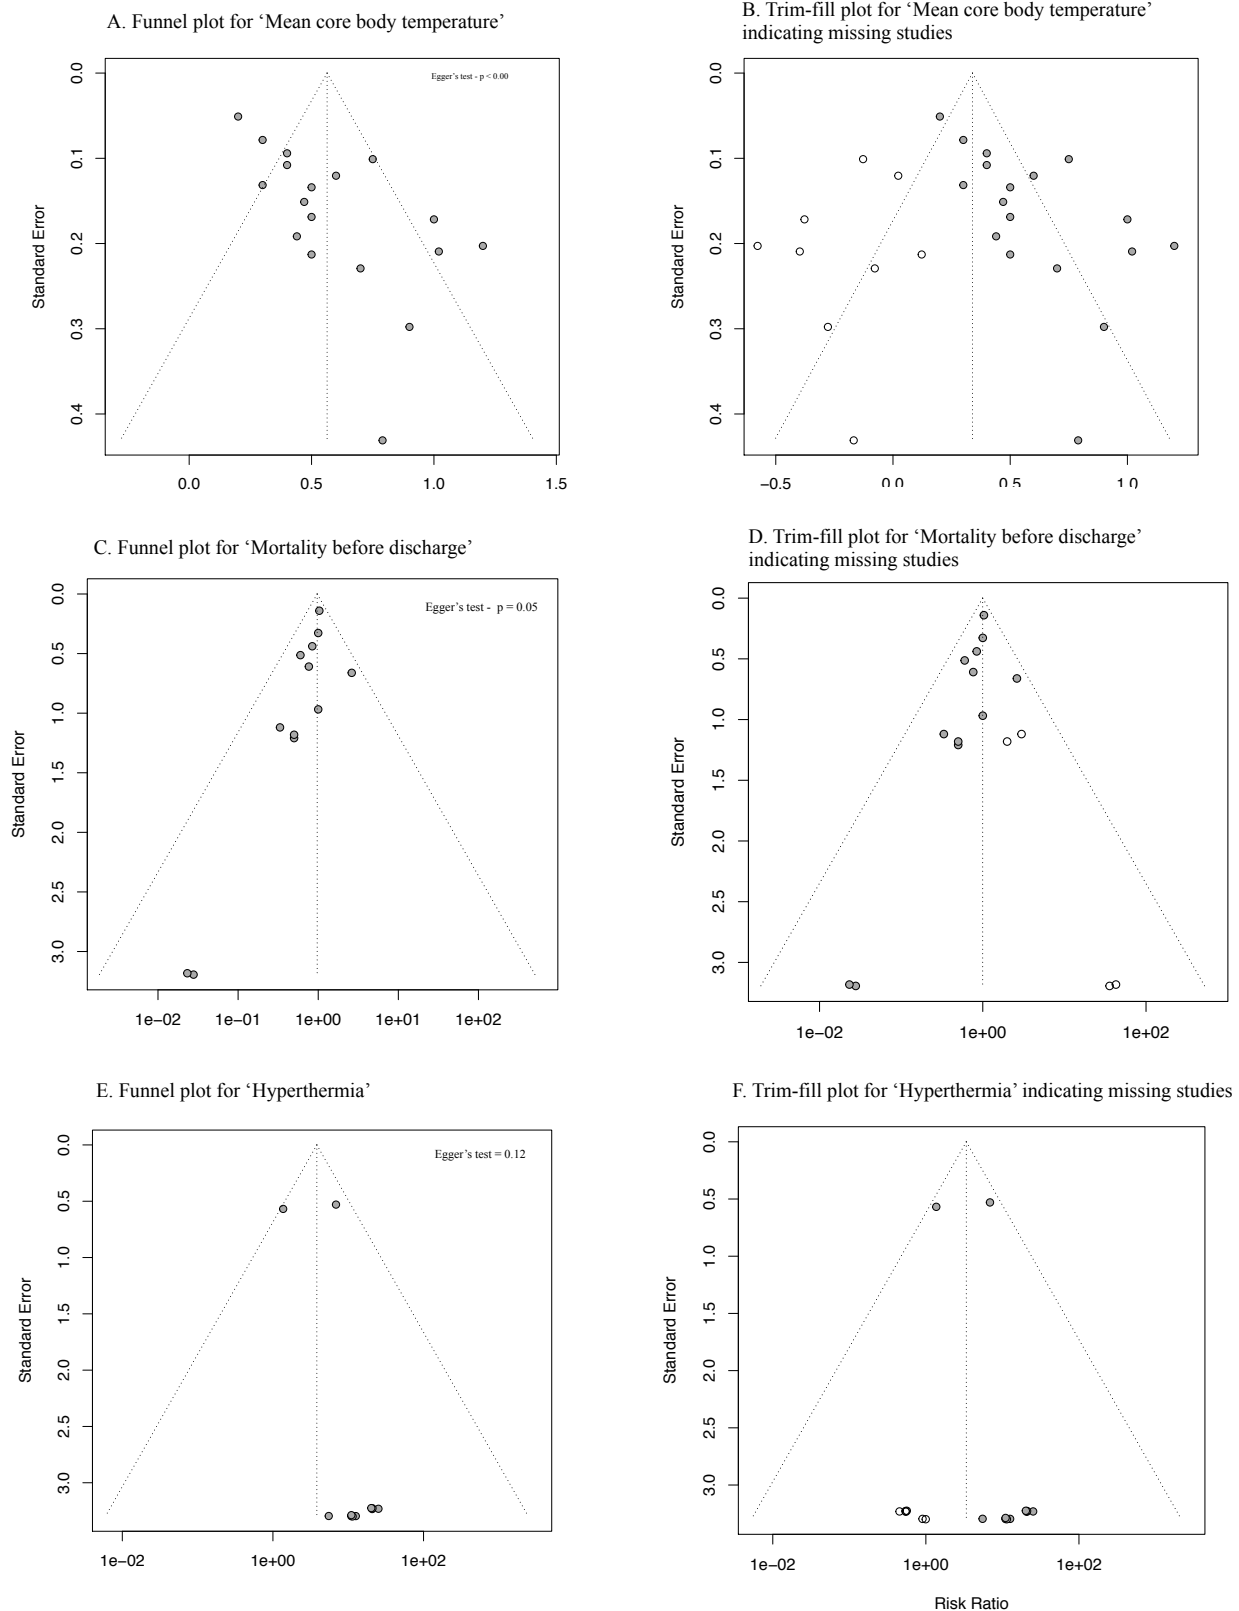

**eTable 1.** Literature search strategy

**MEDLINE**

---

|    |                                                                                                                                                                                                                                                                                  |         |
|----|----------------------------------------------------------------------------------------------------------------------------------------------------------------------------------------------------------------------------------------------------------------------------------|---------|
| 1  | Infant, Newborn                                                                                                                                                                                                                                                                  | 608986  |
| 2  | Infant, Premature                                                                                                                                                                                                                                                                | 54313   |
| 3  | Infant, Small for Gestational Age                                                                                                                                                                                                                                                | 7486    |
| 4  | Infant, Low Birth Weight                                                                                                                                                                                                                                                         | 18623   |
| 5  | Infant, Extremely Premature                                                                                                                                                                                                                                                      | 2637    |
| 6  | Infant, Very Low Birth Weight                                                                                                                                                                                                                                                    | 8584    |
| 7  | 1 or 2 or 3 or 4 or 5 or 6                                                                                                                                                                                                                                                       | 612617  |
| 8  | (Neonate* or Newborn* or Preterm* or term or premature or "Low birth weight" or lbw or vlbw or elbw or "Low birth weights" or "Low birthweight" or "Low birthweights" or Infant* or "pre-terms" or "Pre-term" or "Small gestational age" or SGA or "Extremely premature").ab,ti. | 1748517 |
| 9  | 7 or 8                                                                                                                                                                                                                                                                           | 2063299 |
| 10 | Hypothermia or hypotherm*.mp.                                                                                                                                                                                                                                                    | 52137   |
| 11 | therm*.mp. (505154)                                                                                                                                                                                                                                                              |         |
| 12 | Body Temperature Regulation or Temperature or Body Temperature or temperature*.mp.13 "heat loss".mp.                                                                                                                                                                             | 888877  |
| 14 | "cold stress".mp.                                                                                                                                                                                                                                                                | 3246    |
| 15 | 10 or 11 or 12 or 13 or 14                                                                                                                                                                                                                                                       | 4966    |
| 16 | 8 and 15                                                                                                                                                                                                                                                                         | 1221935 |
| 17 | limit 16 to clinical trial, all                                                                                                                                                                                                                                                  | 50805   |
|    |                                                                                                                                                                                                                                                                                  | 2059    |

---

## EMBASE

---

|    |                                                                                                                                                                                                                                                                                                 |         |
|----|-------------------------------------------------------------------------------------------------------------------------------------------------------------------------------------------------------------------------------------------------------------------------------------------------|---------|
| 1  | Infant, Newborn                                                                                                                                                                                                                                                                                 | 478706  |
| 2  | Infant, Premature                                                                                                                                                                                                                                                                               | 99411   |
| 3  | Infant, Small for Gestational Age                                                                                                                                                                                                                                                               | 14848   |
| 4  | Infant, Low Birth Weight                                                                                                                                                                                                                                                                        | 32783   |
| 5  | Infant, Extremely Premature                                                                                                                                                                                                                                                                     | 104449  |
| 6  | Infant, Very Low Birth Weight                                                                                                                                                                                                                                                                   | 12541   |
| 7  | 1 or 2 or 3 or 4 or 5 or 6                                                                                                                                                                                                                                                                      | 567365  |
| 8  | (Neonate* or Newborn* or Preterm* or term<br>or premature or "Low birth weight" or lbw or<br>vlbw or elbw or "Low birth weights" or<br>"Low birthweight" or "Low birthweights" or Infant*<br>or "pre-terms" or "Pre-term" or "Small gestational age"<br>or SGA or "Extremely premature").ab,ti. | 2281653 |
| 9  | 7 or 8                                                                                                                                                                                                                                                                                          | 2531580 |
| 10 | Hypothermia or hypotherm*.mp.                                                                                                                                                                                                                                                                   | 65308   |
| 11 | therm*.mp.                                                                                                                                                                                                                                                                                      | 573385  |
| 12 | Body Temperature Regulation or Temperature<br>or Body Temperature or temperature*.mp.                                                                                                                                                                                                           | 846692  |
| 13 | "heat loss".mp.                                                                                                                                                                                                                                                                                 | 4973    |
| 14 | "cold stress".mp.                                                                                                                                                                                                                                                                               | 18049   |
| 15 | 10 or 11 or 12 or 13 or 14                                                                                                                                                                                                                                                                      | 1267043 |
| 16 | 8 and 15                                                                                                                                                                                                                                                                                        | 64537   |
| 17 | limit 16 to clinical trial                                                                                                                                                                                                                                                                      | 1952    |

---

## CENTRAL

---

| ID  |                                                                                                                                                                                                                                                                                                                         | Search Hits |
|-----|-------------------------------------------------------------------------------------------------------------------------------------------------------------------------------------------------------------------------------------------------------------------------------------------------------------------------|-------------|
| #1  | MeSH descriptor: [Infant, Newborn] explode all trees                                                                                                                                                                                                                                                                    | 15916       |
| #2  | (Neonate* or Newborn* or Preterm* or term or premature or "Low birth weight" or lbw or vlbw or elbw or "Low birth weights" or "Low birthweight" or "Low birthweights" or Infant* or "pre-terms" or "Pre-term" or "Small gestational age" or SGA or "Extremely premature"):ti,ab,kw (Word variations have been searched) | 269690      |
| #3  | #1 or #2                                                                                                                                                                                                                                                                                                                | 269690      |
| #4  | MeSH descriptor: [Hypothermia] explode all trees                                                                                                                                                                                                                                                                        | 704         |
| #5  | MeSH descriptor: [Temperature] explode all trees                                                                                                                                                                                                                                                                        | 4400        |
| #6  | MeSH descriptor: [Body Temperature] explode all trees                                                                                                                                                                                                                                                                   | 4036        |
| #7  | MeSH descriptor: [Cold-Shock Response] explode all trees                                                                                                                                                                                                                                                                | 6           |
| #8  | (hypotherm* OR therm* OR temperatur* OR "Cold stress" OR "cold-stress" or "heat loss")<br>(Word variations have been searched)                                                                                                                                                                                          | 32823       |
| #9  | {OR #4-#8}                                                                                                                                                                                                                                                                                                              | 33224       |
| #10 | #3 AND #9                                                                                                                                                                                                                                                                                                               | 6620        |
| #11 | Medline and Embase hits removed                                                                                                                                                                                                                                                                                         | 1738        |

---

## CINAHL

---

| #   | Query                                                                                                                                                                                                                                                                                                                                                                                                                                                                                                                                                                | Results  |
|-----|----------------------------------------------------------------------------------------------------------------------------------------------------------------------------------------------------------------------------------------------------------------------------------------------------------------------------------------------------------------------------------------------------------------------------------------------------------------------------------------------------------------------------------------------------------------------|----------|
| S10 | S3 AND S8                                                                                                                                                                                                                                                                                                                                                                                                                                                                                                                                                            | 405      |
| S9  | S3 AND S8                                                                                                                                                                                                                                                                                                                                                                                                                                                                                                                                                            | 11,567   |
| S8  | S4 OR S5 OR S6 OR S7                                                                                                                                                                                                                                                                                                                                                                                                                                                                                                                                                 | 73,053   |
| S7  | TI ( (hypotherm* OR therm* OR temperatur* OR "Cold stress" OR "cold-stress" or "heat loss") ) OR AB ( (hypotherm* OR therm* OR temperatur* OR "Cold stress" OR "cold-stress" or "heat loss") )                                                                                                                                                                                                                                                                                                                                                                       | 47,413   |
| S6  | (MH "Heat Loss+")                                                                                                                                                                                                                                                                                                                                                                                                                                                                                                                                                    | 3,789    |
| S5  | (MH "Temperature+") OR (MH "Altered Body Temperature (NANDA)+") OR (MH "Body Temperature+") OR (MH "Body Temperature Changes+") OR (MH "Body Temperature Regulation+")                                                                                                                                                                                                                                                                                                                                                                                               | 41,315   |
| S4  | (MH "Hypothermia") OR (MH "Hypothermia, Induced")                                                                                                                                                                                                                                                                                                                                                                                                                                                                                                                    | 7,814    |
| S3  | S1 OR S2                                                                                                                                                                                                                                                                                                                                                                                                                                                                                                                                                             | 6,66,358 |
| S2  | TI ( (Neonate* or Newborn* or Preterm* or term or premature or "Low birth weight" or lbw or vlbw or elbw or "Low birth weights" or "Low birthweight" or "Low birthweights" or Infant* or "pre-terms" or "Pre-term" or "Small gestational age" or SGA or "Extremely premature") ) OR AB ( (Neonate* or Newborn* or Preterm* or term or premature or "Low birth weight" or lbw or vlbw or elbw or "Low birth weights" or "Low birthweight" or "Low birthweights" or Infant* or "pre-terms" or "Pre-term" or "Small gestational age" or SGA or "Extremely premature") ) | 5,03,272 |
| S1  | (MH "Infant+") OR (MH "Infant, Premature") OR (MH "Infant, Postmature") OR (MH "Infant, High Risk") OR (MH "Infant, Very Low Birth Weight") OR (MH "Infant, Small for Gestational Age") OR (MH "Infant, Large for Gestational Age") OR (MH "Infant, Newborn, Diseases+")                                                                                                                                                                                                                                                                                             | 2,73,119 |

**eTable 2.** Some of the studies that were excluded for valid reasons<sup>35-44</sup>

| <b>Study</b>        | <b>Reason for exclusion</b>                                                                                                                                                                                                                                                                  |
|---------------------|----------------------------------------------------------------------------------------------------------------------------------------------------------------------------------------------------------------------------------------------------------------------------------------------|
| Agarwal 2001        | This RCT evaluated ‘paper sandwiched between blankets’ versus ‘blankets’ alone was excluded as participants included term neonates and median birth weight of the study population was 2800-2900 g.                                                                                          |
| Baum 1968           | The study evaluating silver foil wrap was conducted in 1968 when care practices and survival of preterm neonates were not comparable to recent years. Also, term neonates were included in the study.                                                                                        |
| Castro 2007         | This study comparing plastic bag versus routine care was excluded as it was a prospective descriptive study                                                                                                                                                                                  |
| Duman 2006          | This study evaluating plastic wrap versus routine care in VLBW neonates was excluded as it was not a RCT                                                                                                                                                                                     |
| Jia 2013            | This study evaluating the effect of two different delivery room temperatures in preterm infants was excluded as one of the interventions was delivery room temperature of 20-23oC, which is lower than the standard delivery room temperature prescribed by ILCOR as a part of routine care. |
| Linner 2019         | This study evaluating the effect of skin-to-skin care in preterm infants was excluded since it included infants with birth weight up to 2800 g                                                                                                                                               |
| Meyer 2001          | This study evaluating radiant warmer versus incubator for preterm neonates was excluded as the intervention was applied on NICU admission and not in the delivery room                                                                                                                       |
| Nuntnarumit 2004    | Study was published in abstract form and full text was not available                                                                                                                                                                                                                         |
| Punnahitananda 2008 | Methodological quality could not be assessed and outcome data not available                                                                                                                                                                                                                  |
| Roberts 1981        | The study evaluating stockinette cap was conducted in 1981 when care practices and survival of preterm neonates were not comparable.                                                                                                                                                         |

**eTable 3.** Network characteristics for all the outcomes and sensitivity analysis

| <b>Primary outcome - Mean core body temperature (axillary or rectal) at admission or within first 2 hours of life</b>                                                                                                   |                          |                           |   |   |
|-------------------------------------------------------------------------------------------------------------------------------------------------------------------------------------------------------------------------|--------------------------|---------------------------|---|---|
| <b>Comparison</b>                                                                                                                                                                                                       | <b>Number of studies</b> | <b>Number of subjects</b> |   |   |
| INCUPBWr vs. PBWr                                                                                                                                                                                                       | 1                        | 62                        | - | - |
| PBWr vs. PBWrHHGAS                                                                                                                                                                                                      | 2                        | 476                       | - | - |
| PBWr vs. PBWrPCAP                                                                                                                                                                                                       | 3                        | 244                       | - | - |
| PBWr vs. PBWrTM                                                                                                                                                                                                         | 3                        | 221                       | - | - |
| PBWr vs. PCAP                                                                                                                                                                                                           | 1                        | 64                        | - | - |
| PBWr vs. RCARE                                                                                                                                                                                                          | 18                       | 2171                      | - | - |
| PBWr vs. TM                                                                                                                                                                                                             | 3                        | 277                       | - | - |
| PBWrPC vs. RCARE                                                                                                                                                                                                        | 3                        | 218                       | - | - |
| PCAP vs. RCARE                                                                                                                                                                                                          | 1                        | 64                        | - | - |
| RCARE vs. TM                                                                                                                                                                                                            | 3                        | 263                       | - | - |
| <b>Sensitivity analysis by evaluating plastic bag and plastic wrap as separate interventions for the primary outcome : Mean core body temperature (axillary or rectal) at admission or within first 2 hours of life</b> |                          |                           |   |   |
| <b>Comparison</b>                                                                                                                                                                                                       | <b>Number of studies</b> | <b>Number of subjects</b> |   |   |
| INCUPWRAP vs. PWRAP                                                                                                                                                                                                     | 1                        | 62                        | - | - |
| PBAG vs. PBAGHHGAS                                                                                                                                                                                                      | 1                        | 273                       | - | - |
| PBAG vs. PBAGPCAP                                                                                                                                                                                                       | 1                        | 64                        | - | - |
| PBAG vs. PBAGTM                                                                                                                                                                                                         | 3                        | 221                       | - | - |
| PBAG vs. PCAP                                                                                                                                                                                                           | 1                        | 64                        | - | - |
| PBAG vs. PWRAP                                                                                                                                                                                                          | 1                        | 59                        | - | - |
| PBAG vs. RCARE                                                                                                                                                                                                          | 11                       | 968                       | - | - |
| PBAG vs. TM                                                                                                                                                                                                             | 2                        | 241                       | - | - |
| PBAGPCAP vs. PWRAP                                                                                                                                                                                                      | 1                        | 100                       | - | - |
| PBAGPCAP vs. RCARE                                                                                                                                                                                                      | 1                        | 64                        | - | - |
| PCAP vs. RCARE                                                                                                                                                                                                          | 1                        | 64                        | - | - |
| PWRAP vs. PWRAPHHGAS                                                                                                                                                                                                    | 1                        | 203                       | - | - |
| PWRAP vs. PWRAPPCAP                                                                                                                                                                                                     | 1                        | 80                        | - | - |

| PWRAP vs. RCARE                                                                                                                                                                                                                                                   | 7                        | 1233                      | - | - |
|-------------------------------------------------------------------------------------------------------------------------------------------------------------------------------------------------------------------------------------------------------------------|--------------------------|---------------------------|---|---|
| PWRAP vs. TM                                                                                                                                                                                                                                                      | 1                        | 36                        | - | - |
| PWRAPPCAP vs. RCARE                                                                                                                                                                                                                                               | 2                        | 154                       | - | - |
| RCARE vs. TM                                                                                                                                                                                                                                                      | 3                        | 263                       | - | - |
| <b>Sensitivity analysis by evaluating studies in which the mean gestational age of the included neonates was <math>\leq 30</math> weeks for the primary outcome: Mean core body temperature (axillary or rectal) at admission or within first 2 hours of life</b> |                          |                           |   |   |
| <b>Comparison</b>                                                                                                                                                                                                                                                 | <b>Number of studies</b> | <b>Number of subjects</b> |   |   |
| INCUPBWr vs. PBWr                                                                                                                                                                                                                                                 | 1                        | 62                        | - | - |
| PBWr vs. PBWrHHGAS                                                                                                                                                                                                                                                | 2                        | 476                       | - | - |
| PBWr vs. PBWrPCAP                                                                                                                                                                                                                                                 | 1                        | 100                       | - | - |
| PBWr vs. PBWrTM                                                                                                                                                                                                                                                   | 3                        | 221                       | - | - |
| PBWr vs. PCAP                                                                                                                                                                                                                                                     | 1                        | 64                        | - | - |
| PBWr vs. RCARE                                                                                                                                                                                                                                                    | 13                       | 1591                      | - | - |
| PBWr vs. TM                                                                                                                                                                                                                                                       | 2                        | 77                        | - | - |
| PCAP vs. RCARE                                                                                                                                                                                                                                                    | 1                        | 64                        | - | - |
| RCARE vs. TM                                                                                                                                                                                                                                                      | 1                        | 24                        | - | - |
| <b>Sensitivity analysis by evaluating drying versus no drying before wrapping in a plastic bag / wrap for the primary outcome: Mean core body temperature (axillary or rectal) at admission or within first 2 hours of life</b>                                   |                          |                           |   |   |
| <b>Comparison</b>                                                                                                                                                                                                                                                 | <b>Number of studies</b> | <b>Number of subjects</b> |   |   |
| INCUPBWrW vs. PBWrW                                                                                                                                                                                                                                               | 1                        | 62                        | - | - |
| PBWrD vs. PBWrW                                                                                                                                                                                                                                                   | 1                        | 60                        | - | - |
| PBWrD vs. RCARE                                                                                                                                                                                                                                                   | 4                        | 332                       | - | - |
| PBWrHHGASW vs. PBWrW                                                                                                                                                                                                                                              | 2                        | 476                       | - | - |
| PBWrPCAPD vs. RCARE                                                                                                                                                                                                                                               | 2                        | 154                       | - | - |
| PBWrPCAPW vs. PBWrW                                                                                                                                                                                                                                               | 3                        | 244                       | - | - |
| PBWrPCAPW vs. RCARE                                                                                                                                                                                                                                               | 1                        | 64                        | - | - |
| PBWrTMW vs. PBWrW                                                                                                                                                                                                                                                 | 3                        | 221                       | - | - |
| PBWrW vs. PCAP                                                                                                                                                                                                                                                    | 1                        | 64                        | - | - |
| PBWrW vs. RCARE                                                                                                                                                                                                                                                   | 15                       | 1899                      | - | - |
| PBWrW vs. TM                                                                                                                                                                                                                                                      | 3                        | 277                       | - | - |



| PCAP vs. RCARE                                                                                                                                                                                  | 1                        | 64                        | -                         | -                     |
|-------------------------------------------------------------------------------------------------------------------------------------------------------------------------------------------------|--------------------------|---------------------------|---------------------------|-----------------------|
| RCARE vs. TM                                                                                                                                                                                    | 3                        | 263                       | -                         | -                     |
| <b>Primary outcome - Moderate or severe hypothermia [defined as core body temperature (axillary or rectal temperature) less than 36 degree Celsius] at admission or within 2 hours of life.</b> |                          |                           |                           |                       |
| <b>Comparison</b>                                                                                                                                                                               | <b>Number of studies</b> | <b>Number of subjects</b> | <b>Number of outcomes</b> | <b>Event rate (%)</b> |
| INCUPBWr vs. PBWr                                                                                                                                                                               | 1                        | 62                        | 9                         | 14.5                  |
| PBWr vs. PBWrHHGAS                                                                                                                                                                              | 2                        | 476                       | 57                        | 12                    |
| PBWr vs. PBWrPCAP                                                                                                                                                                               | 2                        | 180                       | 68                        | 37.8                  |
| PBWr vs. PBWrTM                                                                                                                                                                                 | 1                        | 102                       | 46                        | 8.8                   |
| PBWr vs. RCARE                                                                                                                                                                                  | 5                        | 1270                      | 156                       | 12.3                  |
| PBWr vs. TM                                                                                                                                                                                     | 1                        | 200                       | 0                         | 0                     |
| PBWrPCAP vs. RCARE                                                                                                                                                                              | 1                        | 96                        | 36                        | 37.5                  |
| RCARE vs. SSC                                                                                                                                                                                   | 1                        | 31                        | 9                         | 29                    |
| RCARE vs. TM                                                                                                                                                                                    | 2                        | 223                       | 12                        | 5.4                   |
| <b>Sensitivity analysis - Any hypothermia (defined as core body temperature less than 36.5 degree Celsius at admission or within 1-2 hours of life)</b>                                         |                          |                           |                           |                       |
| <b>Comparison</b>                                                                                                                                                                               | <b>Number of studies</b> | <b>Number of subjects</b> | <b>Number of outcomes</b> | <b>Event rate (%)</b> |
| INCUPBWr vs. PBWr                                                                                                                                                                               | 1                        | 62                        | 17                        | 27.4                  |
| PBWr vs. PBWrHHGAS                                                                                                                                                                              | 2                        | 476                       | 111                       | 23.3                  |
| PBWr vs. PBWrPCAP                                                                                                                                                                               | 2                        | 180                       | 120                       | 66.7                  |
| PBWr vs. PBWrTM                                                                                                                                                                                 | 3                        | 221                       | 69                        | 31.2                  |
| PBWr vs. PCAP                                                                                                                                                                                   | 1                        | 64                        | 34                        | 53.1                  |
| PBWr vs. RCARE                                                                                                                                                                                  | 14                       | 1957                      | 1191                      | 60.8                  |
| PBWr vs. TM                                                                                                                                                                                     | 2                        | 236                       | 125                       | 53                    |
| PBWrPCAP vs. RCARE                                                                                                                                                                              | 1                        | 96                        | 36                        | 37.5                  |
| PCAP vs. RCARE                                                                                                                                                                                  | 1                        | 64                        | 43                        | 67.2                  |
| RCARE vs. SSC                                                                                                                                                                                   | 1                        | 31                        | 9                         | 29                    |
| RCARE vs. TM                                                                                                                                                                                    | 2                        | 223                       | 142                       | 63.7                  |
| <b>Hyperthermia [defined as core body temperature (axillary or rectal) more than 37.5 degree Celsius] at admission or within 2 hours of life.</b>                                               |                          |                           |                           |                       |
| <b>Comparison</b>                                                                                                                                                                               | <b>Number of studies</b> | <b>Number of subjects</b> | <b>Number of outcomes</b> | <b>Event rate (%)</b> |

| INCUPBWr vs. PBWr                                                                                                   | 1                        | 62                        | 3                         | 4.8                   |
|---------------------------------------------------------------------------------------------------------------------|--------------------------|---------------------------|---------------------------|-----------------------|
| PBWr vs. PBWrHHGAS                                                                                                  | 1                        | 273                       | 49                        | 17.9                  |
| PBWr vs. PBWrPCAP                                                                                                   | 3                        | 244                       | 6                         | 2.4                   |
| PBWr vs. PBWrTM                                                                                                     | 3                        | 221                       | 31                        | 14                    |
| PBWr vs. PCAP                                                                                                       | 1                        | 64                        | 2                         | 3.1                   |
| PBWr vs. RCARE                                                                                                      | 16                       | 2123                      | 56                        | 2.6                   |
| PBWr vs. TM                                                                                                         | 2                        | 236                       | 4                         | 1.7                   |
| PBWrPCAP vs. RCARE                                                                                                  | 3                        | 218                       | 8                         | 3.7                   |
| PCAP vs. RCARE                                                                                                      | 1                        | 64                        | 0                         | 0                     |
| RCARE vs. TM                                                                                                        | 2                        | 223                       | 1                         | 0                     |
| <b>Mortality before discharge</b>                                                                                   |                          |                           |                           |                       |
| <b>Comparison</b>                                                                                                   | <b>Number of studies</b> | <b>Number of subjects</b> | <b>Number of outcomes</b> | <b>Event rate( %)</b> |
| PBWr vs. PBWrHHGAS                                                                                                  | 2                        | 476                       | 40                        | 8.4                   |
| PBWr vs. PBWrPCAP                                                                                                   | 2                        | 180                       | 9                         | 5                     |
| PBWr vs. PBWrTM                                                                                                     | 3                        | 221                       | 20                        | 9                     |
| PBWr vs. PCAP                                                                                                       | 1                        | 64                        | 5                         | 7.8                   |
| PBWr vs. RCARE                                                                                                      | 14                       | 1836                      | 259                       | 14.1                  |
| PBWr vs. TM                                                                                                         | 3                        | 277                       | 10                        | 3.6                   |
| PCAP vs. RCARE                                                                                                      | 1                        | 64                        | 5                         | 7.8                   |
| RCARE vs. TM                                                                                                        | 1                        | 199                       | 0                         | 0                     |
| <b>MBI [defined as grade III-IV intraventricular hemorrhage (IVH) or cystic periventricular leukomalacia (PVL)]</b> |                          |                           |                           |                       |
| <b>Comparison</b>                                                                                                   | <b>Number of studies</b> | <b>Number of subjects</b> | <b>Number of outcomes</b> | <b>Event rate (%)</b> |
| PBWr vs. PBWrHHGAS                                                                                                  | 2                        | 476                       | 27                        | 5.7                   |
| PBWr vs. PBWrPCAP                                                                                                   | 1                        | 100                       | 2                         | 2                     |
| PBWr vs. PBWrTM                                                                                                     | 2                        | 174                       | 10                        | 5.7                   |
| PBWr vs. PCAP                                                                                                       | 1                        | 64                        | 5                         | 7.8                   |
| PBWr vs. RCARE                                                                                                      | 7                        | 1291                      | 120                       | 9.3                   |
| PBWr vs. TM                                                                                                         | 2                        | 77                        | 11                        | 14.3                  |
| PCAP vs. RCARE                                                                                                      | 1                        | 64                        | 5                         | 7.8                   |

**eTable 4.** Certainty of evidence for different comparisons for the sensitivity analyses and secondary outcomes

| <b>Sensitivity analysis on body temperature - Plastic bag and plastic wrap as separate interventions</b>                                                                                                                                                                                                                                                                                                                                                                                                                                                                                                                      |                              |                              |                                           |                              |
|-------------------------------------------------------------------------------------------------------------------------------------------------------------------------------------------------------------------------------------------------------------------------------------------------------------------------------------------------------------------------------------------------------------------------------------------------------------------------------------------------------------------------------------------------------------------------------------------------------------------------------|------------------------------|------------------------------|-------------------------------------------|------------------------------|
|                                                                                                                                                                                                                                                                                                                                                                                                                                                                                                                                                                                                                               | <b>Indirect Evidence</b>     | <b>Direct Evidence</b>       | <b>Network Meta-analysis</b>              |                              |
| <b>Comparison</b>                                                                                                                                                                                                                                                                                                                                                                                                                                                                                                                                                                                                             | <b>Certainty of evidence</b> | <b>Certainty of evidence</b> | <b>Risk Ratio (95% Credible Interval)</b> | <b>Certainty of evidence</b> |
| PBAG: PWRAP                                                                                                                                                                                                                                                                                                                                                                                                                                                                                                                                                                                                                   | LOW <sup>2,3,*,#</sup>       | MODERATE <sup>1</sup>        | 0.06 (-0.19, 0.30)                        | MODERATE                     |
| <p><sup>1</sup>Downgraded by one level for serious imprecision due to small sample size<br/> <sup>2</sup>Downgraded by one level for risk of bias, as the studies with high or unclear risk of selection bias constitute 47.8% weightage to the effect estimate in PWRAP:RCARE (Cardona-Torres 2011 and Santos 2012)<br/> <sup>3</sup>Downgraded for publication bias in PBAG:RCARE (Egger test, p value 0.01)<br/> *Not downgraded for downgraded for inconsistency, since the heterogeneity is due to differences between small and large beneficial effects.<br/> #From first-order loop of PBAG:RCARE and PWRAP:RCARE</p> |                              |                              |                                           |                              |
| <b>Sensitivity analysis on body temperature - Drying versus no drying before applying PBWr</b>                                                                                                                                                                                                                                                                                                                                                                                                                                                                                                                                |                              |                              |                                           |                              |
|                                                                                                                                                                                                                                                                                                                                                                                                                                                                                                                                                                                                                               | <b>Indirect Evidence</b>     | <b>Direct Evidence</b>       | <b>Network Meta-analysis</b>              |                              |
| <b>Comparison</b>                                                                                                                                                                                                                                                                                                                                                                                                                                                                                                                                                                                                             | <b>Certainty of evidence</b> | <b>Certainty of evidence</b> | <b>Risk Ratio (95% Credible Interval)</b> | <b>Certainty of evidence</b> |
| PBWrD:PBWrW                                                                                                                                                                                                                                                                                                                                                                                                                                                                                                                                                                                                                   | MODERATE <sup>3,*,#</sup>    | VERY LOW <sup>1, 2</sup>     | -0.09 (-0.38, 0.19)                       | MODERATE                     |
| PBWrPCAPD: PBWrPCAPW                                                                                                                                                                                                                                                                                                                                                                                                                                                                                                                                                                                                          | VERY LOW <sup>5,6,\$</sup>   | -                            | -0.37 (-0.90, 0.15)                       | VERY LOW                     |

<sup>1</sup>Downgraded by one level for serious risk of bias due to unclear selection bias in the included study (Cardona-Torres 2011)

<sup>2</sup>Downgraded by two levels for very serious imprecision due to small sample size and confidence interval including ‘no difference’.

<sup>3</sup>Downgraded for publication bias (Egger test, p value <0.001)

\*Not downgraded for serious risk of bias since the studies with high or unclear risk of bias constitute only 20% weightage to the effect estimate (Ahmed 2013, Cardona-Torres 2011, Chantaroj 2012, Farhadi 2012, Talakoub 2015)

<sup>4</sup>Downgraded by one level for serious risk of bias due to high risk of selection bias in one study that constitute 55.7% weightage to the effect estimate (Santos 2012)

<sup>5</sup>Downgraded by two levels for very serious imprecision due to confidence interval including ‘no difference’

#From first-order loop of PBWrW:RCARE and PBWrD:RCARE

§From first-order loop of PBWrPCAPD:RCARE and PBWrPCAPW:RCARE

**Secondary outcome - Hyperthermia [defined as core body temperature (axillary or rectal) more than 37.5 degree Celsius] at admission or within 2 hours of life.**

| Comparison        | Indirect Evidence       | Direct Evidence         | Network Meta-analysis              |                       |
|-------------------|-------------------------|-------------------------|------------------------------------|-----------------------|
|                   | Certainty of evidence   | Certainty of evidence   | Risk Ratio (95% Credible Interval) | Certainty of evidence |
| PCAP:PBWrPCAP     | VERY LOW <sup>1,3</sup> | -                       | <b>0.13 (0.00, 0.79)</b>           | VERY LOW              |
| PCAP:TM           | LOW <sup>1</sup>        | -                       | <b>0.12 (0.00, 0.54)</b>           | LOW                   |
| PCAP:RCARE        | LOW <sup>1</sup>        | LOW <sup>1</sup>        | <b>0.03 (0.00, 0.26)</b>           | LOW                   |
| PCAP:PBWr         | LOW <sup>1</sup>        | LOW <sup>1</sup>        | <b>0.03 (0.00, 0.22)</b>           | LOW                   |
| PCAP:PBWrHHGAS    | LOW <sup>1</sup>        | -                       | <b>0.04 (0.00, 0.19)</b>           | LOW                   |
| PCAP:PBWrTM       | LOW <sup>1</sup>        | -                       | <b>0.02 (0.00, 0.14)</b>           | LOW                   |
| PCAP:INCUPBWr     | LOW <sup>1</sup>        | -                       | <b>0.02 (0.00, 0.07)</b>           | LOW                   |
| PBWrCAP:TM        | VERY LOW <sup>1,3</sup> | -                       | 1.47 (0.06, 7.84)                  | VERY LOW              |
| PBWrCAP:RCARE     | VERY LOW <sup>1,3</sup> | VERY LOW <sup>1,2</sup> | 0.46 (0.08, 1.34)                  | VERY LOW              |
| PBWrCAP:PBWr      | VERY LOW <sup>1,2</sup> | VERY LOW <sup>1,3</sup> | 0.38 (0.07, 1.19)                  | VERY LOW              |
| PBWrCAP:PBWrHHGAS | VERY LOW <sup>1,3</sup> | -                       | 0.45 (0.03, 2.04)                  | VERY LOW              |
| PBWrCAP:PBWrTM    | VERY LOW <sup>1,3</sup> | -                       | 0.28 (0.03, 1.13)                  | VERY LOW              |
| PBWrCAP:INCUPBWr  | VERY LOW <sup>1,3</sup> | -                       | 0.26 (0.00, 1.55)                  | VERY LOW              |
| TM:RCARE          | LOW <sup>1</sup>        | LOW <sup>1</sup>        | 0.95 (0.06, 3.94)                  | LOW                   |
| TM: PBWr          | LOW <sup>1</sup>        | LOW <sup>1</sup>        | 0.79 (0.05, 3.30)                  | LOW                   |
| TM:PBWrHHGAS      | LOW <sup>1</sup>        | -                       | 0.96 (0.03, 4.91)                  | LOW                   |
| TM:PBWrTM         | LOW <sup>1</sup>        | -                       | 0.58 (0.02, 2.88)                  | LOW                   |
| TM:INCUPBWr       | LOW <sup>1</sup>        | -                       | 0.54 (0.00, 3.38)                  | LOW                   |

|                    |                       |                          |                   |          |
|--------------------|-----------------------|--------------------------|-------------------|----------|
| RCARE: PBWr        | LOW <sup>1</sup>      | MODERATE <sup>4</sup>    | 0.90 (0.41, 1.87) | MODERATE |
| RCARE:PBWrHHGAS    | LOW <sup>1</sup>      | -                        | 1.07 (0.12, 4.56) | LOW      |
| RCARE:PBWrTM       | MODERATE <sup>4</sup> | -                        | 0.66 (0.13, 2.28) | MODERATE |
| RCARE:INCUPBWr     | LOW <sup>1</sup>      | -                        | 0.62 (0.01, 3.56) | LOW      |
| PBWr:PBWrHHGAS     | -                     | LOW <sup>1</sup>         | 1.14 (0.15, 4.17) | LOW      |
| PBWr:PBWrTM        | -                     | MODERATE <sup>#, 4</sup> | 0.72 (0.18, 2.03) | MODERATE |
| PBWr:INCUPBWr      | -                     | LOW <sup>1</sup>         | 0.66 (0.01, 3.62) | LOW      |
| PBWrHHGAS:PBWrTM   | LOW <sup>1</sup>      | -                        | 1.35 (0.10, 5.93) | LOW      |
| PBWrHHGAS:INCUPBWr | LOW <sup>1</sup>      | -                        | 1.26 (0.01, 7.29) | LOW      |
| PBWrTM: INCUPBWr   | LOW <sup>1</sup>      | -                        | 1.36 (0.01, 7.78) | LOW      |

<sup>1</sup>Downgraded by two levels for very serious imprecision due to small sample size, event rates and risk-benefit could not be decided.

<sup>2</sup>Downgraded by one level for serious risk of bias due to possible selection bias in two studies (Santos 2012; Talakoub 2015).

<sup>3</sup>Downgraded by one level for serious risk of bias due to possible selection bias in two studies (Hashim 2017; Talakoub 2015).

<sup>4</sup>Downgraded by one level for serious imprecision due to OIS criterion not met.

<sup>#</sup>Not downgraded for serious risk of bias, since the study with high risk of selection bias (Chawla 2011) as only 5.3% weightage.

Note: The outcome is not downgraded for lack of blinding in any comparison, since it is an objective outcome and blinding is difficult for these interventions.

### Secondary outcome - Mortality before discharge

| Comparison         | Indirect Evidence     | Direct Evidence       | Network Meta-analysis              |                       |
|--------------------|-----------------------|-----------------------|------------------------------------|-----------------------|
|                    | Certainty of evidence | Certainty of evidence | Risk Ratio (95% Credible Interval) | Certainty of evidence |
| PBWrPCAP:PBWrTM    | LOW <sup>1</sup>      | -                     | 0.55 (0.04, 2.21)                  | LOW                   |
| PBWrPCAP:TM        | LOW <sup>1</sup>      | -                     | 0.43 (0.02, 1.92)                  | LOW                   |
| PBWrPCAP:PBWrHHGAS | LOW <sup>1</sup>      | -                     | 0.29 (0.02, 1.10)                  | LOW                   |
| PBWrPCAP:PBWr      | -                     | LOW <sup>1</sup>      | <b>0.26 (0.02, 0.86)</b>           | LOW                   |
| PBWrPCAP:PCAP      | LOW <sup>1</sup>      | -                     | 0.27 (0.01, 1.34)                  | LOW                   |
| PBWrPCAP:RCARE     | LOW <sup>1</sup>      | -                     | <b>0.19 (0.02, 0.66)</b>           | LOW                   |
| PBWrTM:TM          | LOW <sup>1</sup>      | -                     | 0.98 (0.16, 3.32)                  | LOW                   |
| PBWrTM:PBWrHHGAS   | LOW <sup>1</sup>      | -                     | 0.67 (0.16, 1.80)                  | LOW                   |
| PBWrTM:PBWr        | -                     | LOW <sup>1, #</sup>   | 0.60 (0.20, 1.28)                  | LOW                   |

|                 |                        |                        |                   |     |
|-----------------|------------------------|------------------------|-------------------|-----|
| PBWrTM:PCAP     | LOW <sup>2</sup>       | -                      | 0.64 (0.06, 2.62) | LOW |
| PBWrTM:RCARE    | LOW <sup>1, #</sup>    | -                      | 0.45 (0.12, 1.02) | LOW |
| TM:PBWrHHGAS    | LOW <sup>1</sup>       | -                      | 0.99 (0.17, 3.09) | LOW |
| TM:PBWr         | LOW <sup>1</sup>       | LOW <sup>1</sup>       | 0.87 (0.21, 2.29) | LOW |
| TM:PCAP         | LOW <sup>1</sup>       | -                      | 0.92 (0.07, 4.04) | LOW |
| TM:RCARE        | LOW <sup>1</sup>       | LOW <sup>1</sup>       | 0.65 (0.14, 1.75) | LOW |
| PBWrHHGAS:PBWr  | -                      | LOW <sup>1</sup>       | 1.03 (0.44, 2.08) | LOW |
| PBWrHHGAS:PCAP  | LOW <sup>1</sup>       | -                      | 1.10 (0.12, 4.37) | LOW |
| PBWrHHGAS:RCARE | LOW <sup>1</sup>       | -                      | 0.78 (0.28, 1.59) | LOW |
| PBWr:PCAP       | LOW <sup>2, 3, *</sup> | LOW <sup>2</sup>       | 1.07 (0.16, 3.92) | LOW |
| PBWr:RCARE      | LOW <sup>1</sup>       | LOW <sup>2, 3, *</sup> | 0.76 (0.47, 1.02) | LOW |
| PCAP:RCARE      | LOW <sup>2, 3, *</sup> | LOW <sup>2</sup>       | 1.36 (0.19, 4.63) | LOW |

<sup>1</sup>Downgraded by two levels for very serious imprecision due to small sample size and confidence interval crossing 'no difference', showing appreciable risk as well as benefit.

<sup>2</sup>Downgraded by one level for serious imprecision, since OIS criteria is not met.

<sup>3</sup>Downgraded by one level for publication bias.

<sup>#</sup>Not downgraded for serious risk of bias, since the study with possible selection bias (Chawla 2011) has only 6.3% weightage.

<sup>\*</sup>Not downgraded for risk of bias, Since the studies with possible risk of bias (Ahmed 2013; Chantaroj 2011, Farhadi 2012) contribute only 7.4% weightage.

Note: The outcome is not downgraded for lack of blinding in any comparison, since it is an objective outcome and blinding is difficult for these interventions.

**Secondary outcome - Major brain injury [defined as grade 3-4 intraventricular hemorrhage or periventricular leukomalacia]**

| Comparison         | Indirect Evidence           | Direct Evidence       | Network Meta-analysis              |                       |
|--------------------|-----------------------------|-----------------------|------------------------------------|-----------------------|
|                    | Certainty of evidence       | Certainty of evidence | Risk Ratio (95% Credible Interval) | Certainty of evidence |
| PBWrHHGAS:PBWrPCAP | LOW <sup>2</sup>            | -                     | 6.90 (0.03, 33.23)                 | LOW                   |
| PBWrHHGAS:TM       | LOW <sup>2</sup>            | -                     | 0.82 (0.06, 3.50)                  | LOW                   |
| PBWrHHGAS:PBWrTM   | VERY LOW <sup>2, 3, 4</sup> | -                     | 0.61 (0.04, 2.56)                  | VERY LOW              |
| PBWrHHGAS:PBWr     | -                           | MODERATE <sup>1</sup> | 0.38 (0.08, 1.08)                  | MODERATE              |
| PBWrHHGAS:PCAP     | LOW <sup>2</sup>            | -                     | 0.41 (0.02, 1.97)                  | LOW                   |
| PBWrHHGAS:RCARE    | LOW <sup>2</sup>            | -                     | <b>0.23 (0.03, 0.67)</b>           | MODERATE <sup>s</sup> |
| PBWrPCAP:TM        | LOW <sup>2</sup>            | -                     | 3.15 (0.01, 17.85)                 | LOW                   |
| PBWrPCAP:PBWrTM    | VERY LOW <sup>2, 3, 4</sup> | -                     | 2.25 (0.01, 12.63)                 | VERY LOW              |

|                |                             |                             |                   |          |
|----------------|-----------------------------|-----------------------------|-------------------|----------|
| PBWrPCAP:PBWr  | -                           | LOW <sup>2</sup>            | 1.35 (0.01, 7.75) | LOW      |
| PBWrPCAP:PCAP  | LOW <sup>2</sup>            | -                           | 1.52 (0.00, 8.78) | LOW      |
| PBWrPCAP:RCARE | LOW <sup>2</sup>            | -                           | 0.79 (0.01, 4.52) | LOW      |
| TM:PBWrTM      | VERY LOW <sup>2, 3, 4</sup> | -                           | 1.38 (0.08, 6.09) | VERY LOW |
| TM:PBWr        | -                           | LOW <sup>2</sup>            | 0.86 (0.13, 2.73) | LOW      |
| TM:PCAP        | LOW <sup>2</sup>            | -                           | 0.92 (0.03, 4.59) | LOW      |
| TM:RCARE       | LOW <sup>2</sup>            | -                           | 0.52 (0.06, 1.69) | LOW      |
| PBWrTM:PBWr    | -                           | VERY LOW <sup>2, 3, 4</sup> | 1.22 (0.18, 4.12) | VERY LOW |
| PBWrTM:PCAP    | VERY LOW <sup>2, 3, 4</sup> | -                           | 1.32 (0.04, 6.61) | VERY LOW |
| PBWrTM:RCARE   | VERY LOW <sup>2, 3, 4</sup> | -                           | 0.73 (0.08, 2.57) | VERY LOW |
| PBWr:PCAP      | LOW <sup>2</sup>            | LOW <sup>2</sup>            | 1.05 (0.09, 4.57) | LOW      |
| PBWr:RCARE     | LOW <sup>2</sup>            | LOW <sup>2</sup>            | 0.60 (0.24, 1.04) | LOW      |
| PCAP:RCARE     | LOW <sup>2</sup>            | LOW <sup>2</sup>            | 1.49 (0.12, 5.89) | LOW      |

<sup>1</sup>Downgraded by one level for serious imprecision due to OIS criterion not met.

<sup>2</sup>Downgraded by two levels for very serious imprecision due to small sample size and confidence interval crossing 'no difference', showing appreciable risk as well as benefit.

<sup>3</sup>Downgraded by one level for serious risk of bias due to possible selection bias in one study (Chawla 2011).

<sup>4</sup>Downgraded by one level for serious inconsistency due to heterogeneity.

<sup>5</sup>Upgraded by one level as the upper limit of confidence interval for the network estimate shows an absolute risk reduction of more than 25%.

^ Values in bold are statistically significant

GRADE Ranking the Quality of Evidence

*High quality* - Very confident that the true effect lies close to that of the estimate of the effect

*Moderate quality* - Moderately confident in the effect estimate: the true effect is likely to be close to the estimate of the effect, but there is a possibility that it is substantially different

*Low quality* - Confidence in the effect estimate is limited: the true effect may be substantially different from the estimate of the effect

*Very low quality* - Very little confidence in the effect estimate: the true effect is likely to be substantially different from the estimate of effect

**eTable 5.** Summary of relevant results of the network meta-analysis\*

|                   | Mean temperature                       | Mean temperature (Bag / Wrap split)      | Mean temperature (<=30 weeks)          | Moderate to severe hypothermia      | Hypothermia (any)                   | Hyperthermia                                         | Mortality                           | MBI                                                 |
|-------------------|----------------------------------------|------------------------------------------|----------------------------------------|-------------------------------------|-------------------------------------|------------------------------------------------------|-------------------------------------|-----------------------------------------------------|
| <b>PBAGWr</b>     | +                                      | +                                        | +                                      | +                                   | +                                   | -<br>(Direct evidence)                               | =<br>(Trend towards decreased risk) | =<br>(Trend towards decreased risk)                 |
| <b>PBAGWrPCAP</b> | +                                      | +                                        | +                                      | =<br>(Trend towards decreased risk) | +                                   | =                                                    | +<br>(Compared to RCARE and PBWr)   | =                                                   |
| <b>PBAGWrTM</b>   | +<br>(Compared to both RCARE and PBWr) | +<br>(Compared to RCARE, PWRAP and PBAG) | +<br>(Compared to both RCARE and PBWr) | =                                   | +                                   | -<br>(Direct evidence when compared to PBWr only)    | =<br>(Trend towards decreased risk) | =                                                   |
| <b>PCAP</b>       | +                                      | +                                        | +                                      | ?                                   | =<br>(Trend towards decreased risk) | +<br>(compared to all interventions including RCARE) | =                                   | =                                                   |
| <b>TM</b>         | +                                      | +                                        | +                                      | +                                   | +                                   | =                                                    | =                                   | =                                                   |
| <b>PBWrHHGAS</b>  | +                                      | +                                        | +                                      | +                                   | +                                   | =                                                    | =                                   | +<br>(Compared to RCARE and trend compared to PBWr) |
| <b>INCUPBWr</b>   | =                                      | =                                        | +                                      | =                                   | =                                   | =                                                    | =                                   | =                                                   |
| <b>SSC</b>        | ?                                      | ?                                        | ?                                      | =                                   | +                                   | ?                                                    | ?                                   | ?                                                   |

\* Interventions are compared to 'routine care' by default. If an intervention had resulted in better or worse outcomes when compared to another intervention, they are mentioned in brackets.

+Better outcome compared to routine care

=Similar efficacy compared to routine care. If a trend towards better or worse outcome is present, it is mentioned as 'Trend'

-Worse outcome when compared to routine care

? Not evaluated by any of the included studies



## eReferences

1. Ahmed BT, Hussein M, Monir H. Effect of Plastic Bag (Vinyl Bags) on Prevention of Hypothermia in Preterm Infants. *Med. J. Cairo Univ.* 2013;81(1):169-73.
2. Almeida PG. Transwarmer mattress project (TeMP) at delivery. A prospective randomized control trial of the transwarmer mattress to reduce admission hypothermia of low birth weight infants [dissertation]. Manoa: University of Hawaii, 2013.
3. Bergman NJ, Linley LL, Fawcus SR. Randomized controlled trial of skin-to-skin contact from birth versus conventional incubator for physiological stabilization in 1200- to 2199-gram newborns. *Acta Paediatrica* 2004;93(6):779–85.
4. Bhavsar SR, Kabra NS, Avasthi BS, Sharma RS, Dash SW, Tali SH, et al. Efficacy and safety of polyethylene wrap in preventing hypothermia in preterm and low birth weight neonates during transport: a randomised controlled trial. *Perinatology* 2015;16(1):23–30.
5. Brennan AB. Effect of sodium acetate transport mattresses on admission temperatures of infants <= 1500 grams [dissertation]. Gainesville (FL): University of Florida, 1996.
6. Çağlar S, Gözen D, Ince Z. Heat loss prevention (help) after birth in preterm infants using vinyl isolation bag or polyethylene wrap. *J Obstet Gynecol Neonatal Nurs.* 2014;43(2):216-23.
7. Cardona Torres LM, Amador Licona N, Garcia Campos ML, Guizar-Mendoza JM. Polyethylene wrap for thermoregulation in the preterm infant: a randomised trial. *Indian Pediatrics* 2012;49(2):129–32.
8. Chantaroj S, Techasatid W. Effect of polyethylene bag to prevent heat loss in preterm infants at birth: a randomized controlled trial. *J Med Assoc Thai.* 2011;94 Suppl 7:S32-7.
9. Chawla S, Amaram A, Gopal SP, Natarajan G. Safety and efficacy of Trans-warmer mattress for preterm neonates: results of a randomized controlled trial. *J Perinatol.* 2011;31(12):780-4.
10. Doglioni N, Cavallin F, Mardegan V, Palatron S, Filippone M, Vecchiato L, Bellettato M, Chiandetti L, Trevisanuto D. Total body polyethylene wraps for preventing hypothermia in preterm infants: a randomized trial. *J Pediatr.* 2014;165(2):261-266.
11. Farhadi R, Naderi M, Rahmani Z, Ghafari V, Khalilian A. Effect of “ZIPKIF” plastic bag on prevention of hypothermia in preterm infants: a randomised controlled trial. *Journal of Mazandaran University of Medical Sciences* 2012;22(93):19–26.
12. Gathwala G, Singh G, Kunal, Agrawal N. Safety and efficacy of vinyl bags in prevention of hypothermia of preterm neonates at birth. *Indian J of Public Health* 2010;54(1):24–6.
13. Shafie H, Syed Zakaria SZ, Adli A, Shareena I, Rohana J. Polyethylene versus cotton cap as an adjunct to body wrap in preterm infants. *Pediatr Int.* 2017;59(7):776-780.
14. Hu XJ, Wang L, Zheng RY, Lv TC, Zhang YX, Cao Y, Huang GY. Using polyethylene plastic bag to prevent moderate hypothermia during transport in very low birth weight infants: a randomized trial. *J Perinatol.* 2018;38(4):332-336.
15. Knobel RB, Wimmer JE Jr, Holbert D. Heat loss prevention for preterm infants in the delivery room. *J Perinatol.* 2005;25(5):304-8.
16. Leadford AE, Warren JB, Manasyan A, Chomba E, Salas AA, Schelonka R, Carlo WA. Plastic bags for prevention of hypothermia in preterm and low birth weight infants. *Pediatrics.* 2013;132(1):e128-34.
17. Leslie A, Wardle SP, Budge H, Marlow N, Brocklehurst P. [Randomised controlled trial of gel warming mattresses to prevent hypothermia during resuscitation at birth of premature infants]. Neonatal Society 2007 Autumn Meeting. London: Neonatal Society, 2007.

18. Mathew B, Lakshminrusimha S, Sengupta S, Carrion V. Randomized controlled trial of vinyl bags versus thermal mattress to prevent hypothermia in extremely low-gestational-age infants. *Am J Perinatol*. 2013;30(4):317-22.
19. McCarthy LK, Molloy EJ, Twomey AR, Murphy JF, O'Donnell CP. A randomised trial of exothermic mattresses for preterm newborns in polyethylene bags. *Pediatrics* 2013;132(1):e135-41.
20. McGrory L, Owen LS, Thio M, Dawson JA, Rafferty AR, Malhotra A, Davis PG, Kamlin COF. A Randomized Trial of Conditioned or Unconditioned Gases for Stabilizing Preterm Infants at Birth. *J Pediatr*. 2018;193:47-53.
21. Meyer MP, Bold GT. Admission temperatures following radiant warmer or incubator transport for preterm infants <28 weeks: a randomised study. *Arch Dis Child Fetal Neonatal Ed*. 2007;92(4):F295-7.
22. Meyer MP, Hou D, Ishrar NN, Dito I, te Pas AB. Initial respiratory support with cold, dry gas versus heated humidified gas and admission temperature of preterm infants. *J Pediatr*. 2015;166(2):245-50.
23. Nimbalkar SM, Khanna AK, Patel DV, Nimbalkar AS, Phatak AG. Efficacy of Polyethylene Skin Wrapping in Preventing Hypothermia in Preterm Neonates (<34 Weeks): A Parallel Group Non-blinded Randomized Control Trial. *J Trop Pediatr*. 2019;65(2):122-9.
24. Reilly MC, Vohra S, Rac VE, Dunn M, Ferrelli K, Kiss A, Vincer M, Wimmer J, Zayack D, Soll RF; Vermont Oxford Network Heat Loss Prevention (HeLP) Trial Study Group. Randomized trial of occlusive wrap for heat loss prevention in preterm infants. *J Pediatr*. 2015;166(2):262-8.e2.
25. Reilly MC, Vohra S, Rac VE, Zayack D, Wimmer J, Vincer M, Ferrelli K, Kiss A, Soll RF, Dunn M. Parallel Exploratory RCT of Polyethylene Wrap for Heat Loss Prevention in Infants Born at Less than 24 Weeks' Gestation. *Neonatology*. 2019;116(1):37-41.
26. Rohana J, Khairina W, Boo NY, Shareena I. Reducing hypothermia in preterm infants with polyethylene wrap. *Pediatr Int*. 2011;53(4):468-74.
27. Tecson-delos Santos CM, Uy ME, Uy H, Sto Nino OV. [Polyethylene plastic wrap and cap for thermoregulation of preterm infants 28 to 36 weeks old admitted to the neonatal intensive care unit: a randomised controlled trial]. *J Paediatr Child Health*. 2012; Vol. 48 (Suppl 1):154.
28. Shabeer MP, Abiramalatha T, Devakirubai D, Rebekah G, Thomas N. Standard care with plastic bag or portable thermal nest to prevent hypothermia at birth: a three-armed randomized controlled trial. *J Perinatol*. 2018;38(10):1324-1330.
29. Simon P, Dannaway D, Bright B, Krous L, Wlodaver A, Burks B, Thi C, Milam J, Escobedo M. Thermal defense of extremely low gestational age newborns during resuscitation: exothermic mattresses vs polyethylene wrap. *J Perinatol*. 2011;31(1):33-7.
30. Smith J, Usher K, Alcock G, Buettner P. Application of plastic wrap to improve temperatures in infants born less than 30 weeks gestation: a randomized controlled trial. *Neonatal Netw*. 2013;32(4):235-45.
31. Talakoub S, Shahbazifard Z, Armanian AM, Ghazavi Z. Effect of two polyethylene covers in prevention of hypothermia among premature neonates. *Iran J Nurs Midwifery Res*. 2015;20(3):322-6.
32. Trevisanuto D, Doglioni N, Cavallin F, Parotto M, Micaglio M, Zanardo V. Heat loss prevention in very preterm infants in delivery rooms: a prospective, randomized, controlled trial of polyethylene caps. *J Pediatr*. 2010;156(6):914-917.e1.

33. Vohra S, Frent G, Campbell V, Abbott M, Whyte R. Effect of polyethylene occlusive skin wrapping on heat loss in very low birth weight infants at delivery: a randomized trial. *J Pediatr*. 1999;134(5):547-51.
34. Vohra S, Roberts RS, Zhang B, Janes M, Schmidt B. Heat Loss Prevention (HeLP) in the delivery room: A randomized controlled trial of polyethylene occlusive skin wrapping in very preterm infants. *J Pediatr*. 2004;145(6):750-3.
35. Agrawal N, Das K, Patwal P, Pandita N, Gupta A. Wrapping newborn infants in cloth and newspaper after delivery led to higher temperatures on arrival at the neonatal intensive care unit. *Acta Paediatr*. 2018;107(8):1335-8.
36. Baum JD, Scopes JW. The silver swaddler. Device for preventing hypothermia in the newborn. *Lancet*. 1968;1(7544):672-3.
37. Castro MM, Repeto M, Cancela MJ, Latof M, Hernandez C, Bustos R. Clinical experience in the use of polyethylene bags to reduce hypothermia in newborns less than 1000g [Experiencia clinica en la utilizacion de bolsa de polietileno para disminuir la hipotermia en el recién nacido menor de 1000 gramos]. *Archivos de Pediatría del Uruguay* 2007;78(2):110-4.
38. Duman N, Utkutan S, Kumral A, Koroglu TF, Ozkan H. Polyethylene skin wrapping accelerates recovery from hypothermia in very low-birthweight infants. *Pediatr Int*. 2006; 48: 29-32.
39. Meyer MP, Payton MJ, Salmon A, Hutchinson C, de Klerk A. A clinical comparison of radiant warmer and incubator care for preterm infants from birth to 1800 grams. *Pediatrics*. 2001;108(2):395-401.
40. Nuntnarumit P, Deesomchok A. Efficacy of polyethylene occlusive skin wrapping with plastic bag in preventing hypothermia in infants less than 32 weeks' gestational age at delivery. Proceedings of the Pediatric Academic Societies' Annual Meeting; 2004 May 1-4; San Francisco, (CA). The Woodlands (TX): Pediatric Academic Societies, 2004.
41. Punnahitananda S, Thaithumyanon P. Efficacy of polyethylene plastic wrap for the prevention of hypothermia during immediate postnatal period in preterm infants: a randomised controlled trial. Proceedings of the Pediatric Academic Societies' Meeting; 2008 May 2-6, 2008; Honolulu (Hawaii). The Woodlands (TX): Pediatric Academic Societies, 2008:E- PAS2008:634458.10.
42. Roberts JR. Use of a stockinette cap on premature infants after delivery [dissertation]. Denton (TX): Texas Women's University, 1981.
43. Linnér A, Klemming S, Sundberg B, Lilliesköld S, Westrup B, Jonas W, Skiöld B. Immediate skin-to-skin contact is feasible for very preterm infants but thermal control remains a challenge. *Acta Paediatr*. 2020 Apr;109(4):697-704.
44. Jia YS, Lin ZL, Lv H, Li YM, Green R, Lin J. Effect of delivery room temperature on the admission temperature of premature infants: a randomized controlled trial. *J Perinatol*. 2013;33(4):264-7.
